# Supplementary material for: Associations between multimorbidity and adverse clinical outcomes in patients with chronic kidney disease: a systematic review and meta-analysis
Source: PubMed Central journal article supplement — BMJ Open. 2020 Jun 30;10(6):e038401. doi: 10.1136/bmjopen-2020-038401 (PMC7328898; doi:10.1136/bmjopen-2020-038401), 2020-06-30
Supplement: bmjopen-2020-038401.draft_revisions.pdf [file bmjopen-2020-038401.draft_revisions.pdf]

# BMJ Open

BMJ Open is committed to open peer review. As part of this commitment we make the peer review history of every article we publish publicly available.

When an article is published we post the peer reviewers' comments and the authors' responses online. We also post the versions of the paper that were used during peer review. These are the versions that the peer review comments apply to.

The versions of the paper that follow are the versions that were submitted during the peer review process. They are not the versions of record or the final published versions. They should not be cited or distributed as the published version of this manuscript.

BMJ Open is an open access journal and the full, final, typeset and author-corrected version of record of the manuscript is available on our site with no access controls, subscription charges or pay-per-view fees (<http://bmjopen.bmj.com>).

If you have any questions on BMJ Open's open peer review process please email [info.bmjopen@bmj.com](mailto:info.bmjopen@bmj.com)

# BMJ Open

## Associations between multimorbidity and adverse clinical outcomes in patients with chronic kidney disease: a systematic review and meta-analysis

|                               |                                                                                                                                                                                                                                                                                                                                                                                                                                                                                                              |
|-------------------------------|--------------------------------------------------------------------------------------------------------------------------------------------------------------------------------------------------------------------------------------------------------------------------------------------------------------------------------------------------------------------------------------------------------------------------------------------------------------------------------------------------------------|
| Journal:                      | <i>BMJ Open</i>                                                                                                                                                                                                                                                                                                                                                                                                                                                                                              |
| Manuscript ID                 | bmjopen-2020-038401                                                                                                                                                                                                                                                                                                                                                                                                                                                                                          |
| Article Type:                 | Original research                                                                                                                                                                                                                                                                                                                                                                                                                                                                                            |
| Date Submitted by the Author: | 12-Mar-2020                                                                                                                                                                                                                                                                                                                                                                                                                                                                                                  |
| Complete List of Authors:     | Sullivan, Michael; University of Glasgow, Institute of Cardiovascular and Medical Sciences<br>Rankin, Alastair; University of Glasgow, Institute of Cardiovascular and Medical Sciences<br>Jani, Bhautesh; University of Glasgow, General Practice and Primary Care, Institute of Health and Wellbeing<br>Mair, Frances; University of Glasgow, General Practice and Primary Care, Institute of Health and Wellbeing<br>Mark, Patrick; University of Glasgow, Institute of Cardiovascular & Medical Sciences |
| Keywords:                     | Chronic renal failure < NEPHROLOGY, Dialysis < NEPHROLOGY, Diabetic nephropathy & vascular disease < DIABETES & ENDOCRINOLOGY, Ischaemic heart disease < CARDIOLOGY, End stage renal failure < NEPHROLOGY                                                                                                                                                                                                                                                                                                    |
|                               |                                                                                                                                                                                                                                                                                                                                                                                                                                                                                                              |

SCHOLARONE™  
Manuscripts

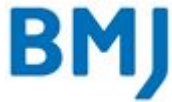

I, the Submitting Author has the right to grant and does grant on behalf of all authors of the Work (as defined in the below author licence), an exclusive licence and/or a non-exclusive licence for contributions from authors who are: i) UK Crown employees; ii) where BMJ has agreed a CC-BY licence shall apply, and/or iii) in accordance with the terms applicable for US Federal Government officers or employees acting as part of their official duties; on a worldwide, perpetual, irrevocable, royalty-free basis to BMJ Publishing Group Ltd ("BMJ") its licensees and where the relevant Journal is co-owned by BMJ to the co-owners of the Journal, to publish the Work in this journal and any other BMJ products and to exploit all rights, as set out in our [licence](#).

The Submitting Author accepts and understands that any supply made under these terms is made by BMJ to the Submitting Author unless you are acting as an employee on behalf of your employer or a postgraduate student of an affiliated institution which is paying any applicable article publishing charge ("APC") for Open Access articles. Where the Submitting Author wishes to make the Work available on an Open Access basis (and intends to pay the relevant APC), the terms of reuse of such Open Access shall be governed by a Creative Commons licence – details of these licences and which [Creative Commons](#) licence will apply to this Work are set out in our licence referred to above.

Other than as permitted in any relevant BMJ Author's Self Archiving Policies, I confirm this Work has not been accepted for publication elsewhere, is not being considered for publication elsewhere and does not duplicate material already published. I confirm all authors consent to publication of this Work and authorise the granting of this licence.

1  
2 **Associations between multimorbidity and adverse clinical outcomes in patients**  
3  
4 **with chronic kidney disease: a systematic review and meta-analysis**  
5  
6

7 Michael Sullivan<sup>1</sup>, Alastair Rankin<sup>1</sup>, Bhautesh Dinesh Jani<sup>2</sup>, Frances S Mair<sup>2</sup>, Patrick B  
8  
9 Mark<sup>1</sup>  
10  
11  
12

13  
14 1 – Institute of Cardiovascular and Medical Sciences, University of Glasgow, Glasgow, UK  
15

16 2 – General Practice and Primary Care, Institute of Health and Wellbeing, University of  
17  
18 Glasgow, Glasgow, UK  
19  
20  
21  
22

23 **Corresponding author:**  
24

25 Michael Sullivan  
26

27 Address: Institute of Cardiovascular and Medical Sciences, University of Glasgow, 126  
28

29 University Place, Glasgow, G12 8TA, UK  
30  
31

32 Telephone: +44(0) 141 330 2677  
33

34 Email: [Michael.sullivan@glasgow.ac.uk](mailto:Michael.sullivan@glasgow.ac.uk)  
35  
36

37 Twitter Handle: @sullivanmk8  
38  
39  
40

41 **Keywords:** chronic kidney disease, dialysis, comorbid, multimorbidity, diabetes,  
42  
43 cardiovascular  
44  
45  
46  
47  
48  
49  
50  
51  
52  
53  
54  
55  
56  
57  
58  
59  
60

## Abstract

*Objective:* To systematically review the literature exploring the associations between multimorbidity (the presence of two or more LTCs) and adverse clinical outcomes in patients with CKD.

*Data sources:* MEDLINE, EMBASE, CINAHL, Cochrane Library and SCOPUS (1946-2019). The main search terms were “Chronic Kidney Failure” and “Multimorbid\*”.

*Participants:* adults over the age of 18 with CKD stages three to five i.e. eGFR less than 60ml/minute/1.73m<sup>2</sup>.

*Exposure:* Multimorbidity quantified by Measures.

*Outcome measures:* all-cause mortality, renal progression, hospitalisation and cardiovascular events.

*Study analysis:* Newcastle Ottawa Scale for quality appraisal and fixed-effects meta-analysis.

*Results:* Of 1852 papers identified, 26 met the inclusion criteria. 21 papers involved patients with advanced CKD and no studies were from low or middle income countries. All-cause mortality was an outcome in all studies. Patients with multimorbidity were at higher risk of mortality compared to patients without multimorbidity (Total risk ratio 2.28 (95% confidence interval 1.81-2.88)). The risk of mortality was higher with increasing multimorbidity (Total hazard ratio 1.31 (1.27-1.36)) and both concordant and discordant LTCs were associated with heightened risk. Multimorbidity was associated with renal progression in four studies, hospitalisation in five studies and cardiovascular events in two studies.

*Limitations:* Outcomes did not include all of those prioritised by patients e.g. quality of life. Meta-analysis could only include 10 of 26 papers as the methodologies of studies were heterogeneous.

*Conclusions:* There are associations between multimorbidity and adverse clinical outcomes in patients with CKD. However, most data relate to mortality risk in patients with advanced

1  
2 CKD. There is limited evidence regarding patients with mild to moderate CKD, outcomes  
3  
4 such as cardiovascular events, types or patterns of LTCs and regarding patients from low  
5  
6 or middle income countries.  
7

8  
9 *Prospero Registration:* CRD42019147424.  
10

## 11 12 13 **Article Summary**

### 14 15 **Strengths and limitations of this study**

- 16  
17 • This review is the first to synthesise the existing evidence on multimorbidity in patients  
18  
19 with CKD and it included a range of settings.  
20  
21
- 22  
23 • The outcomes of interest were chosen by researchers and these do not include all  
24  
25 outcomes that are important to patients e.g. quality of life.  
26  
27
- 28  
29 • Two authors independently performed paper selection, data extraction and quality  
30  
31 appraisal.  
32
- 33  
34 • Meta-analysis was performed, but only included selected papers because of  
35  
36 methodological heterogeneity of papers.  
37  
38  
39  
40  
41  
42  
43  
44  
45  
46  
47  
48  
49  
50  
51  
52  
53  
54  
55  
56  
57  
58  
59  
60

## Introduction

Multimorbidity is the presence of two or more long-term conditions (LTCs)<sup>1</sup>. In a Scottish study of 1.8 million patients, it was found to affect 23% of the whole population and in particular those from areas of lower socioeconomic status<sup>2</sup>. It is a problem for individual patients because it is associated with complex treatment regimens that result in a high burden of treatment and reduced quality of life<sup>3</sup>. For clinicians and health services, caring for these individuals represents a huge workload and equates to approximately two thirds of health care spending<sup>4</sup>. The current disease-orientated approaches of guidelines and healthcare are inadequate for patients with multiple LTCs and complex needs<sup>5</sup>.

Multimorbidity is more common in patients with chronic kidney disease (CKD) than any other LTC: e.g. among 2.5 million Canadians, patients with CKD had more co-morbid LTCs than patients with lung disease (mean 4.2 LTCs versus 2.8)<sup>6</sup>. The prevalence of CKD is around 12%<sup>7</sup> and as this rises globally, the adverse effects of CKD and multimorbidity on quality of life are increasing<sup>8</sup>. The leading cause of death in patients with CKD is cardiovascular disease and although this is partly related to risk factors common to both conditions, low estimated glomerular filtration rate (eGFR) and proteinuria are predictors of cardiovascular mortality<sup>9, 10</sup>. The higher cardiovascular risk observed among CKD patients is independent of traditional atherosclerotic risk factors such as hypertension and dyslipidaemia, but the reasons for this and the influence of multimorbidity on CKD are incompletely understood. CKD and multimorbidity therefore occur together frequently and there are a number of issues common to both problems such as polypharmacy and significant treatment burden<sup>11</sup>. We undertook this systematic review to establish the current evidence concerning associations between multimorbidity and adverse clinical outcomes in patients with CKD.

## Materials and Methods

The Preferred Reporting Items for Systematic Reviews and Meta-Analyses Protocols (PRISMA-P) guidelines were followed<sup>12</sup> and this review was registered with the International Prospective Register of Systematic Reviews (CRD42019147424).

### *Literature Search*

A comprehensive search strategy identified studies of patients with CKD that investigated the associations between multimorbidity and adverse clinical outcomes (see Supplementary File 1 for search terms). We included observational studies; in particular those using electronic health care records. There was no restriction on sample size. The databases searched included studies from 1946 to 2019. The search was limited to papers published in English. Databases searched were MEDLINE (OVID interface), EMBASE (OVID interface), CINAHL Complete (EBSCO interface), The Cochrane Library (OVID interface), and SCOPUS. Selected medical subject headings were combined with keywords relating to multimorbidity and CKD to create a search strategy which was produced for use in MEDLINE and amended for use in the other databases, using controlled vocabulary, Boolean operators and search symbols. The search was carried out to include literature published up to 29<sup>th</sup> August 2019. The results were supplemented with searches of reference lists of included studies. Search data were stored and merged using Endnote X9 (Clarivate Analytics, Philadelphia, USA) and papers were shared and assessed using DistillerSR (Evidence Partners, Ottawa, Canada).

### *Study Selection*

We included empirical quantitative studies that contained data on associations between Multimorbidity Measures and all-cause mortality or additional outcomes in adults with CKD. We accepted any Multimorbidity Measure, which included simple counts of LTCs and co-morbidity scoring systems. Additional outcomes were hospitalisation, cardiovascular events, cardiovascular deaths, heart failure hospitalisations and renal progression (40% reduction



1  
2 in eGFR, doubling of serum creatinine or initiation of renal replacement therapy (RRT)).  
3  
4 Review articles, drug intervention studies, qualitative studies, case reports and conference  
5  
6 abstracts were excluded. Studies that analysed the relationship between a Multimorbidity  
7  
8 Measure and any of our outcomes of interest were included in adults over the age of 18 with  
9  
10 CKD stages three to five i.e. eGFR less than 60ml/minute/1.73m<sup>2</sup> including those requiring  
11  
12 RRT i.e. haemodialysis (HD), peritoneal dialysis (PD) or renal transplantation. Exclusion  
13  
14 criteria were children or adolescents aged 18 or under, animal studies and individuals  
15  
16 without CKD.  
17  
18

19  
20  
21 The study selection process was conducted by two reviewers (MS, AR). Title screening was  
22  
23 followed by abstract and full paper review, where necessary. Any inter-reviewer  
24  
25 disagreements were resolved by a third reviewer (PM).  
26  
27

### 28 *Data extraction*

29  
30 As recommended by the Cochrane Handbook<sup>13</sup>, data were extracted in a Population,  
31  
32 Exposure, Comparator, Outcomes (PECO) approach:  
33  
34

35  
36 Population: We extracted data on the characteristics of study populations: country, sample  
37  
38 size, follow-up time and setting i.e. CKD, HD, PD, renal transplant and conservative care.  
39

40  
41 Exposure: We extracted the Multimorbidity Measure used in each study and whether LTCs  
42  
43 were categorised into different types for analysis.  
44  
45

46  
47 Comparator: We extracted the details provided of comparator groups i.e. patients with CKD  
48  
49 with less than two LTCs. We did not count CKD as an LTC.  
50

51  
52 Outcomes: We extracted details of the statistical analyses employed to evaluate the  
53  
54 relationship between Multimorbidity Measure and outcomes. Risks were expressed as effect  
55  
56 sizes with 95% confidence intervals, where available.  
57  
58  
59  
60

## *Data synthesis and analysis*

Results were presented in a narrative format. Where possible, fixed effects meta-analysis was performed for the primary outcome, all-cause mortality. Quantification of statistical heterogeneity was assessed by means of  $I^2$ , which shows the percentage of total variation across studies due to heterogeneity<sup>13</sup>. These analyses were carried out using RevMan Version 5.3 (The Cochrane Collaboration, Copenhagen, Denmark). Meta-analysis was limited by heterogeneous methodologies: variable Multimorbidity Measures, use of effect sizes (Hazard ratios (HRs), Risk ratios (RRs), Kaplan Meier curves) and the use of multimorbidity as a continuous and categorical variable. We therefore performed meta-analysis where several studies used similar methodologies. Data on numbers of deceased patients were not available for all studies and so we contacted study authors for their primary data. Where necessary and possible, we calculated RRs for studies, comparing patients with multimorbidity to those without multimorbidity. HRs could not be calculated as there were no individual time-to-event data.

## *Quality appraisal*

Two researchers conducted quality appraisal independently (MS, AR). Studies were assessed using an adapted Newcastle-Ottawa quality assessment scale (NOS), as informed by the Cochrane Handbook<sup>13</sup> (see Supplementary File 2). Studies were not excluded based on quality appraisal.

## **Results**

### *Search results*

Figure 1 demonstrates the literature search flow. After the removal of duplicate papers, 1852 papers were identified. 1756 papers were excluded as they were not relevant and so 96 full papers were screened and 26 papers met our eligibility criteria and were included in the review<sup>14-39</sup>.

## Study characteristics

Table 1 lists the characteristics of the 26 included studies. The studies were published between 1995 and 2019 and all used a cohort design. The size of populations was between 69 and 821,334. Fourteen studies examined subjects predominantly on dialysis<sup>14, 16-21, 24, 26, 29, 32, 34, 32, 39</sup>; five included patients with CKD stages 3 to 5<sup>15, 23, 23, 33, 35</sup> including two with mild CKD<sup>23, 33</sup>; two involved patients with CKD stage 5 including those not on RRT or conservative care<sup>28, 30</sup>; two included those receiving conservative care<sup>22, 37</sup>; three included renal transplant recipients<sup>25, 31, 38</sup>.

Table 2 shows the number of studies using each Multimorbidity Measure and how the corresponding effect sizes were presented: as a categorical or a continuous variable. In addition to these, three studies examined more than one Multimorbidity Measure: comparing how effectively each measure predicted outcomes<sup>21, 26, 36</sup>. Ten studies used the Charlson Comorbidity Index (CCI) or a modification of this scale (mCCI)<sup>14, 16, 24, 25, 29, 30, 32, 34, 38, 39</sup>. Seven studies used the number of LTCs i.e. condition count<sup>15, 22, 23, 27, 28, 35, 37</sup>. Two studies used the Stoke comorbidity grade, which uses condition count to divide patients into low, intermediate and high grades<sup>19, 20</sup>. Two studies used the Comorbidity severity score<sup>17, 18</sup>. One study compared those with CKD, diabetes and heart failure to those with just CKD and heart failure<sup>33</sup>. One study used the Kidney Transplant Morbidity Index<sup>31</sup>.

All studies reported the effect of multimorbidity on all-cause mortality. Five studies reported the effect of multimorbidity on hospitalisation<sup>14, 18, 33-35</sup> and four on renal progression<sup>25, 27, 31, 38</sup>. One study reported the effect of multimorbidity on heart failure hospitalisation and cardiovascular death<sup>33</sup> and one study reported the effect of multimorbidity on myocardial infarction<sup>35</sup>. Twelve studies expressed effect sizes using multimorbidity as a categorical variable<sup>15-17, 23, 25, 27, 31-33, 35, 38, 39</sup>, nine as a continuous variable<sup>14, 18-20, 24, 28, 29, 34, 37</sup> and one as both<sup>30</sup>. One study gave a narrative comparison of groups<sup>22</sup> and two used Kaplan-Meier

1  
2 curves<sup>26, 36</sup>. Two studies categorised LTCs into types: both used concordant and discordant  
3  
4 as types and one also specified mental health and chronic pain LTCs<sup>15, 35</sup>.

### 7 *Main findings*

8  
9 The results of the included studies were summarised in Supplementary File 3. Unadjusted  
10  
11 HRs were quoted as adjusted HRs were not available for all studies. Where multimorbidity  
12  
13 was used as a categorical variable, 12 of 13 studies found that patients with multimorbidity  
14  
15 had higher rates of mortality than patients without multimorbidity. In the one study that did  
16  
17 not detect a difference, Lee *et al*'s primary outcome was renal progression<sup>27</sup>. For all-cause  
18  
19 mortality, the authors provided event rates and Kaplan Meier Curves but there were no HRs  
20  
21 with adjustments for confounding variables.  
22  
23

24  
25 Where multimorbidity was used as a continuous variable, 10 of 11 studies found that with  
26  
27 each increase in Multimorbidity Measure, all-cause mortality was higher. In the one study to  
28  
29 not detect a difference, Ellam *et al* was a study of just 69 conservatively-managed patients<sup>22</sup>.

30  
31 Of the four studies that reported renal progression, three were in renal transplant  
32  
33 recipients<sup>25, 30, 31</sup>. All four studies demonstrated higher rates of renal progression in patients  
34  
35 with multimorbidity (HRs from each study 2.97 (1.53-5.76), 2.44 (1.19-5.02), 3.11 (2.55-  
36  
37 3.80), 1.42 (1.02-1.97). Renal progression was defined by graft loss or RRT initiation and  
38  
39 one paper reported significant annual reductions in eGFR by increasing number of LTCs<sup>27</sup>.  
40  
41 Five studies reported rates of hospitalisation and all of these identified an association  
42  
43 between multimorbidity and hospitalisation<sup>14, 18, 33-35</sup>.  
44  
45  
46  
47  
48

49  
50 One paper reported rates of Heart Failure Hospitalisation and Cardiovascular Death<sup>33</sup>:  
51  
52 patients with multimorbidity had higher rates of both outcomes than patients without  
53  
54 multimorbidity. One paper reported higher rates of Myocardial Infarction in patients with  
55  
56 multimorbidity<sup>35</sup>.  
57  
58  
59  
60

1  
2 Two papers described the influence of concordant and discordant LTCs on adverse  
3  
4 outcomes<sup>15, 35</sup>. These papers found that both types of LTC were associated with higher rates  
5  
6 of mortality. One paper found that the rates of outcomes were higher in patients with at least  
7  
8 one discordant LTC compared to patients with only concordant LTCs<sup>15</sup>. No association was  
9  
10 identified between mental health and chronic pain LTCs and Myocardial Infarction<sup>35</sup>.

### 13 *Meta-analysis*

15 We performed meta-analysis for all-cause mortality where several studies used comparable  
16  
17 methodologies. Figure 2 included studies that used CCI as a continuous variable,  
18  
19 demonstrating that with each increase in CCI, the risk of mortality was higher (Total HR 1.31  
20  
21 (95% confidence interval 1.27-1.36)). Figure 3 included studies that used condition count as  
22  
23 a categorical variable: demonstrating that patients with multimorbidity were at higher risk of  
24  
25 mortality compared to patients without multimorbidity (Total RR 2.28 (95% confidence  
26  
27 interval 1.81-2.88)). There was considerable statistical heterogeneity in the studies included  
28  
29 in each meta-analysis ( $I^2$  97% in figure 2 and 78% in figure 3).

### 34 *Risk of bias (See Supplementary File 4)*

36 All studies selected patients with and without multimorbidity from the same cohort and used  
37  
38 either secure medical records or structured interviews to collect data. Most studies included  
39  
40 just one group of patients with CKD such as HD patients and only three studies included  
41  
42 patients with a true range of mild to severe CKD<sup>15, 27, 35</sup>. All but two studies controlled for  
43  
44 factors such as ischaemic heart disease, age or diabetes<sup>17, 22</sup>. Only one study made a  
45  
46 statement about subjects who were lost to follow-up<sup>26</sup>. However, as all the studies were  
47  
48 based on health care databases, it is reasonable to assume complete or near-complete  
49  
50 follow-up. All studies followed up patients for more than one year, but there was variation in  
51  
52 the average length of follow-up (from 13.1 to 81.6 months). Four studies did not specify the  
53  
54 average follow-up time but from their survival analyses, it was clear that patients were  
55  
56 followed up for at least one year<sup>25, 30, 36, 39</sup>.

1  
2 The NOS score evaluation of each study was between five and seven stars. The two studies  
3  
4 that did not control for confounding factors were “poor” quality as per Agency for Healthcare  
5  
6 Research and Quality standards<sup>17, 22, 40</sup>. The remainder were “good” quality<sup>14-16, 18-21, 23-39</sup>.  
7  
8

## 9 **Discussion**

10  
11 To the best of our knowledge, this is the first systematic review and meta-analysis to  
12  
13 synthesise the existing evidence on the effects of multimorbidity specific to patients with  
14  
15 CKD. It is increasingly recognised that multimorbidity and the management of patients with  
16  
17 disease clusters are challenging problems<sup>41</sup>. The medical profession has been given a  
18  
19 mandate to improve the care of patients affected by multimorbidity and to do so, improving  
20  
21 our understanding of the issues will be fundamental. Multimorbidity has been studied in the  
22  
23 general population, with clear associations reported between it and high rates of mortality<sup>42</sup>.  
24  
25 It is time for researchers to build a body of evidence about patients with kidney disease. Our  
26  
27 review demonstrates that for patients with CKD, multimorbidity is associated with high rates  
28  
29 of mortality, and the risk is higher with increasing numbers of LTCs. Unfortunately, the  
30  
31 literature provides little detail beyond this association. Of the papers in the review, only two  
32  
33 categorised LTCs and studied whether the type of LTCs influenced outcomes. Tonelli *et al*  
34  
35 and Bowling *et al* found that concordant LTCs such as diabetes were associated with high  
36  
37 rates of mortality, but so were discordant or unrelated LTCs like cancer and depression<sup>15</sup>.  
38  
39 <sup>35</sup>. Bowling *et al* found that the presence of one or more discordant LTC conferred higher  
40  
41 risk compared to patients with only concordant LTCs. This suggests that there are groups  
42  
43 of patients in whom it is not just the number but also the type of LTCs that puts them at  
44  
45 elevated risk. Further research is needed into what patterns or clusters of disease exist to  
46  
47 help clinicians understand the risks faced by patients with CKD and multimorbidity.  
48  
49  
50  
51  
52  
53

54  
55 Patients require clinicians to help with their overall health and quality of life, not just the  
56  
57 status of individual LTCs. As seen in the Standardized Outcomes in  
58  
59 ~~MINI~~(SONG-HD) initiative, patients usually wish to understand the  
60

1 risks they face. However, there is often a mismatch between the outcomes regarded as  
2 important by patients to those emphasised in clinical guidelines<sup>43, 44</sup>. It is therefore  
3  
4  
5  
6 imperative that we consider patient-oriented outcomes when studying multimorbidity and  
7  
8 ensure that research leads to improvements in care for patients. A limitation of our review is  
9  
10 that we did not summarise outcomes prioritised by patients. The merit in investigating  
11  
12 multimorbidity in patients with CKD will be that patients and clinicians will have an improved  
13  
14 understanding of the risks they face. They will therefore be able to prioritise particular  
15  
16 interventions such as cardiovascular risk factor modification and vascular access creation.  
17  
18

19  
20 Despite the methodological and clinical heterogeneity of the studies in our review, the  
21  
22 findings are consistent with existing literature<sup>11</sup>. We have confirmed associations between  
23  
24 multimorbidity and adverse clinical outcomes in RRT and non-RRT settings, and in a range  
25  
26 of countries. 21 of 26 studies included patients with advanced CKD including those on RRT.  
27  
28 However, it should be noted that there was no information available from low or middle  
29  
30 income countries. Mild to moderate CKD was also under-represented, despite this  
31  
32 constituting 99% of the patients with CKD<sup>45</sup>. Multimorbidity in patients with CKD from low  
33  
34 and middle income countries and in those with mild to moderate CKD should therefore be  
35  
36 targets for future research. Only two studies assessed the influence of multimorbidity on  
37  
38 cardiovascular outcomes<sup>33, 35</sup>. Cardiovascular morbidity and mortality is the most significant  
39  
40 risk for patients with CKD and many of the LTCs that occur in patients with CKD are risk  
41  
42 factors for cardiovascular events<sup>10</sup>. Further research is therefore needed to explore how  
43  
44 multimorbidity influences cardiovascular events in patients with CKD. Of the four studies  
45  
46 that examined the influence of multimorbidity on renal progression, all but one were in  
47  
48 patients with renal transplants. The study in non-transplant patients identified an association  
49  
50 between multimorbidity and renal progression<sup>27</sup>. This risk is a significant one, particularly for  
51  
52 the patients who develop the need for RRT. Many patient cohorts around the world have  
53  
54  
55  
56  
57  
58  
59  
60

1  
2 ample follow-up data and so the influence of multimorbidity on renal progression in non-  
3  
4 transplant cohorts should be studied in greater detail.  
5

6  
7 The studies included in our review are heterogenous. Clinical heterogeneity is evident in the  
8  
9 range of populations studied: stage 3 CKD, HD, PD, transplant and conservative care. There  
10  
11 are high levels of methodological and statistical heterogeneity. There is no consensus as to  
12  
13 which Multimorbidity Measure should be used, and which measure is the most effective at  
14  
15 predicting adverse outcomes<sup>46</sup>. CCI was the most commonly used measure, although a  
16  
17 number of modifications have been made for use in populations with CKD. Three studies  
18  
19 included in this review compared different Multimorbidity Measures. CCI was found to  
20  
21 effectively predict mortality risk, with other scoring systems performing comparably and  
22  
23 none superior to the rest. Although our work demonstrates that various Multimorbidity  
24  
25 Measures are associated with adverse clinical outcomes, we have not identified the best  
26  
27 Multimorbidity Measure for risk prediction.  
28  
29  
30  
31

32  
33 It has been recognised that there are fewer randomised controlled trials (RCTs) to assess  
34  
35 the efficacy of interventions in patients with CKD than in other medical specialties and that  
36  
37 patients with CKD are often excluded from RCTs<sup>47, 48</sup>. Furthermore, patients with advanced  
38  
39 CKD that are included in RCTs are not representative of the wider population of those with  
40  
41 CKD<sup>49</sup>. Similar observations have been made in other fields, whereby subjects with  
42  
43 multimorbidity are underrepresented in trials of novel interventions<sup>50</sup>. Therefore, to improve  
44  
45 outcomes for patients with CKD, both epidemiological studies and RCTs need to account  
46  
47 for the range of multimorbidity in patients with CKD. A strength of our review is that it brings  
48  
49 together information about the effects of multimorbidity in patients with CKD from various  
50  
51 settings to create a comprehensive picture of the effects on different outcomes. Although  
52  
53 the studies are challenging to summarise given the heterogeneity, the data are ample and  
54  
55 clinically acceptable and therefore likely to be correct. Meta-analysis was performed with  
56  
57 data from only 10 studies. The data from 16 studies, including those with large sample sizes,  
58  
59  
60



1  
2 therefore did not contribute to full data analysis. If a uniform Multimorbidity Measure were  
3  
4 agreed and established in guidelines, the comparability and synthesis of data in future would  
5  
6 be improved. The evaluation of the effects of types of LTCs on outcomes was limited  
7  
8 because only two studies examined this issue. A key focus of research should therefore be  
9  
10 what patterns of multimorbidity or disease clusters exist in groups of patients with CKD.  
11  
12

13  
14 In conclusion, this review provides evidence of associations between multimorbidity and  
15  
16 heightened risk of adverse clinical outcomes in patients with CKD. Our findings emphasise  
17  
18 the need for further research into the details of how multimorbidity influences different  
19  
20 outcomes. In particular, evidence gaps exist for patients with mild to moderate CKD, for  
21  
22 outcomes other than mortality such as renal progression and cardiovascular events, for  
23  
24 patients with CKD from low and middle income countries and for the patterns of  
25  
26 multimorbidity that contribute to heightened risk.  
27  
28  
29  
30  
31  
32  
33  
34  
35  
36  
37  
38  
39  
40  
41  
42  
43  
44  
45  
46  
47  
48  
49  
50  
51  
52  
53  
54  
55  
56  
57  
58  
59  
60

## Acknowledgements

We thank Paul Cannon of the University of Glasgow Library for assistance with the literature search. We used the MOOSE checklist when writing our report<sup>51</sup>.

## Funding

This research received no specific grant from any funding agency in the public, commercial or not-for-profit sectors

## Conflicts of Interest

The results presented in this paper have not been published previously in whole or part.

Michael Sullivan, Alastair Rankin, Bhautesh Jani and Frances Mair have no conflicts of interest. Patrick Mark reports personal fees and non-financial support from Vifor, personal fees from Astrazeneca, grants from Boehringer Ingelheim, personal fees and non-financial support from Pharmacosmos, personal fees from Janssen, personal fees from Novartis, personal fees from Pfizer, personal fees from Bristol Myers Squibb, personal fees and non-financial support from Napp, outside the submitted work.

## Author Contributions

All authors contributed to conceptualisation, appraisal of results, writing (review and editing) and manuscript approval. MS, AR and PM performed data analysis extraction. MS and AR performed data extraction. MS prepared the original manuscript draft.

## Word Count

3282 words.

## Figure Legends

Figure 1. PRISMA flow diagram

Figure 2. Mortality risk for each increase in CCI (Generic Inverse Variance Method, Fixed Effects Model)

Figure 3. Mortality risk for patients with multimorbidity (Mantel-Haenszel Method, Fixed Effects Model)

## Data availability statement

All relevant data are included in the article or uploaded as supplementary information.

## Patient and public involvement

No patients involved.

## Tables

| Reference                      | Country     | Setting | Sample size | Average follow-up (months) | Outcome(s) |                   |
|--------------------------------|-------------|---------|-------------|----------------------------|------------|-------------------|
|                                |             |         |             |                            | Mortality  | Others            |
| <b>DIALYSIS</b>                |             |         |             |                            |            |                   |
| <b>Beddhu 2000</b>             | USA         | HD/PD   | 268         | 13.1                       | ✓          | Hospitalisation   |
| <b>Chae 2010</b>               | South Korea | HD      | 456         | 40.6                       | ✓          |                   |
| <b>Chandna 1999</b>            | UK          | HD/PD   | 292         | 63                         | ✓          | Hospitalisation   |
| <b>Chandna 2010</b>            | UK          | CC/RRT  | 844         | 58.7*                      | ✓          |                   |
| <b>Davies 1995</b>             | UK          | PD      | 97          | 30                         | ✓          |                   |
| <b>Davies 2002</b>             | UK          | PD      | 303         | 72.0*                      | ✓          |                   |
| <b>Di Iorio 2004</b>           | Italy       | HD      | 515         | 15                         | ✓          |                   |
| <b>Fried 2001</b>              | USA         | PD      | 268         | 16.9                       | ✓          |                   |
| <b>Hemmelgarn 2003</b>         | Canada      | HD/PD   | 237         | 26.3                       | ✓          |                   |
| <b>Park 2015</b>               | South Korea | HD      | 24738       | 47.7                       | ✓          |                   |
| <b>Rattanasompattikul 2012</b> | USA         | HD      | 893         | 72                         | ✓          |                   |
| <b>Shum 2013</b>               | China       | PD/CC   | 157         | 23.5                       | ✓          | Hospitalisation   |
| <b>van Manen 2002</b>          | Netherlands | HD/PD   | 589         | NK                         | ✓          |                   |
| <b>Wu 2013</b>                 | Taiwan      | HD/PD   | 79645       | NK                         | ✓          |                   |
| <b>NON-RRT CKD</b>             |             |         |             |                            |            |                   |
| <b>Bowling 2016</b>            | USA         | CKD 3-5 | 821334      | 81.6                       | ✓          |                   |
| <b>Fraser 2015</b>             | UK          | CKD 3   | 1741        | 43.2                       | ✓          |                   |
| <b>Lee 2018</b>                | Taiwan      | CKD 3-5 | 1463        | 76.7                       | ✓          | Renal progression |
| <b>Lhotta 2003</b>             | Austria     | CKD 5   | 75          | 48                         | ✓          |                   |

|                          |        |                   |        |       |   |                                               |
|--------------------------|--------|-------------------|--------|-------|---|-----------------------------------------------|
| <b>Ritchie 2009</b>      | USA    | CKD/Heart failure | 1974   | 32.6  | ✓ | Hospitalisation, HF hospitalisation, CV death |
| <b>Tonelli 2015</b>      | Canada | CKD 3-5           | 530771 | 48    | ✓ | Hospitalisation, Myocardial Infarction        |
| <b>TRANSPLANT</b>        |        |                   |        |       |   |                                               |
| <b>Fernandez 2019</b>    | USA    | Tx assessment     | 2086   | NK    | ✓ |                                               |
| <b>Grosso 2012</b>       | Italy  | Tx recipients     | 223    | NK    | ✓ | Renal Progression                             |
| <b>Pieloch 2015</b>      | USA    | Tx recipients     | 100261 | 36    | ✓ | Renal Progression                             |
| <b>Wu 2005</b>           | USA    | Tx recipients     | 715    | 40.2  | ✓ | Renal Progression                             |
| <b>CONSERVATIVE CARE</b> |        |                   |        |       |   |                                               |
| <b>Ellam 2008</b>        | UK     | CC                | 69     | 21*   | ✓ |                                               |
| <b>Wong 2007</b>         | UK     | CC                | 73     | 23.4* | ✓ |                                               |

Table 1. Study characteristics. HD, haemodialysis; PD, peritoneal dialysis; CKD, chronic kidney disease; RRT, renal replacement therapy; CC, conservative care; Tx, transplant; NK, Not Known. \*Median survival

| Variable Type | Multimorbidity Measure: number of studies |                 |     |      |                                                              |
|---------------|-------------------------------------------|-----------------|-----|------|--------------------------------------------------------------|
|               | CCI                                       | Condition Count | CSS | KTMI | Heart failure and CKD versus Heart failure, CKD and diabetes |
| Categorical   | 6                                         | 4               | 1   | 1    | 1                                                            |
| Continuous    | 6                                         | 4               | 1   | 0    | 0                                                            |

Table 2. Studies using each Multimorbidity measure. CCI, Charlson Comorbidity Index; CSS, Comorbidity Severity Score; KTMI, Kidney Transplant Morbidity Index.

## References

- 1 Multimorbidity: clinical assessment and management: National Institute for Health and Care Excellence (NICE); 2017. 23 p.
- 2 Barnett, K., S. W. Mercer, M. Norbury, et al. (2012). "Epidemiology of multimorbidity and implications for health care, research, and medical education: a cross-sectional study." *The Lancet* **380**(9836): 37-43.
- 3 Harris, M. F., S. Dennis and M. Pillay (2013). "Multimorbidity: negotiating priorities and making progress." *Aust Fam Physician* **42**(12): 850-854.
- 4 Tinetti, M. E., T. R. Fried and C. M. Boyd (2012). "Designing health care for the most common chronic condition--multimorbidity." *Jama* **307**(23): 2493-2494.
- 5 Mair, F. S. and C. R. May (2014). "Thinking about the burden of treatment." *Bmj* **349**: g6680.
- 6 Tonelli, M., N. Wiebe, B. J. Manns, et al. (2018). "Comparison of the Complexity of Patients Seen by Different Medical Subspecialists in a Universal Health Care System." *JAMA Netw Open* **1**(7): e184852.
- 7 Coresh, J. (2017). "Update on the Burden of CKD." **28**(4): 1020-1022, *ibid*.
- 8 Kassebaum, N. J., M. Arora, R. M. Barber, et al. (2016). "Global, regional, and national disability-adjusted life-years (DALYs) for 315 diseases and injuries and healthy life expectancy (HALE), 1990-2015: a systematic analysis for the Global Burden of Disease Study 2015." *The Lancet* **388**(10053): 1603-1658.
- 9 van der Velde, M., K. Matsushita, J. Coresh, et al. (2011). "Lower estimated glomerular filtration rate and higher albuminuria are associated with all-cause and cardiovascular mortality. A collaborative meta-analysis of high-risk population cohorts." *Kidney Int* **79**(12): 1341-1352.
- 10 Matsushita, K., J. Coresh, Y. Sang, et al. (2015). "Estimated glomerular filtration rate and albuminuria for prediction of cardiovascular outcomes: a collaborative meta-analysis of individual participant data." *Lancet Diabetes Endocrinol* **3**(7): 514-525.
- 11 Fraser, S. D. and M. W. Taal (2016). "Multimorbidity in people with chronic kidney disease: implications for outcomes and treatment." *Curr Opin Nephrol Hypertens* **25**(6): 465-472.
- 12 Shamseer, L., D. Moher, M. Clarke, et al. (2015). "Preferred reporting items for systematic review and meta-analysis protocols (PRISMA-P) 2015: elaboration and explanation." **349**: g7647.
- 13 Cumpston, M., T. Li, M. J. Page, et al. (2019). "Updated guidance for trusted systematic reviews: a new edition of the Cochrane Handbook for Systematic Reviews of Interventions." *Cochrane Database Syst Rev* **10**: Ed000142.
- 14 Beddhu, S., F. J. Bruns, M. Saul, P. Seddon and M. L. Zeidel (2000). "A simple comorbidity scale predicts clinical outcomes and costs in dialysis patients." *Am J Med* **108**(8): 609-613.
- 15 Bowling, C. B., L. Plantinga, L. S. Phillips, et al. (2017). "Association of Multimorbidity with Mortality and Healthcare Utilization in Chronic Kidney Disease." *J Am Geriatr Soc* **65**(4): 704-711.
- 16 Chae, J. W., C. S. Song, H. Kim, et al. (2011). "Prediction of mortality in patients undergoing maintenance hemodialysis by Charlson Comorbidity Index using ICD-10 database." *Nephron Clin Pract* **117**(4): c379-384.
- 17 Chandna, S. M., M. Da Silva-Gane, C. Marshall, et al. (2011). "Survival of elderly patients with stage 5 CKD: comparison of conservative management and renal replacement therapy." *Nephrol Dial Transplant* **26**(5): 1608-1614.

- 1  
2
- 
- 3 18 Chandna, S. M., J. Schulz, C. Lawrence, R. N. Greenwood and K. Farrington (1999). "Is  
4 there a rationale for rationing chronic dialysis? A hospital based cohort study of factors  
5 affecting survival and morbidity." *Bmj* **318**(7178): 217-223.
- 6 19 Davies, S. J., L. Phillips, P. F. Naish and G. I. Russell (2002). "Quantifying comorbidity  
7 in peritoneal dialysis patients and its relationship to other predictors of survival." *Nephrol*  
8 *Dial Transplant* **17**(6): 1085-1092.
- 9 20 Davies, S. J., L. Russell, J. Bryan, L. Phillips and G. I. Russell (1995). "Comorbidity,  
10 urea kinetics, and appetite in continuous ambulatory peritoneal dialysis patients: their  
11 interrelationship and prediction of survival." *Am J Kidney Dis* **26**(2): 353-361.
- 12 21 Di Iorio, B., N. Cillo, M. Cirillo and N. G. De Santo (2004). "Charlson Comorbidity Index  
13 is a predictor of outcomes in incident hemodialysis patients and correlates with phase  
14 angle and hospitalization." *Int J Artif Organs* **27**(4): 330-336.
- 15 22 Ellam, T., M. El-Kossi, K. C. Prasanth, M. El-Nahas and A. Khwaja (2009).  
16 "Conservatively managed patients with stage 5 chronic kidney disease--outcomes from a  
17 single center experience." *Qjm* **102**(8): 547-554.
- 18 23 Fraser, S. D., P. J. Roderick, C. R. May, et al. (2015). "The burden of comorbidity in  
19 people with chronic kidney disease stage 3: a cohort study." *BMC Nephrol* **16**: 193.
- 20 24 Fried, L., J. Bernardini and B. Piraino (2001). "Charlson comorbidity index as a predictor  
21 of outcomes in incident peritoneal dialysis patients." *Am J Kidney Dis* **37**(2): 337-342.
- 22 25 Grosso, G., D. Corona, A. Mistretta, et al. (2012). "Predictive value of the Charlson  
23 comorbidity index in kidney transplantation." *Transplant Proc* **44**(7): 1859-1863.
- 24 26 Hemmelgarn, B. R., B. J. Manns, H. Quan and W. A. Ghali (2003). "Adapting the  
25 Charlson Comorbidity Index for use in patients with ESRD." *Am J Kidney Dis* **42**(1): 125-  
26 132.
- 27 27 Lee, W. C., Y. T. Lee, L. C. Li, et al. (2018). "The Number of Comorbidities Predicts  
28 Renal Outcomes in Patients with Stage 3(-)5 Chronic Kidney Disease." *J Clin Med* **7**(12).
- 29 28 Lhotta, K., M. Zobl, G. Mayer and F. Kronenberg (2003). "Late referral defined by renal  
30 function: association with morbidity and mortality." *J Nephrol* **16**(6): 855-861.
- 31 29 Park, J. Y., M. H. Kim, S. S. Han, et al. (2015). "Recalibration and validation of the  
32 Charlson comorbidity index in Korean incident hemodialysis patients." *PLoS One* **10**(5):  
33 e0127240.
- 34 30 Perez Fernandez, M., P. Martinez Miguel, H. Ying, et al. (2019). "Comorbidity, Frailty,  
35 and Waitlist Mortality among Kidney Transplant Candidates of All Ages." *Am J Nephrol*  
36 **49**(2): 103-110.
- 37 31 Pieloch, D., V. Dombrovskiy, A. J. Osband, et al. (2015). "The Kidney Transplant  
38 Morbidity Index (KTMI): a simple prognostic tool to help determine outcome risk in kidney  
39 transplant candidates." *Prog Transplant* **25**(1): 70-76.
- 40 32 Rattanasompattikul, M., U. Feroze, M. Z. Molnar, et al. (2012). "Charlson comorbidity  
41 score is a strong predictor of mortality in hemodialysis patients." *Int Urol Nephrol* **44**(6):  
42 1813-1823.
- 43 33 Ritchie, C., O. J. Ekundayo, M. Muchimba, et al. (2009). "Effects of diabetes mellitus in  
44 patients with heart failure and chronic kidney disease: a propensity-matched study of  
45 multimorbidity in chronic heart failure." *Int J Cardiol* **134**(3): 330-335.
- 46 34 Shum, C. K., K. F. Tam, W. L. Chak, et al. (2014). "Outcomes in older adults with stage  
47 5 chronic kidney disease: comparison of peritoneal dialysis and conservative  
48 management." *J Gerontol A Biol Sci Med Sci* **69**(3): 308-314.
- 49 35 Tonelli, M., N. Wiebe, B. Guthrie, et al. (2015). "Comorbidity as a driver of adverse  
50 outcomes in people with chronic kidney disease." *Kidney Int* **88**(4): 859-866.
- 51 36 van Manen, J. G., J. C. Korevaar, F. W. Dekker, et al. (2002). "How to adjust for  
52 comorbidity in survival studies in ESRD patients: a comparison of different indices." *Am J*  
53 *Kidney Dis* **40**(1): 82-89.
- 54  
55  
56  
57  
58  
59  
60

- 1  
2  
3  
4  
5  
6  
7  
8  
9  
10  
11  
12  
13  
14  
15  
16  
17  
18  
19  
20  
21  
22  
23  
24  
25  
26  
27  
28  
29  
30  
31  
32  
33  
34  
35  
36  
37  
38  
39  
40  
41  
42  
43  
44  
45  
46  
47  
48  
49  
50  
51  
52  
53  
54  
55  
56  
57  
58  
59  
60
- <sup>37</sup> Wong, C. F., M. McCarthy, M. L. Howse and P. S. Williams (2007). "Factors affecting survival in advanced chronic kidney disease patients who choose not to receive dialysis." *Ren Fail* **29**(6): 653-659.
- <sup>38</sup> Wu, C., I. Evans, R. Joseph, et al. (2005). "Comorbid conditions in kidney transplantation: association with graft and patient survival." *J Am Soc Nephrol* **16**(11): 3437-3444.
- <sup>39</sup> Wu, P. H., Y. T. Lin, T. C. Lee, et al. (2013). "Predicting mortality of incident dialysis patients in Taiwan--a longitudinal population-based study." *PLoS One* **8**(4): e61930.
- <sup>40</sup> AHRQ Customer Service Standards. October 2018. Agency for Healthcare Research and Quality, Rockville, MD. <https://www.ahrq.gov/contact/standards.html>
- <sup>41</sup> Whitty, C. J. M., C. MacEwen, A. Goddard, et al. (2020). "Rising to the challenge of multimorbidity." *BMJ* **368**: l6964.
- <sup>42</sup> Jani, B. D., P. Hanlon, B. I. Nicholl, et al. (2019). "Relationship between multimorbidity, demographic factors and mortality: findings from the UK Biobank cohort." *BMC Medicine* **17**(1): 74.
- <sup>43</sup> Evangelidis, N., A. Tong, B. Manns, et al. (2017). "Developing a Set of Core Outcomes for Trials in Hemodialysis: An International Delphi Survey." *Am J Kidney Dis* **70**(4): 464-475.
- <sup>44</sup> Tong, A., B. Manns, B. Hemmelgarn, et al. (2017). "Establishing Core Outcome Domains in Hemodialysis: Report of the Standardized Outcomes in Hemodialysis (SONG-HD) Consensus Workshop." *Am J Kidney Dis*. \_\_\_\_\_ **69**(1): 97-107.
- <sup>45</sup> Coresh, J., E. Selvin, L. A. Stevens, et al. (2007). "Prevalence of chronic kidney disease in the United States." *Jama* **298**(17): 2038-2047.
- <sup>46</sup> Stirland, L. E., L. González-Saavedra, D. S. Mullin, et al. (2020). "Measuring multimorbidity beyond counting diseases: systematic review of community and population studies and guide to index choice." *BMJ* **368**: m160.
- <sup>47</sup> Konstantinidis, I., G. N. Nadkarni, R. Yacoub, et al. (2016). "Representation of Patients With Kidney Disease in Trials of Cardiovascular Interventions: An Updated Systematic Review." *JAMA Intern Med* **176**(1): 121-124.
- <sup>48</sup> Smyth, B., A. Haber, K. Trongtrakul, et al. (2019). "Representativeness of Randomized Clinical Trial Cohorts in End-stage Kidney Disease: A Meta-analysis." *Ibid*.
- <sup>49</sup> Strippoli, G. F., J. C. Craig and F. P. Schena (2004). "The number, quality, and coverage of randomized controlled trials in nephrology." *J Am Soc Nephrol* **15**(2): 411-419.
- <sup>50</sup> Hanlon, P., L. Hannigan, J. Rodriguez-Perez, et al. (2019). "Representation of people with comorbidity and multimorbidity in clinical trials of novel drug therapies: an individual-level participant data analysis." *BMC Medicine* **17**(1): 201.
- <sup>51</sup> Stroup, D.F., Berlin, J.A., Morton, S.C. et al. Meta-analysis of observational studies in epidemiology: a proposal for reporting. Meta-analysis Of Observational Studies in Epidemiology (MOOSE) group. *JAMA*. 2000; **283**(15):2008-2012.

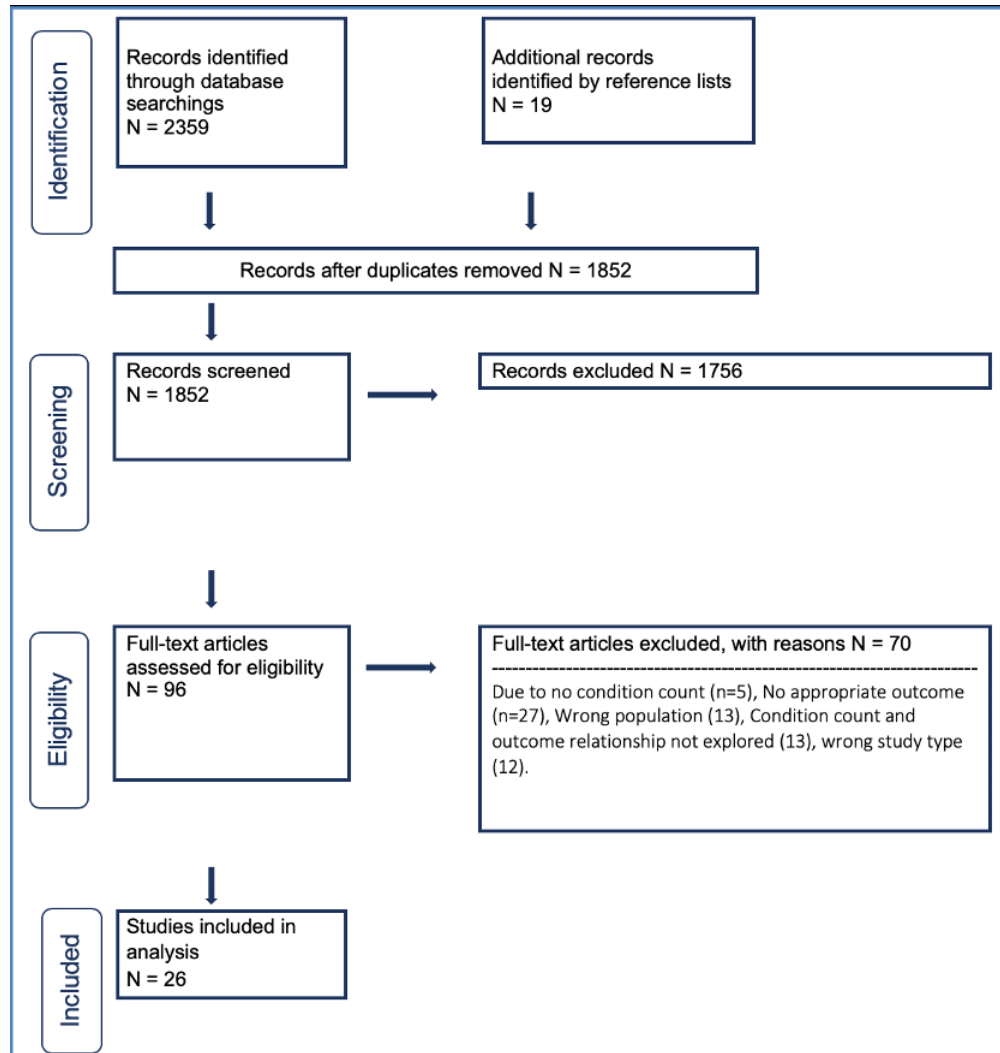

PRISMA flow diagram



1  
2  
3  
4  
5  
6  
7  
8  
9  
10  
11  
12  
13  
14  
15  
16  
17  
18  
19  
20  
21  
22  
23  
24  
25  
26  
27  
28  
29  
30  
31  
32  
33  
34  
35  
36  
37  
38  
39  
40  
41  
42  
43  
44  
45  
46  
47  
48  
49  
50  
51  
52  
53  
54  
55  
56  
57  
58  
59  
60

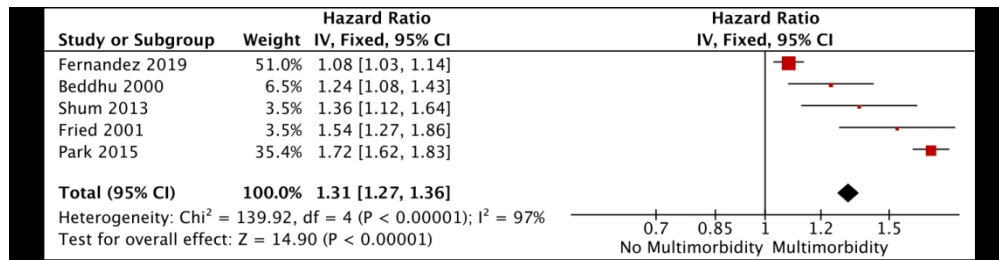

Mortality risk for Charlson Comorbidity Index as a continuous variable (Generic Inverse Variance Method, Fixed Effects Model)

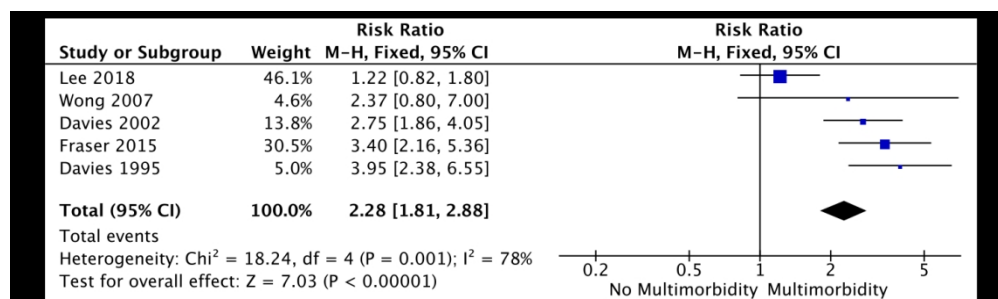

Mortality risk for patients with multimorbidity (Mantel-Haenszel Method, Fixed Effects Model)

! "##\$%&% ' ( ) \*+, - .\$/0, 1 ) ( ) 2) 3%, ! %) \*45,6%\* &3,

|                         |                                                                                                                                                                                                                                                                                                                                                                                                                                              |                                                                                                                                                                                                                                                                                                                                                                       |                                       |
|-------------------------|----------------------------------------------------------------------------------------------------------------------------------------------------------------------------------------------------------------------------------------------------------------------------------------------------------------------------------------------------------------------------------------------------------------------------------------------|-----------------------------------------------------------------------------------------------------------------------------------------------------------------------------------------------------------------------------------------------------------------------------------------------------------------------------------------------------------------------|---------------------------------------|
| <p>Subject headings</p> | <p>Chronic Kidney Failure<br/>Kidney Failure<br/>Chronic Renal Insufficiency<br/>Renal Insufficiency<br/>Kidney Disease<br/>Kidney Dysfunction<br/>Mild renal impairment<br/>Moderate renal impairment<br/>Severe renal impairment<br/>Subclinical renal impairment<br/>Renal replacement therapy<br/>Hemodialysis<br/>Peritoneal Dialysis<br/>Continuous Ambulatory<br/>Peritoneal Dialysis<br/>Kidney transplantation<br/>Kidney graft</p> | <p>Multimorbidity<br/>Multiple Chronic Conditions</p>                                                                                                                                                                                                                                                                                                                 | <p>Humans<br/>Adult</p>               |
| <p>Textwords</p>        | <p>Chronic kidney or chronic renal<br/>CKF, CKD, CRF or CRD<br/>Predialysis or pre-dialysis<br/>Renal failure or kidney failure<br/>Kidney disease<br/>Renal insufficiency*<br/>Hemodialysis or Haemodialysis<br/>Hemodiafiltration or<br/>haemodiafiltration<br/>Dialysis<br/>Endstage renal or endstage<br/>kidney<br/>Peritoneal dialysis<br/>CAPD or APD or CCPD or PD<br/>Kidney Transplant</p>                                         | <p>Multimorbid* or multi morbid<br/>Condition count<br/>Multiple condition or multicondition<br/>or multi condition<br/>Multiple disease or multidisease or<br/>multi disease<br/>Multiple disorder or multidisorder or<br/>multi disorder<br/>Multiple comorbidities or multiple co<br/>morbidities<br/>Discordant comorbidities or<br/>concordant comorbidities</p> | <p>Adult* or aged* or<br/>elderly</p> |

! "#\$%&% ' () \*+, - .%, 70, 89 : ; < ! 6=9, >, ? 66 < : <, @A<=B6C, < ! ! 9 ! ! D986, ! ; <=9,  
 Note: A study can be awarded a maximum of one star for each numbered item within the Selection and Outcome categories. A maximum of two stars can be given for Comparability

### Selection

- 1) Representativeness of the exposed cohort ie CKD with multimorbidity (MM)
  - a) truly representative of the average CKD/MM population in the community \*
  - b) somewhat representative of the average CKD/MM population in the community \*
  - c) selected group of users eg only one disease group
  - d) no description of the derivation of the cohort
- 2) Selection of the unexposed cohort ie CKD without MM
  - a) drawn from the same community as the exposed cohort \*
  - b) drawn from a different source
  - c) no description of the derivation of the non exposed cohort
  - d) no control group
- 3) Ascertainment of CKD/MM status
  - a) secure record (eg medical records) \*
  - b) structured interview \*
  - c) written self report
  - d) no description
- 4) Demonstration that outcomes were not present at start of study
  - a) yes \*
  - b) no

### Comparability

- 1) Comparability of cohorts on the basis of the design ie are exposed/non-exposed individuals matched or do the authors actively control for confounding factors?
  - a) study controls for ischaemic heart disease \*
  - b) study controls for additional factor(s) \*

Statements of no differences between groups or that differences were not statistically significant are not sufficient for establishing comparability.

### Outcomes

- 1) Assessment of outcome(s)
  - a) independent blind assessment \*
  - b) record linkage \*
  - c) self report
  - d) no description
- 2) Was follow-up long enough ie > 1 year
  - a) yes \*
  - b) no
- 3) Adequacy of follow up of cohorts
  - a) complete follow up - all subjects accounted for \*
  - b) subjects lost to follow up unlikely to introduce bias - small number lost to follow up, or description provided of those lost) \*
  - c) high lost to follow up rate and no description of those lost
  - d) no statement

Total stars /8

Supplementary File 3. Results from included studies

| Reference                                      | Effect size | CCI groups                                                                                                                                                                                                            | Effect size (95% CI) |
|------------------------------------------------|-------------|-----------------------------------------------------------------------------------------------------------------------------------------------------------------------------------------------------------------------|----------------------|
| <b>CATEGORICAL PRESENTATION OF EFFECT SIZE</b> |             |                                                                                                                                                                                                                       |                      |
| Chae 2010                                      | HRs         | <b>! "\$%&amp;' (&amp;)(# * *# ,&amp;)-&amp; . /01#</b>                                                                                                                                                               |                      |
|                                                |             | Quartile 1 (CCI 2)                                                                                                                                                                                                    | Ref                  |
|                                                |             | Quartile 2 (CCI 4-5)                                                                                                                                                                                                  | 9.22 (3.29-25.84)    |
|                                                |             | Quartile 3 (CCI 6)                                                                                                                                                                                                    | 16.77 (5.97-47.11)   |
|                                                |             | Quartile 4 (CCI 7-11)                                                                                                                                                                                                 | 22.37 (8.08-61.93)   |
|                                                |             | <b>2 "# * * #034/5 (- ' 6#&amp;60#&amp;' (# (-&amp; . 0%01#</b>                                                                                                                                                       |                      |
|                                                |             | Tertile 1 (CCI 2)                                                                                                                                                                                                     | Ref                  |
| Wu 2005                                        | HRs         | <b>* * #034/5 (- ' 6#&amp;60#</b>                                                                                                                                                                                     |                      |
|                                                |             | CCI < 5                                                                                                                                                                                                               | Ref                  |
|                                                |             | CCI ≥ 5                                                                                                                                                                                                               | 2.88 (1.90-4.37)     |
| Grosso 2012                                    | HRs         | <b>7 8 (-9-0 (# * * #</b>                                                                                                                                                                                             |                      |
|                                                |             | 1 point: myocardial infarction, heart failure, peripheral vascular disease, COPD, connective tissue disease or mild liver disease<br>2 points: diabetes mellitus, cerebrovascular accident, solid tumour or leukaemia |                      |
|                                                |             | CCI ≤ 1                                                                                                                                                                                                               | Ref                  |
| Rattanasompattikul 2012                        | HRs         | <b>* * #034/5 (- ' 6#&amp;60#&amp;' (#)0' &amp;/# (-10&amp;10</b>                                                                                                                                                     |                      |
|                                                |             | Quartile 1 (CCI 0)                                                                                                                                                                                                    | Ref                  |
|                                                |             | Quartile 2 (CCI 1-2)#                                                                                                                                                                                                 | 1.72 (1.26-2.36)     |
|                                                |             | Quartile 3 (CCI 3)                                                                                                                                                                                                    | 2.60 (1.13-3.26)     |
|                                                |             | Quartile 4 (CCI 4-9)#                                                                                                                                                                                                 | 3.40 (2.41-4.79)     |
| Wu 2013                                        | HRs         | <b>* * #034/5 (- ' 6#&amp;60</b>                                                                                                                                                                                      |                      |
|                                                |             | CCI ≤ 3                                                                                                                                                                                                               | Ref                  |
|                                                |             | CCI 4-6                                                                                                                                                                                                               | 2.49 (2.35-2.63)     |
|                                                |             | CCI 7-9                                                                                                                                                                                                               | 3.53 (3.34-3.73)     |
|                                                |             | CCI 10-12                                                                                                                                                                                                             | 3.66 (3.45-3.88)     |
|                                                |             | CCI 13-15                                                                                                                                                                                                             | 4.12 (3.84-4.42)     |
|                                                |             | CCI > 15                                                                                                                                                                                                              | 4.42 (4.02-4.86)     |

CONTINUOUS PRESENTATION OF EFFECT SIZES

|    |                                                         |               |                                                                                                                          |
|----|---------------------------------------------------------|---------------|--------------------------------------------------------------------------------------------------------------------------|
| 1  |                                                         |               |                                                                                                                          |
| 2  |                                                         |               |                                                                                                                          |
| 3  | Beddhu 2000                                             | HRs           | <b>78(-9-0(#* * #</b>                                                                                                    |
| 4  |                                                         |               | 1 point: coronary artery disease, heart failure, peripheral vascular disease, cerebrovascular disease, dementia, chronic |
| 5  |                                                         |               | pulmonary disease, connective tissue disorder, peptic ulcer disease, mild liver disease, diabetes                        |
| 6  |                                                         |               | 2 points: hemiplegia, moderate or severe renal disease, diabetes with end-organ damage, any tumour, leukaemia,           |
| 7  |                                                         |               | lymphoma                                                                                                                 |
| 8  |                                                         |               | 3 points: moderate or severe liver disease                                                                               |
| 9  |                                                         |               | 6 points: metastatic solid tumour, AIDS                                                                                  |
| 10 |                                                         |               | Each increase in CCI                                                                                                     |
| 11 |                                                         |               | 1.24 (1.11-1.39)#                                                                                                        |
| 12 | Fried 2001                                              | Relative risk | <b>\$%&amp;' (&amp;)(#* * #, &amp;)-&amp; . /01</b>                                                                      |
| 13 |                                                         |               | Each increase in CCI                                                                                                     |
| 14 |                                                         |               | 1.54 (1.36-1.74)                                                                                                         |
| 15 | Park 2015                                               | HRs           | <b>! "\$%&amp;' (&amp;)(#* * #, &amp;)-&amp; . /01</b>                                                                   |
| 16 |                                                         |               | Each increase in CCI                                                                                                     |
| 17 |                                                         |               | 1.42 (1.39-1.45)                                                                                                         |
| 18 |                                                         |               | <b>2"#78(-9-0(#* * #-'#-'4-(0'#: &amp;0 ; 8(-&amp;/&lt;1-1#=#&amp;%-0' %1#</b>                                           |
| 19 |                                                         |               | Details not provided                                                                                                     |
| 20 |                                                         |               | Each increase in CCI                                                                                                     |
| 21 |                                                         |               | 1.72 (1.66-1.78)                                                                                                         |
| 22 | Shum 2013                                               | HRs           | <b>&gt;\$#@#78(-9-0(#* * +</b>                                                                                           |
| 23 |                                                         |               | Each increase in CCI (PD group only)#                                                                                    |
| 24 |                                                         |               | 1.36 (1.18-1.56)                                                                                                         |
| 25 | CONTINUOUS AND CATEGORICAL PRESENTATION OF EFFECT SIZES |               |                                                                                                                          |
| 26 | Fernandez 2019                                          | HRs           | <b>&gt;\$#@#78(-9-0(#* * #</b>                                                                                           |
| 27 |                                                         |               | Each increase in CCI#                                                                                                    |
| 28 |                                                         |               | 1.08 (1.03-1.13)                                                                                                         |
| 29 |                                                         |               | Low comorbidity burden CCI 0-1                                                                                           |
| 30 |                                                         |               | Ref                                                                                                                      |
| 31 |                                                         |               | High comorbidity burden CCI ≥ 2                                                                                          |
| 32 |                                                         |               | 1.38 (1.01-1.89)                                                                                                         |

Results from studies using Charlson Comorbidity Index (CCI) as Multimorbidity Measure

| Reference                               | Effect size# | Conditions and groups#                                                                                                                                                                                                                                                                                                                                                                                            | Effect size (95% CI)# |
|-----------------------------------------|--------------|-------------------------------------------------------------------------------------------------------------------------------------------------------------------------------------------------------------------------------------------------------------------------------------------------------------------------------------------------------------------------------------------------------------------|-----------------------|
| CATEGORICAL PRESENTATION OF EFFECT SIZE |              |                                                                                                                                                                                                                                                                                                                                                                                                                   |                       |
| Bowling 2016                            | HRs          | 22 conditions: hypertension, hyperlipidemia, coronary heart disease, atrial fibrillation, heart failure, peripheral arterial disease, arthritis, osteoporosis, gout, diabetes, hypothyroidism, cancer, prostate cancer, anaemia, cerebrovascular disease, depression, dementia, epilepsy, Parkinson's disease, gastroesophageal reflux disease/peptic ulcer disease, benign prostatic hypertrophy and COPD/asthma |                       |
|                                         |              | 1                                                                                                                                                                                                                                                                                                                                                                                                                 | Ref                   |
|                                         |              | 2                                                                                                                                                                                                                                                                                                                                                                                                                 | 0.95 (0.93-0.97)      |
|                                         |              | 3                                                                                                                                                                                                                                                                                                                                                                                                                 | 1.03 (1.01-1.05)      |
|                                         |              | 4                                                                                                                                                                                                                                                                                                                                                                                                                 | 1.24 (1.21-1.26)      |
|                                         |              | 5                                                                                                                                                                                                                                                                                                                                                                                                                 | 1.43 (1.39-1.47)      |
|                                         |              | ≥ 6                                                                                                                                                                                                                                                                                                                                                                                                               | 1.72 (1.64-1.80)      |

|                                         |                        |                                                                                                                                                                                                                                                                                                                                                                                                                                                                                                                                                  |                                                   |
|-----------------------------------------|------------------------|--------------------------------------------------------------------------------------------------------------------------------------------------------------------------------------------------------------------------------------------------------------------------------------------------------------------------------------------------------------------------------------------------------------------------------------------------------------------------------------------------------------------------------------------------|---------------------------------------------------|
| Fraser<br>2015                          | HRs                    | 11 conditions: hypertension, diabetes, ischaemic heart disease, heart failure, peripheral vascular disease, cerebrovascular disease, chronic respiratory disorder, depression, chronic painful condition, thyroid disorder and anaemia                                                                                                                                                                                                                                                                                                           |                                                   |
|                                         |                        | 0-1                                                                                                                                                                                                                                                                                                                                                                                                                                                                                                                                              | Ref                                               |
|                                         |                        | 2                                                                                                                                                                                                                                                                                                                                                                                                                                                                                                                                                | 2.31 (1.36-3.94)                                  |
|                                         |                        | ≥ 3                                                                                                                                                                                                                                                                                                                                                                                                                                                                                                                                              | 4.58 (2.85-7.38)                                  |
| Lee 2018                                | 10-year survival rates | 12 conditions: diabetes, hypertension, gout, heart failure, ischemic heart disease, cerebrovascular disease, liver disease, malignancy, tuberculosis, hyperlipidaemia, anaemia and connective tissue disease                                                                                                                                                                                                                                                                                                                                     |                                                   |
|                                         |                        | 0                                                                                                                                                                                                                                                                                                                                                                                                                                                                                                                                                | 93.7%                                             |
|                                         |                        | 1                                                                                                                                                                                                                                                                                                                                                                                                                                                                                                                                                | 94.3%                                             |
|                                         |                        | 2                                                                                                                                                                                                                                                                                                                                                                                                                                                                                                                                                | 92.9%                                             |
| Tonelli<br>2015                         | HRs                    | 29 conditions: alcohol misuse, asthma, atrial fibrillation, lymphoma, non-metastatic cancer, metastatic cancer, heart failure, chronic pain, COPD, chronic hepatitis B, cirrhosis, severe constipation, dementia, depression, diabetes, epilepsy, hypertension, hypothyroidism, inflammatory bowel disease, irritable bowel syndrome, multiple sclerosis, myocardial infarction, Parkinson's disease, peptic ulcer disease, peripheral vascular disease, psoriasis, rheumatoid arthritis, schizophrenia, and stroke or transient ischemic attack |                                                   |
|                                         |                        | 0                                                                                                                                                                                                                                                                                                                                                                                                                                                                                                                                                | Ref                                               |
|                                         |                        | 1                                                                                                                                                                                                                                                                                                                                                                                                                                                                                                                                                | 1.57 (1.50-1.63)                                  |
|                                         |                        | 2                                                                                                                                                                                                                                                                                                                                                                                                                                                                                                                                                | 2.34 (2.24-2.44)                                  |
|                                         |                        | 3                                                                                                                                                                                                                                                                                                                                                                                                                                                                                                                                                | 3.43 (3.29-3.58)                                  |
|                                         |                        | 4                                                                                                                                                                                                                                                                                                                                                                                                                                                                                                                                                | 4.81 (4.60-5.02)                                  |
| ≥ 5                                     | 7.74 (7.43-8.07)       |                                                                                                                                                                                                                                                                                                                                                                                                                                                                                                                                                  |                                                   |
| CONTINUOUS PRESENTATION OF EFFECT SIZES |                        |                                                                                                                                                                                                                                                                                                                                                                                                                                                                                                                                                  |                                                   |
| Davies<br>1995                          | HRs                    | @0, 0/8= ; 0' %89% : 0\$8A0# * 8 ; 8) . - (-%<#B)& (0#                                                                                                                                                                                                                                                                                                                                                                                                                                                                                           |                                                   |
|                                         |                        | 11 conditions: ischaemic heart disease, peripheral vascular disease, cerebrovascular disease, left ventricular dysfunction, diabetes mellitus, systemic collagen vascular disease, COPD, pulmonary fibrosis, pulmonary tuberculosis, asthma and cirrhosis                                                                                                                                                                                                                                                                                        |                                                   |
|                                         |                        | Low grade: 0 conditions<br>Intermediate grade: 1-2 conditions<br>High grade: ≥ 3 conditions                                                                                                                                                                                                                                                                                                                                                                                                                                                      |                                                   |
|                                         |                        | Each increase in grade                                                                                                                                                                                                                                                                                                                                                                                                                                                                                                                           | 2.66 (1.55-4.55)                                  |
| Davies<br>2002                          | Relative risk          | \$8A0# * 8 ; 8) . - (-%<#B)& (0#                                                                                                                                                                                                                                                                                                                                                                                                                                                                                                                 |                                                   |
|                                         |                        | Each increase in grade                                                                                                                                                                                                                                                                                                                                                                                                                                                                                                                           | 2.4 (1.4-4.1)                                     |
| Ellam 2008                              | Narrative              | \$8A0# * 8 ; 8) . - (-%<#B)& (0#                                                                                                                                                                                                                                                                                                                                                                                                                                                                                                                 | "No statistically significant effect on survival" |
| Wong<br>2007                            | HRs                    | \$8A0# * 8 ; 8) . - (-%<#B)& (0#                                                                                                                                                                                                                                                                                                                                                                                                                                                                                                                 |                                                   |
|                                         |                        | Each increase in grade                                                                                                                                                                                                                                                                                                                                                                                                                                                                                                                           | 2.53 (1.32-4.83)                                  |
| Lhotta<br>2003                          | HRs                    | Five conditions: diabetes, heart failure, coronary artery disease, cerebrovascular disease and peripheral vascular disease                                                                                                                                                                                                                                                                                                                                                                                                                       |                                                   |
|                                         |                        | Each increase in comorbidity score                                                                                                                                                                                                                                                                                                                                                                                                                                                                                                               | 1.78 (1.32-2.40)                                  |

Results from studies using Condition Count as Multimorbidity Measure. COPD; chronic obstructive pulmonary disease

| Reference#    | Effect size measure# | Multimorbidity measure and groups#                                                                                                                                                                                                                                                                   | Effect size (95% CI)#                                                                                                                                |
|---------------|----------------------|------------------------------------------------------------------------------------------------------------------------------------------------------------------------------------------------------------------------------------------------------------------------------------------------------|------------------------------------------------------------------------------------------------------------------------------------------------------|
| Chandna 1999# | HRs                  | * 8 ; 8) . - ( -% < #10 , 0) - % < #148) 0# C * \$ \$ D#<br>Cardiac score, according to New York Heart Association, respiratory disease score (1-4), cerebrovascular disease score (1-4), peripheral vascular disease score (1-4), cirrhosis (4), and malignancy score (1-4)<br>Each increase in CSS | 1.238 (1.145-1.338)                                                                                                                                  |
| Chandna 2010# | HRs                  | * 8 ; 8) . - ( -% < #10 , 0) - % < #148) 0<br>Low comorbidity (CSS ≤ 4)<br>High comorbidity (CSS > 4)                                                                                                                                                                                                | Ref<br>1.823 (1.255-2.650)                                                                                                                           |
| Pieloch 2015# | HRs                  | E - ( ' 0 < #F) & ' 1 = / & ' % # 7 8) . - ( -% < # + ' ( 03<br>0<br>1<br>2<br>3<br>4<br>5<br>6<br>≥ 7                                                                                                                                                                                               | Ref<br>1.85 (1.45-2.36)<br>3.11 (2.46-3.94)<br>5.00 (3.96-6.31)<br>7.37 (5.83-9.32)<br>9.41 (7.41-11.94)<br>12.15 (9.45-15.63)<br>13.03 (9.68-17.54) |
| Ritchie 2009# | HRs                  | G 0 & ) % # 9 & - / 5) 0 # # * E @ # & ' ( # ( - & . 0 % 01 #<br>Heart failure and CKD<br>Heart failure, CKD and diabetes                                                                                                                                                                            | Ref<br>1.25 (1.07-1.46)                                                                                                                              |

Results from studies using other Multimorbidity Measures

| Reference       | Scores studied                                                  | Presentation of effect size |
|-----------------|-----------------------------------------------------------------|-----------------------------|
| Hemmelgarn 2003 | CCI<br>Development of ESRD modified CCI                         | Kaplan-Meier curves         |
| Di Iorio 2004   | CCI<br>Development of CCI modified for haemodialysis patients   | Relative risk, 5.5 for CCI  |
| van Manen 2002  | CCI<br>Khan index<br>Davies index<br>Development of a new index | Kaplan-Meier curves         |

Studies that analyse different Multimorbidity Measures



Supplementary File 4. Risk of bias: Results from NOS

| Reference               | Selection |    |    |    | Comparability | Outcome assessment |    |    | Quality score |
|-------------------------|-----------|----|----|----|---------------|--------------------|----|----|---------------|
|                         | I#        | J# | K# | L# |               | M#                 | N# | O# |               |
| Beddhu 2000             |           | *  | *  | *  | *             | *                  | *  | *  | 6             |
| Bowling 2016            | *         | *  | *  | *  | *             | *                  | *  | *  | 7             |
| Chae 2010               |           | *  | *  | *  | *             | *                  | *  | *  | 6             |
| Chandna 1999            |           | *  | *  | *  | *             | *                  | *  | *  | 6             |
| Chandna 2010            |           | *  | *  | *  |               | *                  | *  |    | 5             |
| Davies 1995             |           | *  | *  | *  | *             | *                  | *  | *  | 6             |
| Davies 2002             |           | *  | *  | *  | *             | *                  | *  | *  | 6             |
| Di Iorio 2004           |           | *  | *  | *  | *             | *                  | *  | *  | 6             |
| Ellam 2008              |           | *  | *  | *  |               | *                  | *  |    | 5             |
| Fernandez 2019          |           | *  | *  | *  | *             | *                  | *  |    | 6             |
| Fraser 2015             |           | *  | *  | *  | *             | *                  | *  | *  | 6             |
| Fried 2001              |           | *  | *  | *  | *             | *                  | *  | *  | 6             |
| Grosso 2012             |           | *  | *  | *  | *             | *                  | *  | *  | 6             |
| Hemmelgarn 2003         |           | *  | *  | *  | *             | *                  | *  | *  | 7             |
| Lee 2018                | *         | *  | *  | *  | *             | *                  | *  | *  | 7             |
| Lhotta 2003             |           | *  | *  | *  | *             | *                  | *  | *  | 6             |
| Park 2015               |           | *  | *  | *  | *             | *                  | *  | *  | 6             |
| Pieloch 2015            |           | *  | *  | *  | *             | *                  | *  | *  | 6             |
| Rattanasompattikul 2012 |           | *  | *  | *  | *             | *                  | *  | *  | 6             |
| Ritchie 2009            |           | *  | *  | *  | *             | *                  | *  | *  | 6             |
| Shum 2013               |           | *  | *  | *  | *             | *                  | *  | *  | 6             |
| Tonelli 2015            | *         | *  | *  | *  | *             | *                  | *  | *  | 7             |
| van Manen 2002          |           | *  | *  | *  | *             | *                  | *  | *  | 6             |
| Wong 2007               |           | *  | *  | *  | *             | *                  | *  | *  | 6             |
| Wu 2005                 |           | *  | *  | *  | *             | *                  | *  | *  | 6             |
| Wu 2013                 |           | *  | *  | *  | *             | *                  | *  | *  | 6             |

Table 3. Newcastle Ottawa Scale. 1. Representativeness of the exposed cohort. 2. Selection of the non-exposed cohort. 3. Ascertainment of CKD/multimorbidity status. 4. Demonstration that outcomes were not present at start of study. 5. Comparability of cohorts on the basis of the design. 6. Assessment of outcome(s). 7. Was follow-up long enough. 8. Adequacy of follow up of cohort.

# Reporting checklist for meta-analysis of observational studies.

Based on the MOOSE guidelines.

## Instructions to authors

Complete this checklist by entering the page numbers from your manuscript where readers will find each of the items listed below.

Your article may not currently address all the items on the checklist. Please modify your text to include the missing information. If you are certain that an item does not apply, please write "n/a" and provide a short explanation.

Upload your completed checklist as an extra file when you submit to a journal.

In your methods section, say that you used the MOOSE reporting guidelines, and cite them as:

Stroup DF, Berlin JA, Morton SC, Olkin I, Williamson GD, Rennie D, Moher D, Becker BJ, Sipe TA, Thacker SB. Meta-analysis of observational studies in epidemiology: a proposal for reporting. Meta-analysis Of Observational Studies in Epidemiology (MOOSE) group. JAMA. 2000; 283(15):2008-2012.

|                   | Reporting Item                                                                                                                                                                                                                                                                                                                                        | Page Number |
|-------------------|-------------------------------------------------------------------------------------------------------------------------------------------------------------------------------------------------------------------------------------------------------------------------------------------------------------------------------------------------------|-------------|
| <b>Title</b>      |                                                                                                                                                                                                                                                                                                                                                       |             |
|                   | <a href="#">#1</a> Identify the study as a meta-analysis of observational research                                                                                                                                                                                                                                                                    | 1           |
| <b>Abstract</b>   |                                                                                                                                                                                                                                                                                                                                                       |             |
|                   | <a href="#">#2</a> Provide a structured summary including, as applicable: background; objectives; data sources; study eligibility criteria, participants, and interventions; study appraisal and synthesis methods; results; limitations; conclusions and implications of key findings; systematic review registration number (From PRISMA checklist) | 2, 3        |
| <b>Background</b> |                                                                                                                                                                                                                                                                                                                                                       |             |
|                   | <a href="#">#3a</a> Problem definition                                                                                                                                                                                                                                                                                                                | 4           |
|                   | <a href="#">#3b</a> Hypothesis statement                                                                                                                                                                                                                                                                                                              | 4           |
|                   | <a href="#">#3c</a> Description of study outcomes                                                                                                                                                                                                                                                                                                     | 5           |

|    |                     |                                                                                             |      |
|----|---------------------|---------------------------------------------------------------------------------------------|------|
| 1  | <a href="#">#3d</a> | Type of exposure or intervention used                                                       | 5    |
| 2  |                     |                                                                                             |      |
| 3  | <a href="#">#3e</a> | Type of study designs used                                                                  | 5    |
| 4  |                     |                                                                                             |      |
| 5  | <a href="#">#3f</a> | Study population                                                                            | 5    |
| 6  |                     |                                                                                             |      |
| 7  |                     |                                                                                             |      |
| 8  | <b>Methods</b>      |                                                                                             |      |
| 9  |                     |                                                                                             |      |
| 10 | Search              | <a href="#">#4a</a> Qualifications of searchers (eg, librarians and investigators)          | N/A  |
| 11 | strategy            |                                                                                             |      |
| 12 |                     |                                                                                             |      |
| 13 |                     |                                                                                             |      |
| 14 | Search              | <a href="#">#4b</a> Search strategy, including time period included in the synthesis and    | 5    |
| 15 | strategy            | keywords                                                                                    |      |
| 16 |                     |                                                                                             |      |
| 17 |                     |                                                                                             |      |
| 18 | Search              | <a href="#">#4c</a> Effort to include all available studies, including contact with authors | 5, 7 |
| 19 | strategy            |                                                                                             |      |
| 20 |                     |                                                                                             |      |
| 21 |                     |                                                                                             |      |
| 22 | Search              | <a href="#">#4d</a> Databases and registries searched                                       | 5    |
| 23 | strategy            |                                                                                             |      |
| 24 |                     |                                                                                             |      |
| 25 |                     |                                                                                             |      |
| 26 | Search              | <a href="#">#4e</a> Search software used, name and version, including special features used | 5    |
| 27 | strategy            | (eg, explosion)                                                                             |      |
| 28 |                     |                                                                                             |      |
| 29 |                     |                                                                                             |      |
| 30 | Search              | <a href="#">#4f</a> Use of hand searching (eg, reference lists of obtained articles)        | 5    |
| 31 | strategy            |                                                                                             |      |
| 32 |                     |                                                                                             |      |
| 33 |                     |                                                                                             |      |
| 34 | Search              | <a href="#">#4g</a> List of citations located and those excluded, including justification   | 7    |
| 35 | strategy            |                                                                                             |      |
| 36 |                     |                                                                                             |      |
| 37 | Search              | <a href="#">#4h</a> Method of addressing articles published in languages other than English | 5    |
| 38 | strategy            |                                                                                             |      |
| 39 |                     |                                                                                             |      |
| 40 |                     |                                                                                             |      |
| 41 | Search              | <a href="#">#4i</a> Method of handling abstracts and unpublished studies                    | 6    |
| 42 | strategy            |                                                                                             |      |
| 43 |                     |                                                                                             |      |
| 44 |                     |                                                                                             |      |
| 45 | Search              | <a href="#">#4j</a> Description of any contact with authors                                 | 7    |
| 46 | strategy            |                                                                                             |      |
| 47 |                     |                                                                                             |      |
| 48 |                     |                                                                                             |      |
| 49 |                     | <a href="#">#5a</a> Description of relevance or appropriateness of studies gathered for     | 8    |
| 50 |                     | assessing the hypothesis to be tested                                                       |      |
| 51 |                     |                                                                                             |      |
| 52 |                     | <a href="#">#5b</a> Rationale for the selection and coding of data (eg, sound clinical      | 7    |
| 53 |                     | principles or convenience)                                                                  |      |
| 54 |                     |                                                                                             |      |
| 55 |                     |                                                                                             |      |
| 56 |                     | <a href="#">#5c</a> Documentation of how data were classified and coded (eg, multiple       | 7    |
| 57 |                     | raters, blinding, and interrater reliability)                                               |      |
| 58 |                     |                                                                                             |      |
| 59 |                     |                                                                                             |      |
| 60 |                     |                                                                                             |      |

|    |                     |                                                                                                                                                                                                                                                                              |                                     |
|----|---------------------|------------------------------------------------------------------------------------------------------------------------------------------------------------------------------------------------------------------------------------------------------------------------------|-------------------------------------|
| 1  | <a href="#">#5d</a> | Assessment of confounding (eg, comparability of cases and controls in studies where appropriate)                                                                                                                                                                             | 7                                   |
| 2  |                     |                                                                                                                                                                                                                                                                              |                                     |
| 3  |                     |                                                                                                                                                                                                                                                                              |                                     |
| 4  |                     |                                                                                                                                                                                                                                                                              |                                     |
| 5  | <a href="#">#5e</a> | Assessment of study quality, including blinding of quality assessors; stratification or regression on possible predictors of study results                                                                                                                                   | 7                                   |
| 6  |                     |                                                                                                                                                                                                                                                                              |                                     |
| 7  |                     |                                                                                                                                                                                                                                                                              |                                     |
| 8  |                     |                                                                                                                                                                                                                                                                              |                                     |
| 9  | <a href="#">#5f</a> | Assessment of heterogeneity                                                                                                                                                                                                                                                  | 7                                   |
| 10 |                     |                                                                                                                                                                                                                                                                              |                                     |
| 11 | <a href="#">#5g</a> | Description of statistical methods (eg, complete description of fixed or random effects models, justification of whether the chosen models account for predictors of study results, dose-response models, or cumulative meta-analysis) in sufficient detail to be replicated | 7                                   |
| 12 |                     |                                                                                                                                                                                                                                                                              |                                     |
| 13 |                     |                                                                                                                                                                                                                                                                              |                                     |
| 14 |                     |                                                                                                                                                                                                                                                                              |                                     |
| 15 |                     |                                                                                                                                                                                                                                                                              |                                     |
| 16 |                     |                                                                                                                                                                                                                                                                              |                                     |
| 17 |                     |                                                                                                                                                                                                                                                                              |                                     |
| 18 | <a href="#">#5h</a> | Provision of appropriate tables and graphics                                                                                                                                                                                                                                 | 16, 17, 18,<br>supplemental<br>file |
| 19 |                     |                                                                                                                                                                                                                                                                              |                                     |
| 20 |                     |                                                                                                                                                                                                                                                                              |                                     |
| 21 |                     |                                                                                                                                                                                                                                                                              |                                     |
| 22 |                     |                                                                                                                                                                                                                                                                              |                                     |
| 23 | <b>Results</b>      |                                                                                                                                                                                                                                                                              |                                     |
| 24 |                     |                                                                                                                                                                                                                                                                              |                                     |
| 25 | <a href="#">#6a</a> | Graphic summarizing individual study estimates and overall estimate                                                                                                                                                                                                          | N/A                                 |
| 26 |                     |                                                                                                                                                                                                                                                                              |                                     |
| 27 |                     |                                                                                                                                                                                                                                                                              |                                     |
| 28 | <a href="#">#6b</a> | Table giving descriptive information for each study included                                                                                                                                                                                                                 | 16, 17, 18                          |
| 29 |                     |                                                                                                                                                                                                                                                                              |                                     |
| 30 | <a href="#">#6c</a> | Results of sensitivity testing (eg, subgroup analysis)                                                                                                                                                                                                                       | N/A                                 |
| 31 |                     |                                                                                                                                                                                                                                                                              |                                     |
| 32 | <a href="#">#6d</a> | Indication of statistical uncertainty of findings                                                                                                                                                                                                                            | 10                                  |
| 33 |                     |                                                                                                                                                                                                                                                                              |                                     |
| 34 |                     |                                                                                                                                                                                                                                                                              |                                     |
| 35 | <b>Discussion</b>   |                                                                                                                                                                                                                                                                              |                                     |
| 36 |                     |                                                                                                                                                                                                                                                                              |                                     |
| 37 | <a href="#">#7a</a> | Quantitative assessment of bias (eg, publication bias)                                                                                                                                                                                                                       | N/A                                 |
| 38 |                     |                                                                                                                                                                                                                                                                              |                                     |
| 39 | <a href="#">#7b</a> | Justification for exclusion (eg, exclusion of non-English-language citations)                                                                                                                                                                                                | N/A                                 |
| 40 |                     |                                                                                                                                                                                                                                                                              |                                     |
| 41 |                     |                                                                                                                                                                                                                                                                              |                                     |
| 42 |                     |                                                                                                                                                                                                                                                                              |                                     |
| 43 | <a href="#">#7c</a> | Assessment of quality of included studies                                                                                                                                                                                                                                    | 11                                  |
| 44 |                     |                                                                                                                                                                                                                                                                              |                                     |
| 45 |                     |                                                                                                                                                                                                                                                                              |                                     |
| 46 | <b>Conclusion</b>   |                                                                                                                                                                                                                                                                              |                                     |
| 47 |                     |                                                                                                                                                                                                                                                                              |                                     |
| 48 | <a href="#">#8a</a> | Consideration of alternative explanations for observed results                                                                                                                                                                                                               | N/A                                 |
| 49 |                     |                                                                                                                                                                                                                                                                              |                                     |
| 50 | <a href="#">#8b</a> | Generalization of the conclusions (ie, appropriate for the data presented and within the domain of the literature review)                                                                                                                                                    | 12                                  |
| 51 |                     |                                                                                                                                                                                                                                                                              |                                     |
| 52 |                     |                                                                                                                                                                                                                                                                              |                                     |
| 53 |                     |                                                                                                                                                                                                                                                                              |                                     |
| 54 | <a href="#">#8c</a> | Guidelines for future research                                                                                                                                                                                                                                               | 12                                  |
| 55 |                     |                                                                                                                                                                                                                                                                              |                                     |
| 56 | <a href="#">#8d</a> | Disclosure of funding source                                                                                                                                                                                                                                                 | 15                                  |
| 57 |                     |                                                                                                                                                                                                                                                                              |                                     |
| 58 |                     |                                                                                                                                                                                                                                                                              |                                     |

Notes:

For peer review only - <http://bmjopen.bmj.com/site/about/guidelines.xhtml>

- 1 • 5h: 16, 17, 18, supplemental file Reproduced with permission from JAMA. 2000. 283(15):2008-2012.  
2 Copyright © 2000 American Medical Association. All rights reserved. This checklist was completed on 09.  
3 March 2020 using <https://www.goodreports.org/>, a tool made by the [EQUATOR Network](#) in collaboration  
4 with [Penelope.ai](#)  
5  
6  
7  
8  
9  
10  
11  
12  
13  
14  
15  
16  
17  
18  
19  
20  
21  
22  
23  
24  
25  
26  
27  
28  
29  
30  
31  
32  
33  
34  
35  
36  
37  
38  
39  
40  
41  
42  
43  
44  
45  
46  
47  
48  
49  
50  
51  
52  
53  
54  
55  
56  
57  
58  
59  
60

For peer review only

# BMJ Open

## Associations between multimorbidity and adverse clinical outcomes in patients with chronic kidney disease: a systematic review and meta-analysis

|                                 |                                                                                                                                                                                                                                                                                                                                                                                                                                                                                                              |
|---------------------------------|--------------------------------------------------------------------------------------------------------------------------------------------------------------------------------------------------------------------------------------------------------------------------------------------------------------------------------------------------------------------------------------------------------------------------------------------------------------------------------------------------------------|
| Journal:                        | <i>BMJ Open</i>                                                                                                                                                                                                                                                                                                                                                                                                                                                                                              |
| Manuscript ID                   | bmjopen-2020-038401.R1                                                                                                                                                                                                                                                                                                                                                                                                                                                                                       |
| Article Type:                   | Original research                                                                                                                                                                                                                                                                                                                                                                                                                                                                                            |
| Date Submitted by the Author:   | 21-Apr-2020                                                                                                                                                                                                                                                                                                                                                                                                                                                                                                  |
| Complete List of Authors:       | Sullivan, Michael; University of Glasgow, Institute of Cardiovascular and Medical Sciences<br>Rankin, Alastair; University of Glasgow, Institute of Cardiovascular and Medical Sciences<br>Jani, Bhautesh; University of Glasgow, General Practice and Primary Care, Institute of Health and Wellbeing<br>Mair, Frances; University of Glasgow, General Practice and Primary Care, Institute of Health and Wellbeing<br>Mark, Patrick; University of Glasgow, Institute of Cardiovascular & Medical Sciences |
| <b>Primary Subject Heading</b>: | Renal medicine                                                                                                                                                                                                                                                                                                                                                                                                                                                                                               |
| Secondary Subject Heading:      | Epidemiology, General practice / Family practice                                                                                                                                                                                                                                                                                                                                                                                                                                                             |
| Keywords:                       | Chronic renal failure < NEPHROLOGY, Dialysis < NEPHROLOGY, Diabetic nephropathy & vascular disease < DIABETES & ENDOCRINOLOGY, Ischaemic heart disease < CARDIOLOGY, End stage renal failure < NEPHROLOGY                                                                                                                                                                                                                                                                                                    |
|                                 |                                                                                                                                                                                                                                                                                                                                                                                                                                                                                                              |

SCHOLARONE™  
Manuscripts



I, the Submitting Author has the right to grant and does grant on behalf of all authors of the Work (as defined in the below author licence), an exclusive licence and/or a non-exclusive licence for contributions from authors who are: i) UK Crown employees; ii) where BMJ has agreed a CC-BY licence shall apply, and/or iii) in accordance with the terms applicable for US Federal Government officers or employees acting as part of their official duties; on a worldwide, perpetual, irrevocable, royalty-free basis to BMJ Publishing Group Ltd ("BMJ") its licensees and where the relevant Journal is co-owned by BMJ to the co-owners of the Journal, to publish the Work in this journal and any other BMJ products and to exploit all rights, as set out in our [licence](#).

The Submitting Author accepts and understands that any supply made under these terms is made by BMJ to the Submitting Author unless you are acting as an employee on behalf of your employer or a postgraduate student of an affiliated institution which is paying any applicable article publishing charge ("APC") for Open Access articles. Where the Submitting Author wishes to make the Work available on an Open Access basis (and intends to pay the relevant APC), the terms of reuse of such Open Access shall be governed by a Creative Commons licence – details of these licences and which [Creative Commons](#) licence will apply to this Work are set out in our licence referred to above.

Other than as permitted in any relevant BMJ Author's Self Archiving Policies, I confirm this Work has not been accepted for publication elsewhere, is not being considered for publication elsewhere and does not duplicate material already published. I confirm all authors consent to publication of this Work and authorise the granting of this licence.

1  
2 **Associations between multimorbidity and adverse clinical outcomes in patients**  
3  
4 **with chronic kidney disease: a systematic review and meta-analysis**  
5  
6

7 Michael Sullivan<sup>1</sup>, Alastair Rankin<sup>1</sup>, Bhautesh Dinesh Jani<sup>2</sup>, Frances S Mair<sup>2</sup>, Patrick B  
8  
9 Mark<sup>1</sup>  
10  
11  
12

13  
14 1 – Institute of Cardiovascular and Medical Sciences, University of Glasgow, Glasgow, UK  
15

16 2 – General Practice and Primary Care, Institute of Health and Wellbeing, University of  
17  
18 Glasgow, Glasgow, UK  
19  
20  
21  
22

23 **Corresponding author:**  
24

25 Michael Sullivan  
26

27 Address: Institute of Cardiovascular and Medical Sciences, University of Glasgow, 126  
28

29 University Place, Glasgow, G12 8TA, UK  
30  
31

32 Telephone: +44(0) 141 330 2677  
33

34 Email: [Michael.sullivan@glasgow.ac.uk](mailto:Michael.sullivan@glasgow.ac.uk)  
35

36  
37 Twitter Handle: @sullivanmk8  
38  
39  
40

41 **Keywords:** chronic kidney disease, dialysis, comorbid, multimorbidity, diabetes,  
42  
43 cardiovascular  
44  
45  
46  
47  
48  
49  
50  
51  
52  
53  
54  
55  
56  
57  
58  
59  
60



## Abstract

*Objective:* To systematically review the literature exploring the associations between multimorbidity (the presence of two or more long term conditions (LTCs)) and adverse clinical outcomes in patients with chronic kidney disease (CKD).

*Design:* Systematic Review and Meta-analysis.

*Data sources:* MEDLINE, EMBASE, CINAHL, Cochrane Library and SCOPUS (1946-2019).

The main search terms were “Chronic Kidney Failure” and “Multimorbid\*”.

*Eligibility Criteria:* Observational studies of adults over the age of 18 with CKD stages three to five i.e. eGFR less than 60ml/minute/1.73m<sup>2</sup>. The exposure was Multimorbidity quantified by Measures and the outcomes were all-cause mortality, renal progression, hospitalisation and cardiovascular events. We did not consider CKD as a co-morbid LTC.

*Data Extraction and Synthesis:* Newcastle Ottawa Scale for quality appraisal and risk of bias assessment and fixed-effects meta-analysis for data synthesis.

*Results:* Of 1852 papers identified, 26 met the inclusion criteria. 21 papers involved patients with advanced CKD and no studies were from low or middle income countries. All-cause mortality was an outcome in all studies. Patients with multimorbidity were at higher risk of mortality compared to patients without multimorbidity (Total risk ratio 2.28 (95% confidence interval 1.81-2.88)). The risk of mortality was higher with increasing multimorbidity (Total hazard ratio 1.31 (1.27-1.36)) and both concordant and discordant LTCs were associated with heightened risk. Multimorbidity was associated with renal progression in four studies, hospitalisation in five studies and cardiovascular events in two studies.

*Limitations:* Meta-analysis could only include 10 of 26 papers as the methodologies of studies were heterogeneous.

*Conclusions:* There are associations between multimorbidity and adverse clinical outcomes in patients with CKD. However, most data relate to mortality risk in patients with advanced CKD. There is limited evidence regarding patients with mild to moderate CKD, outcomes

1  
2 such as cardiovascular events, types of LTCs and regarding patients from low or middle  
3  
4 income countries.  
5

6 *Prospero Registration:* CRD42019147424.  
7  
8  
9

## 10 **Article Summary**

### 11 **Strengths and limitations of this study**

- 12  
13  
14  
15  
16 • This review is the first to synthesise the existing evidence on multimorbidity in patients  
17 with CKD and it included a range of settings.
- 18  
19  
20 • The outcomes of interest were chosen by researchers and these do not include all  
21 outcomes that are important to patients e.g. quality of life.
- 22  
23  
24 • Two authors independently performed paper selection, data extraction and quality  
25 appraisal.
- 26  
27  
28 • Meta-analysis was performed, but only included selected papers because of  
29 methodological heterogeneity of papers.  
30  
31  
32  
33  
34  
35  
36  
37  
38  
39  
40  
41  
42  
43  
44  
45  
46  
47  
48  
49  
50  
51  
52  
53  
54  
55  
56  
57  
58  
59  
60

## Introduction

Multimorbidity is the presence of two or more long-term conditions (LTCs)<sup>1</sup>. In a Scottish study of 1.8 million patients, it was found to affect 23% of the whole population and in particular those from areas of lower socioeconomic status<sup>2</sup>. It is a problem for individual patients because it is associated with complex treatment regimens that result in a high burden of treatment and reduced quality of life<sup>3</sup>. For clinicians and health services, caring for these individuals represents a huge workload and equates to approximately two thirds of health care spending<sup>4</sup>. The current disease-orientated approaches of guidelines and healthcare are inadequate for patients with multiple LTCs and complex needs<sup>5</sup>.

Multimorbidity is more common in patients with chronic kidney disease (CKD) than any other LTC: e.g. among 2.5 million Canadians, patients with CKD had more co-morbid LTCs than patients with lung disease (mean 4.2 LTCs versus 2.8)<sup>6</sup>. The prevalence of CKD is around 12%<sup>7</sup> and as this rises globally, the adverse effects of CKD and multimorbidity on quality of life are increasing<sup>8</sup>. The leading cause of death in patients with CKD is cardiovascular disease and although this is partly related to risk factors common to both conditions, low estimated glomerular filtration rate (eGFR) and proteinuria are predictors of cardiovascular mortality<sup>9, 10</sup>. The higher cardiovascular risk observed among CKD patients is independent of traditional atherosclerotic risk factors such as hypertension and dyslipidaemia, but the reasons for this and the influence of multimorbidity on CKD are incompletely understood. CKD and multimorbidity therefore occur together frequently and there are a number of issues common to both problems such as polypharmacy and significant treatment burden<sup>11</sup>.

We undertook this systematic review to establish the current evidence concerning associations between multimorbidity and adverse clinical outcomes in patients with CKD.

## Materials and Methods

The Preferred Reporting Items for Systematic Reviews and Meta-Analyses Protocols (PRISMA-P) guidelines were followed<sup>12</sup> and this review was registered with the International Prospective Register of Systematic Reviews (CRD42019147424).

### *Literature Search*

A comprehensive search strategy identified studies of patients with CKD that investigated the associations between multimorbidity and adverse clinical outcomes (see Supplementary File 1 for search terms). We included observational studies; in particular those using electronic health care records. There was no restriction on sample size. The databases searched included studies from 1946 to 2019. The search was limited to papers published in English. Databases searched were MEDLINE (OVID interface), EMBASE (OVID interface), CINAHL Complete (EBSCO interface), The Cochrane Library (OVID interface), and SCOPUS. Selected medical subject headings were combined with keywords relating to multimorbidity and CKD to create a search strategy which was produced for use in MEDLINE and amended for use in the other databases, using controlled vocabulary, Boolean operators and search symbols. The search was carried out to include literature published up to 29<sup>th</sup> August 2019. The results were supplemented with searches of reference lists of included studies. Search data were stored and merged using Endnote X9 (Clarivate Analytics, Philadelphia, USA) and papers were shared and assessed using DistillerSR (Evidence Partners, Ottawa, Canada).

### *Inclusion Criteria*

We included empirical quantitative studies that contained data on associations between Multimorbidity Measures and all-cause mortality or additional outcomes in adults with CKD. We accepted any Multimorbidity Measure, which included simple counts of LTCs and co-morbidity scoring systems. We did not consider CKD as a co-morbid LTC because all of the patients in our papers had CKD. Additional outcomes were hospitalisation, cardiovascular

1  
2 events, cardiovascular deaths, heart failure hospitalisations and renal progression (40%  
3  
4 reduction in eGFR, doubling of serum creatinine or initiation of renal replacement therapy  
5  
6 (RRT)). Studies that analysed the relationship between a Multimorbidity Measure and any  
7  
8 of our outcomes of interest were included in adults over the age of 18 with CKD stages three  
9  
10 to five i.e. eGFR less than 60ml/minute/1.73m<sup>2</sup> including those requiring RRT i.e.  
11  
12 haemodialysis (HD), peritoneal dialysis (PD) or renal transplantation.  
13  
14

### 15 16 *Exclusion Criteria*

17  
18 Review articles, drug intervention studies, qualitative studies, case reports and conference  
19  
20 abstracts were excluded. Studies with children or adolescents aged 18 or under, animals  
21  
22 and individuals without CKD were excluded.  
23  
24

25  
26 The study selection process was conducted by two reviewers (MS, AR). Title screening was  
27  
28 followed by abstract and full paper review, where necessary. Any inter-reviewer  
29  
30 disagreements were resolved by a third reviewer (PM).  
31  
32

### 33 34 *Data extraction*

35  
36 As recommended by the Cochrane Handbook<sup>13</sup>, data were extracted in a Population,  
37  
38 Exposure, Comparator, Outcomes (PECO) approach:  
39  
40

41 Population: We extracted data on the characteristics of study populations: country, sample  
42  
43 size, follow-up time and setting i.e. CKD, HD, PD, renal transplant and conservative care.  
44  
45

46 Exposure: We extracted the Multimorbidity Measure used in each study and whether LTCs  
47  
48 were categorised into different types for analysis.  
49  
50

51 Comparator: We extracted the details provided of comparator groups i.e. patients with CKD  
52  
53 with less than two LTCs. We did not count CKD as an LTC.  
54  
55  
56  
57  
58  
59  
60

1  
2 Outcomes: We extracted details of the statistical analyses employed to evaluate the  
3  
4 relationship between Multimorbidity Measure and outcomes. Risks were expressed as effect  
5  
6 sizes with 95% confidence intervals, where available.  
7

### 8 9 *Data synthesis and analysis*

10  
11 Results were presented in a narrative format. Where possible, fixed effects meta-analysis  
12  
13 was performed for the primary outcome, all-cause mortality. Fixed effects models were  
14  
15 applied because we assumed the direction of effect of multimorbidity on mortality would be  
16  
17 consistent across the studies and heterogeneity would not contribute to the effect estimates.  
18  
19 The Generic Inverse Variance method was used where multimorbidity was expressed as a  
20  
21 continuous variable and the Mantel-Haenszel method was used where multimorbidity was  
22  
23 expressed as a categorical variable. Quantification of statistical heterogeneity was assessed  
24  
25 by means of  $I^2$ , which shows the percentage of total variation across studies due to  
26  
27 heterogeneity<sup>13</sup>. These analyses were carried out using RevMan Version 5.3 (The Cochrane  
28  
29 Collaboration, Copenhagen, Denmark). Meta-analysis was limited by heterogeneous  
30  
31 methodologies: variable Multimorbidity Measures, use of effect sizes (Hazard ratios (HRs),  
32  
33 Risk ratios (RRs), Kaplan Meier curves) and the use of multimorbidity as a continuous and  
34  
35 categorical variable. We therefore performed meta-analysis where several studies used  
36  
37 similar methodologies. Data on numbers of deceased patients were not available for all  
38  
39 studies and so we contacted study authors for their primary data. For meta-analysis and  
40  
41 where necessary and possible, we calculated RRs for studies, comparing patients with  
42  
43 multimorbidity to those without multimorbidity. HRs could not be calculated as there were  
44  
45 no individual time-to-event data.  
46  
47  
48  
49  
50  
51

### 52 53 *Quality appraisal*

54  
55 Two researchers conducted quality appraisal independently (MS, AR). Studies were  
56  
57 assessed using an adapted Newcastle-Ottawa quality assessment scale (NOS), as  
58  
59  
60

1 informed by the Cochrane Handbook<sup>13</sup> (see Supplementary File 2). Studies were not  
2 excluded based on quality appraisal.  
3  
4  
5

## 6 **Patient and public involvement**

7 No patients involved.  
8

## 9 **Results**

### 10 *Search results*

11 Figure 1 demonstrates the literature search flow. After the removal of duplicate papers, 1852  
12 papers were identified. 1756 papers were excluded as they were not relevant and so 96 full  
13 papers were screened and 26 papers met our eligibility criteria and were included in the  
14 review<sup>14-39</sup>.  
15

### 16 *Study characteristics*

17 Table 1 lists the characteristics of the 26 included studies. The studies were published  
18 between 1995 and 2019 and all used a cohort design. The size of populations was between  
19 69 and 821,334. Fourteen studies examined subjects predominantly on dialysis<sup>14, 16-21, 24, 26,</sup>  
20 <sup>29, 32, 34, 32, 39</sup>; five included patients with CKD stages 3 to 5<sup>15, 23, 23, 33, 35</sup> including two with  
21 mild CKD <sup>23, 33</sup>; two involved patients with CKD stage 5 including those not on RRT or  
22 conservative care<sup>28, 30</sup>; two included those receiving conservative care<sup>22, 37</sup>; three included  
23 renal transplant recipients<sup>25, 31, 38</sup>.  
24

25 Table 2 shows the number of studies using each Multimorbidity Measure and how the  
26 corresponding effect sizes were presented: as a categorical or a continuous variable. In  
27 addition to these, three studies examined more than one Multimorbidity Measure: comparing  
28 how effectively each measure predicted outcomes<sup>21, 26, 36</sup>. Ten studies used the Charlson  
29 Comorbidity Index (CCI) or a modification of this scale (mCCI)<sup>14, 16, 24, 25, 29, 30, 32, 34, 38, 39</sup>.  
30 Seven studies used the number of LTCs i.e. condition count<sup>15, 22, 23, 27, 28, 35, 37</sup>. Two studies  
31 used the Stoke comorbidity grade, which uses condition count to divide patients into low,  
32 intermediate and high grades<sup>19, 20</sup>. Two studies used the Comorbidity severity score<sup>17, 18</sup>.  
33  
34  
35  
36  
37  
38  
39  
40  
41  
42  
43  
44  
45  
46  
47  
48  
49  
50  
51  
52  
53  
54  
55  
56  
57  
58  
59  
60

1  
2 One study compared those with CKD, diabetes and heart failure to those with just CKD and  
3 heart failure<sup>33</sup>. One study used the Kidney Transplant Morbidity Index<sup>31</sup>.

4  
5  
6 All studies reported the effect of multimorbidity on all-cause mortality. Five studies reported  
7 the effect of multimorbidity on hospitalisation<sup>14, 18, 33-35</sup> and four on renal progression<sup>25, 27, 31,</sup>  
8  
9  
10  
11  
12  
13  
14  
15  
16  
17  
18  
19  
20  
21  
22  
23  
24  
25  
26  
27  
28  
29  
30  
31  
32  
33  
34  
35  
36  
37  
38  
39  
40  
41  
42  
43  
44  
45  
46  
47  
48  
49  
50  
51  
52  
53  
54  
55  
56  
57  
58  
59  
60  
38. One study reported the effect of multimorbidity on heart failure hospitalisation and  
cardiovascular death<sup>33</sup> and one study reported the effect of multimorbidity on myocardial  
infarction<sup>35</sup>. Twelve studies expressed effect sizes using multimorbidity as a categorical  
variable<sup>15-17, 23, 25, 27, 31-33, 35, 38, 39</sup>, nine as a continuous variable<sup>14, 18-20, 24, 28, 29, 34, 37</sup> and one  
as both<sup>30</sup>. One study gave a narrative comparison of groups<sup>22</sup> and two used Kaplan-Meier  
curves<sup>26, 36</sup>. Two studies categorised LTCs into types: both used concordant and discordant  
as types and one also specified mental health and chronic pain LTCs<sup>15, 35</sup>.

### 27 28 *Main findings*

29  
30  
31  
32  
33  
34  
35  
36  
37  
38  
39  
40  
41  
42  
43  
44  
45  
46  
47  
48  
49  
50  
51  
52  
53  
54  
55  
56  
57  
58  
59  
60  
The results of the included studies were summarised in Supplementary File 3. Some papers  
did not provide adjusted HRs. To make it easier to compare the studies, we therefore quoted  
unadjusted HRs. Where multimorbidity was used as a categorical variable, 12 of 13 studies  
found that patients with multimorbidity had higher rates of mortality than patients without  
multimorbidity. In the one study that did not detect a difference, Lee *et al*'s primary outcome  
was renal progression<sup>27</sup>. For all-cause mortality, the authors provided event rates and  
Kaplan Meier Curves but there were no HRs with adjustments for confounding variables.

Where multimorbidity was used as a continuous variable, 10 of 11 studies found that with  
each increase in Multimorbidity Measure, all-cause mortality was higher. In the one study to  
not detect a difference, Ellam *et al* was a study of just 69 conservatively-managed patients<sup>22</sup>.

Of the four studies that reported renal progression, three were in renal transplant  
recipients<sup>25, 30, 31</sup>. All four studies demonstrated higher rates of renal progression in patients  
with multimorbidity (HRs from each study 2.97 (1.53-5.76), 2.44 (1.19-5.02), 3.11 (2.55-  
3.80), 1.42 (1.02-1.97). Renal progression was defined by graft loss or RRT initiation and



1  
2 one paper reported significant annual reductions in eGFR by increasing number of LTCs<sup>27</sup>.  
3  
4 Five studies reported rates of hospitalisation and all of these identified an association  
5  
6 between multimorbidity and hospitalisation<sup>14, 18, 33-35</sup>.  
7

8  
9 One paper reported rates of Heart Failure Hospitalisation and Cardiovascular Death<sup>33</sup>:  
10  
11 patients with multimorbidity had higher rates of both outcomes than patients without  
12  
13 multimorbidity. One paper reported higher rates of Myocardial Infarction in patients with  
14  
15 multimorbidity<sup>35</sup>.  
16

17  
18 Two papers described the influence of concordant and discordant LTCs on adverse  
19  
20 outcomes<sup>15, 35</sup>. These papers found that both types of LTC were associated with higher rates  
21  
22 of mortality. One paper found that the rates of outcomes were higher in patients with at least  
23  
24 one discordant LTC compared to patients with only concordant LTCs<sup>15</sup>. No association was  
25  
26 identified between mental health and chronic pain LTCs and Myocardial Infarction<sup>35</sup>.  
27  
28  
29  
30

### 31 32 *Meta-analysis*

33  
34 Data synthesis was problematic because each study reported different effect sizes for  
35  
36 different categorical groups. We therefore performed meta-analysis for all-cause mortality  
37  
38 where several studies used comparable methodologies. Figure 2 included studies that used  
39  
40 CCI as a continuous variable, demonstrating that with each increase in CCI, the risk of  
41  
42 mortality was higher (Total HR 1.31 (95% confidence interval 1.27-1.36)). Figure 3 included  
43  
44 studies that used condition count as a categorical variable: demonstrating that patients with  
45  
46 multimorbidity were at higher risk of mortality compared to patients without multimorbidity  
47  
48 (Total RR 2.28 (95% confidence interval 1.81-2.88)). Risk ratio were used here because  
49  
50 time to event data were not available for all these studies and so hazard ratios could not be  
51  
52 calculated. There was considerable statistical heterogeneity in the studies included in each  
53  
54 meta-analysis ( $I^2$  97% in figure 2 and 78% in figure 3). Sub-group analyses were not possible  
55  
56 such as for patients with mild-moderate CKD because there were inadequate studies.  
57  
58  
59  
60

## *Risk of bias*

All studies selected patients with and without multimorbidity from the same cohort and used either secure medical records or structured interviews to collect data. Most studies included just one group of patients with CKD such as patients receiving HD and only three studies included patients with a true range of mild to severe CKD<sup>15, 27, 35</sup>. All but two studies controlled for factors such as ischaemic heart disease, age or diabetes<sup>17, 22</sup>. Only one study made a statement about subjects who were lost to follow-up<sup>26</sup>. However, as all the studies were based on health care databases, it is reasonable to assume complete or near-complete follow-up. All studies followed up patients for more than one year, but there was variation in the average length of follow-up (from 13.1 to 81.6 months). Four studies did not specify the average follow-up time but from their survival analyses, it was clear that patients were followed up for at least one year<sup>25, 30, 36, 39</sup>.

The NOS score evaluation of each study was between five and seven stars (See Supplementary File 4). The two studies that did not control for confounding factors were “poor” quality as per Agency for Healthcare Research and Quality standards<sup>17, 22, 40</sup>. The remainder were “good” quality<sup>14-16, 18-21, 23-39</sup>.

## **Discussion**

To the best of our knowledge, this is the first systematic review and meta-analysis to synthesise the existing evidence on the associations between multimorbidity and outcomes specific to patients with CKD. It is increasingly recognised that multimorbidity and the management of patients with disease clusters are challenging problems<sup>41</sup>. The medical profession has been given a mandate to improve the care of patients affected by multimorbidity and to do so, improving our understanding of the issues will be fundamental. Multimorbidity has been studied in the general population, with clear associations reported between it and high rates of mortality<sup>42</sup>. It is time for researchers to build a body of evidence about patients with kidney disease. Our review demonstrates that for patients with CKD,

1  
2 multimorbidity is associated with high rates of mortality, and the risk is higher with increasing  
3  
4 numbers of LTCs. Unfortunately, the literature provides little detail beyond this association.  
5  
6 Of the papers in the review, only two categorised LTCs and studied whether the type of  
7  
8 LTCs influenced outcomes. Tonelli *et al* and Bowling *et al* found that concordant LTCs such  
9  
10 as diabetes were associated with high rates of mortality, but so were discordant or unrelated  
11  
12 LTCs like cancer and depression<sup>15, 35</sup>. Bowling *et al* found that the presence of one or more  
13  
14 discordant LTC conferred higher risk compared to patients with only concordant LTCs. This  
15  
16 suggests that there are groups of patients in whom it is not just the number but also the type  
17  
18 of LTCs that puts them at elevated risk. Further research is needed into what patterns or  
19  
20 clusters of disease exist to help clinicians understand the risks faced by patients with CKD  
21  
22 and multimorbidity.  
23  
24  
25  
26

27  
28 Patients require clinicians to help with their overall health and quality of life, not just the  
29  
30 status of individual LTCs. As seen in the Standardized Outcomes in  
31  
32 Nephrology–Hemodialysis (SONG-HD) initiative, patients usually wish to understand the  
33  
34 risks they face. However, there is often a mismatch between the outcomes regarded as  
35  
36 important by patients to those emphasised in clinical guidelines<sup>43, 44</sup>. It is therefore  
37  
38 imperative that we consider patient-oriented outcomes when studying multimorbidity and  
39  
40 ensure that research leads to improvements in care for patients. A limitation of our review is  
41  
42 that we did not summarise outcomes prioritised by patients. The merit in investigating  
43  
44 multimorbidity in patients with CKD will be that patients and clinicians will have an improved  
45  
46 understanding of the risks they face. They will therefore be able to prioritise particular  
47  
48 interventions such as cardiovascular risk factor modification and vascular access creation.  
49  
50  
51

52  
53 Despite the methodological and clinical heterogeneity of the studies in our review, the  
54  
55 findings are consistent with existing literature<sup>11</sup>. We have confirmed associations between  
56  
57 multimorbidity and adverse clinical outcomes in RRT and non-RRT settings, and in a range  
58  
59 of countries. 21 of 26 studies included patients with advanced CKD including those on RRT.  
60

1  
2 However, it should be noted that there was no information available from low or middle  
3  
4 income countries. Mild to moderate CKD was also under-represented, despite this  
5  
6 constituting 99% of the patients with CKD<sup>45</sup>. Multimorbidity in patients with CKD from low  
7  
8 and middle income countries and in those with mild to moderate CKD should therefore be  
9  
10 targets for future research. Only two studies assessed the influence of multimorbidity on  
11  
12 cardiovascular outcomes<sup>33, 35</sup>. Cardiovascular morbidity and mortality is the most significant  
13  
14 risk for patients with CKD and many of the LTCs that occur in patients with CKD are risk  
15  
16 factors for cardiovascular events<sup>10</sup>. Further research is therefore needed to explore how  
17  
18 multimorbidity influences cardiovascular events in patients with CKD. Of the four studies  
19  
20 that examined the influence of multimorbidity on renal progression, all but one were in  
21  
22 patients with renal transplants. The study in non-transplant patients identified an association  
23  
24 between multimorbidity and renal progression<sup>27</sup>. This risk is a significant one, particularly for  
25  
26 the patients who develop the need for RRT. Many patient cohorts around the world have  
27  
28 ample follow-up data and so the influence of multimorbidity on renal progression in non-  
29  
30 transplant cohorts should be studied in greater detail.  
31  
32  
33  
34  
35

36  
37 The studies included in our review are heterogenous. Clinical heterogeneity is evident in the  
38  
39 range of populations studied: stage 3 CKD, HD, PD, transplant and conservative care. There  
40  
41 are high levels of methodological and statistical heterogeneity. There is no consensus as to  
42  
43 which Multimorbidity Measure should be used, and which measure is the most effective at  
44  
45 predicting adverse outcomes<sup>46</sup>. CCI was the most commonly used measure, although a  
46  
47 number of modifications have been made for use in populations with CKD. Three studies  
48  
49 included in this review compared different Multimorbidity Measures. CCI was found to  
50  
51 effectively predict mortality risk, with other scoring systems performing comparably and  
52  
53 none superior to the rest. Although our work demonstrates that various Multimorbidity  
54  
55 Measures are associated with adverse clinical outcomes, we have not identified the best  
56  
57 Multimorbidity Measure for risk prediction.  
58  
59  
60

1  
2 It has been recognised that there are fewer randomised controlled trials (RCTs) to assess  
3  
4 the efficacy of interventions in patients with CKD than in other medical specialties and that  
5  
6 patients with CKD are often excluded from RCTs<sup>47, 48</sup>. Furthermore, patients with advanced  
7  
8 CKD that are included in RCTs are not representative of the wider population of those with  
9  
10 CKD<sup>49</sup>. Similar observations have been made in other fields, whereby subjects with  
11  
12 multimorbidity are underrepresented in trials of novel interventions<sup>50</sup>. Therefore, to improve  
13  
14 outcomes for patients with CKD, both epidemiological studies and RCTs need to account  
15  
16 for the range of multimorbidity in patients with CKD. A strength of our review is that it brings  
17  
18 together information about the effects of multimorbidity in patients with CKD from various  
19  
20 settings to create a comprehensive picture of the effects on different outcomes. Although  
21  
22 the studies are challenging to summarise given the heterogeneity, the data are ample and  
23  
24 clinically acceptable and therefore likely to be correct. Meta-analysis was performed with  
25  
26 data from only 10 studies. The data from 16 studies, including those with large sample sizes,  
27  
28 therefore did not contribute to full data analysis. If a uniform Multimorbidity Measure were  
29  
30 agreed and established in guidelines, the comparability and synthesis of data in future would  
31  
32 be improved. The evaluation of the effects of types of LTCs on outcomes was limited  
33  
34 because only two studies examined this issue. A key focus of research should therefore be  
35  
36 what patterns of multimorbidity or disease clusters exist in groups of patients with CKD.  
37  
38  
39  
40  
41  
42  
43

44 In conclusion, this review provides evidence of associations between multimorbidity and  
45  
46 heightened risk of adverse clinical outcomes in patients with CKD. Our findings emphasise  
47  
48 the need for further research into the details of how multimorbidity influences different  
49  
50 outcomes. In particular, evidence gaps exist for patients with mild to moderate CKD, for  
51  
52 outcomes other than mortality such as renal progression and cardiovascular events, for  
53  
54 patients with CKD from low and middle income countries and for the patterns of  
55  
56 multimorbidity that contribute to heightened risk.  
57  
58  
59  
60

## Acknowledgements

We thank Paul Cannon of the University of Glasgow Library for assistance with the literature search.

## Funding

This research received no specific grant from any funding agency in the public, commercial or not-for-profit sectors

## Conflicts of Interest

The results presented in this paper have not been published previously in whole or part.

Michael Sullivan, Alastair Rankin, Bhautesh Dinesh Jani and Frances S. Mair have no conflicts of interest. Patrick B. Mark reports personal fees and non-financial support from Vifor, personal fees from Astrazeneca, grants from Boehringer Ingelheim, personal fees and non-financial support from Pharmacosmos, personal fees from Janssen, personal fees from Novartis, personal fees from Pfizer, personal fees from Bristol Myers Squibb, personal fees and non-financial support from Napp, outside the submitted work.

## Author Contributions

Michael Sullivan, Alastair Rankin, Bhautesh Dinesh Jani, Frances S. Mair and Patrick B. Mark contributed to conceptualisation, appraisal of results, writing (review and editing) and manuscript approval. Michael Sullivan, Alastair Rankin and Patrick B. Mark performed data analysis. Michael Sullivan and Alastair Rankin performed data extraction. Michael Sullivan prepared the original manuscript draft.

## Word Count

3739 words.

## Figure Legends

Figure 1. PRISMA flow diagram

Figure 2. Mortality risk for each increase in Charlson Comorbidity Index (Generic Inverse Variance Method, Fixed Effects Model)

Figure 3. Mortality risk for patients with multimorbidity (Mantel-Haenszel Method, Fixed Effects Model)

## Data availability statement

All relevant data are included in the article or uploaded as supplementary information.

## Tables

| Reference                      | Country     | Setting | Sample size | Average follow-up (months) | Outcome(s) |                   |
|--------------------------------|-------------|---------|-------------|----------------------------|------------|-------------------|
|                                |             |         |             |                            | Mortality  | Others            |
| <b>DIALYSIS</b>                |             |         |             |                            |            |                   |
| <b>Beddhu 2000</b>             | USA         | HD/PD   | 268         | 13.1                       | ✓          | Hospitalisation   |
| <b>Chae 2010</b>               | South Korea | HD      | 456         | 40.6                       | ✓          |                   |
| <b>Chandna 1999</b>            | UK          | HD/PD   | 292         | 63                         | ✓          | Hospitalisation   |
| <b>Chandna 2010</b>            | UK          | CC/RRT  | 844         | 58.7*                      | ✓          |                   |
| <b>Davies 1995</b>             | UK          | PD      | 97          | 30                         | ✓          |                   |
| <b>Davies 2002</b>             | UK          | PD      | 303         | 72.0*                      | ✓          |                   |
| <b>Di Iorio 2004</b>           | Italy       | HD      | 515         | 15                         | ✓          |                   |
| <b>Fried 2001</b>              | USA         | PD      | 268         | 16.9                       | ✓          |                   |
| <b>Hemmelgarn 2003</b>         | Canada      | HD/PD   | 237         | 26.3                       | ✓          |                   |
| <b>Park 2015</b>               | South Korea | HD      | 24738       | 47.7                       | ✓          |                   |
| <b>Rattanasompattikul 2012</b> | USA         | HD      | 893         | 72                         | ✓          |                   |
| <b>Shum 2013</b>               | China       | PD/CC   | 157         | 23.5                       | ✓          | Hospitalisation   |
| <b>van Manen 2002</b>          | Netherlands | HD/PD   | 589         | NK                         | ✓          |                   |
| <b>Wu 2013</b>                 | Taiwan      | HD/PD   | 79645       | NK                         | ✓          |                   |
| <b>NON-RRT CKD</b>             |             |         |             |                            |            |                   |
| <b>Bowling 2016</b>            | USA         | CKD 3-5 | 821334      | 81.6                       | ✓          |                   |
| <b>Fraser 2015</b>             | UK          | CKD 3   | 1741        | 43.2                       | ✓          |                   |
| <b>Lee 2018</b>                | Taiwan      | CKD 3-5 | 1463        | 76.7                       | ✓          | Renal progression |

|                          |         |                   |        |       |   |                                               |
|--------------------------|---------|-------------------|--------|-------|---|-----------------------------------------------|
| <b>Lhotta 2003</b>       | Austria | CKD 5             | 75     | 48    | ✓ |                                               |
| <b>Ritchie 2009</b>      | USA     | CKD/Heart failure | 1974   | 32.6  | ✓ | Hospitalisation, HF hospitalisation, CV death |
| <b>Tonelli 2015</b>      | Canada  | CKD 3-5           | 530771 | 48    | ✓ | Hospitalisation, Myocardial Infarction        |
| <b>TRANSPLANT</b>        |         |                   |        |       |   |                                               |
| <b>Fernandez 2019</b>    | USA     | Tx assessment     | 2086   | NK    | ✓ |                                               |
| <b>Grosso 2012</b>       | Italy   | Tx recipients     | 223    | NK    | ✓ | Renal Progression                             |
| <b>Pieloch 2015</b>      | USA     | Tx recipients     | 100261 | 36    | ✓ | Renal Progression                             |
| <b>Wu 2005</b>           | USA     | Tx recipients     | 715    | 40.2  | ✓ | Renal Progression                             |
| <b>CONSERVATIVE CARE</b> |         |                   |        |       |   |                                               |
| <b>Ellam 2008</b>        | UK      | CC                | 69     | 21*   | ✓ |                                               |
| <b>Wong 2007</b>         | UK      | CC                | 73     | 23.4* | ✓ |                                               |

Table 1. Study characteristics. HD, haemodialysis; PD, peritoneal dialysis; CKD, chronic kidney disease; RRT, renal replacement therapy; CC, conservative care; Tx, transplant; NK, Not Known. \*Median survival

| Variable Type | Multimorbidity Measure: number of studies |                 |     |      |                                                              |
|---------------|-------------------------------------------|-----------------|-----|------|--------------------------------------------------------------|
|               | CCI                                       | Condition Count | CSS | KTMI | Heart failure and CKD versus Heart failure, CKD and diabetes |
| Categorical   | 6                                         | 4               | 1   | 1    | 1                                                            |
| Continuous    | 6                                         | 4               | 1   | 0    | 0                                                            |

Table 2. Studies using each Multimorbidity measure. CCI, Charlson Comorbidity Index; CSS, Comorbidity Severity Score; KTMI, Kidney Transplant Morbidity Index.



## References

- 1 Multimorbidity: clinical assessment and management: National Institute for Health and Care Excellence (NICE); 2017. 23 p.
- 2 Barnett, K., S. W. Mercer, M. Norbury, et al. (2012). "Epidemiology of multimorbidity and implications for health care, research, and medical education: a cross-sectional study." *The Lancet* **380**(9836): 37-43.
- 3 Harris, M. F., S. Dennis and M. Pillay (2013). "Multimorbidity: negotiating priorities and making progress." *Aust Fam Physician* **42**(12): 850-854.
- 4 Tinetti, M. E., T. R. Fried and C. M. Boyd (2012). "Designing health care for the most common chronic condition--multimorbidity." *Jama* **307**(23): 2493-2494.
- 5 Mair, F. S. and C. R. May (2014). "Thinking about the burden of treatment." *Bmj* **349**: g6680.
- 6 Tonelli, M., N. Wiebe, B. J. Manns, et al. (2018). "Comparison of the Complexity of Patients Seen by Different Medical Subspecialists in a Universal Health Care System." *JAMA Netw Open* **1**(7): e184852.
- 7 Coresh, J. (2017). "Update on the Burden of CKD." **28**(4): 1020-1022, *ibid*.
- 8 Kassebaum, N. J., M. Arora, R. M. Barber, et al. (2016). "Global, regional, and national disability-adjusted life-years (DALYs) for 315 diseases and injuries and healthy life expectancy (HALE), 1990-2015: a systematic analysis for the Global Burden of Disease Study 2015." *The Lancet* **388**(10053): 1603-1658.
- 9 van der Velde, M., K. Matsushita, J. Coresh, et al. (2011). "Lower estimated glomerular filtration rate and higher albuminuria are associated with all-cause and cardiovascular mortality. A collaborative meta-analysis of high-risk population cohorts." *Kidney Int* **79**(12): 1341-1352.
- 10 Matsushita, K., J. Coresh, Y. Sang, et al. (2015). "Estimated glomerular filtration rate and albuminuria for prediction of cardiovascular outcomes: a collaborative meta-analysis of individual participant data." *Lancet Diabetes Endocrinol* **3**(7): 514-525.
- 11 Fraser, S. D. and M. W. Taal (2016). "Multimorbidity in people with chronic kidney disease: implications for outcomes and treatment." *Curr Opin Nephrol Hypertens* **25**(6): 465-472.
- 12 Shamseer, L., D. Moher, M. Clarke, et al. (2015). "Preferred reporting items for systematic review and meta-analysis protocols (PRISMA-P) 2015: elaboration and explanation." **349**: g7647.
- 13 Cumpston, M., T. Li, M. J. Page, et al. (2019). "Updated guidance for trusted systematic reviews: a new edition of the Cochrane Handbook for Systematic Reviews of Interventions." *Cochrane Database Syst Rev* **10**: Ed000142.
- 14 Beddhu, S., F. J. Bruns, M. Saul, P. Seddon and M. L. Zeidel (2000). "A simple comorbidity scale predicts clinical outcomes and costs in dialysis patients." *Am J Med* **108**(8): 609-613.
- 15 Bowling, C. B., L. Plantinga, L. S. Phillips, et al. (2017). "Association of Multimorbidity with Mortality and Healthcare Utilization in Chronic Kidney Disease." *J Am Geriatr Soc* **65**(4): 704-711.
- 16 Chae, J. W., C. S. Song, H. Kim, et al. (2011). "Prediction of mortality in patients undergoing maintenance hemodialysis by Charlson Comorbidity Index using ICD-10 database." *Nephron Clin Pract* **117**(4): c379-384.
- 17 Chandna, S. M., M. Da Silva-Gane, C. Marshall, et al. (2011). "Survival of elderly patients with stage 5 CKD: comparison of conservative management and renal replacement therapy." *Nephrol Dial Transplant* **26**(5): 1608-1614.

- 1  
2
- 
- 3 18 Chandna, S. M., J. Schulz, C. Lawrence, R. N. Greenwood and K. Farrington (1999). "Is  
4 there a rationale for rationing chronic dialysis? A hospital based cohort study of factors  
5 affecting survival and morbidity." *Bmj* **318**(7178): 217-223.
- 6 19 Davies, S. J., L. Phillips, P. F. Naish and G. I. Russell (2002). "Quantifying comorbidity  
7 in peritoneal dialysis patients and its relationship to other predictors of survival." *Nephrol*  
8 *Dial Transplant* **17**(6): 1085-1092.
- 9 20 Davies, S. J., L. Russell, J. Bryan, L. Phillips and G. I. Russell (1995). "Comorbidity,  
10 urea kinetics, and appetite in continuous ambulatory peritoneal dialysis patients: their  
11 interrelationship and prediction of survival." *Am J Kidney Dis* **26**(2): 353-361.
- 12 21 Di Iorio, B., N. Cillo, M. Cirillo and N. G. De Santo (2004). "Charlson Comorbidity Index  
13 is a predictor of outcomes in incident hemodialysis patients and correlates with phase  
14 angle and hospitalization." *Int J Artif Organs* **27**(4): 330-336.
- 15 22 Ellam, T., M. El-Kossi, K. C. Prasanth, M. El-Nahas and A. Khwaja (2009).  
16 "Conservatively managed patients with stage 5 chronic kidney disease--outcomes from a  
17 single center experience." *Qjm* **102**(8): 547-554.
- 18 23 Fraser, S. D., P. J. Roderick, C. R. May, et al. (2015). "The burden of comorbidity in  
19 people with chronic kidney disease stage 3: a cohort study." *BMC Nephrol* **16**: 193.
- 20 24 Fried, L., J. Bernardini and B. Piraino (2001). "Charlson comorbidity index as a predictor  
21 of outcomes in incident peritoneal dialysis patients." *Am J Kidney Dis* **37**(2): 337-342.
- 22 25 Grosso, G., D. Corona, A. Mistretta, et al. (2012). "Predictive value of the Charlson  
23 comorbidity index in kidney transplantation." *Transplant Proc* **44**(7): 1859-1863.
- 24 26 Hemmelgarn, B. R., B. J. Manns, H. Quan and W. A. Ghali (2003). "Adapting the  
25 Charlson Comorbidity Index for use in patients with ESRD." *Am J Kidney Dis* **42**(1): 125-  
26 132.
- 27 27 Lee, W. C., Y. T. Lee, L. C. Li, et al. (2018). "The Number of Comorbidities Predicts  
28 Renal Outcomes in Patients with Stage 3(-)5 Chronic Kidney Disease." *J Clin Med* **7**(12).
- 29 28 Lhotta, K., M. Zobl, G. Mayer and F. Kronenberg (2003). "Late referral defined by renal  
30 function: association with morbidity and mortality." *J Nephrol* **16**(6): 855-861.
- 31 29 Park, J. Y., M. H. Kim, S. S. Han, et al. (2015). "Recalibration and validation of the  
32 Charlson comorbidity index in Korean incident hemodialysis patients." *PLoS One* **10**(5):  
33 e0127240.
- 34 30 Perez Fernandez, M., P. Martinez Miguel, H. Ying, et al. (2019). "Comorbidity, Frailty,  
35 and Waitlist Mortality among Kidney Transplant Candidates of All Ages." *Am J Nephrol*  
36 **49**(2): 103-110.
- 37 31 Pieloch, D., V. Dombrovskiy, A. J. Osband, et al. (2015). "The Kidney Transplant  
38 Morbidity Index (KTMI): a simple prognostic tool to help determine outcome risk in kidney  
39 transplant candidates." *Prog Transplant* **25**(1): 70-76.
- 40 32 Rattanasompattikul, M., U. Feroze, M. Z. Molnar, et al. (2012). "Charlson comorbidity  
41 score is a strong predictor of mortality in hemodialysis patients." *Int Urol Nephrol* **44**(6):  
42 1813-1823.
- 43 33 Ritchie, C., O. J. Ekundayo, M. Muchimba, et al. (2009). "Effects of diabetes mellitus in  
44 patients with heart failure and chronic kidney disease: a propensity-matched study of  
45 multimorbidity in chronic heart failure." *Int J Cardiol* **134**(3): 330-335.
- 46 34 Shum, C. K., K. F. Tam, W. L. Chak, et al. (2014). "Outcomes in older adults with stage  
47 5 chronic kidney disease: comparison of peritoneal dialysis and conservative  
48 management." *J Gerontol A Biol Sci Med Sci* **69**(3): 308-314.
- 49 35 Tonelli, M., N. Wiebe, B. Guthrie, et al. (2015). "Comorbidity as a driver of adverse  
50 outcomes in people with chronic kidney disease." *Kidney Int* **88**(4): 859-866.
- 51 36 van Manen, J. G., J. C. Korevaar, F. W. Dekker, et al. (2002). "How to adjust for  
52 comorbidity in survival studies in ESRD patients: a comparison of different indices." *Am J*  
53 *Kidney Dis* **40**(1): 82-89.
- 54  
55  
56  
57  
58  
59  
60

- 1  
2  
3  
4  
5  
6  
7  
8  
9  
10  
11  
12  
13  
14  
15  
16  
17  
18  
19  
20  
21  
22  
23  
24  
25  
26  
27  
28  
29  
30  
31  
32  
33  
34  
35  
36  
37  
38  
39  
40  
41  
42  
43  
44  
45  
46  
47  
48  
49  
50  
51  
52  
53  
54  
55  
56  
57  
58  
59  
60
- <sup>37</sup> Wong, C. F., M. McCarthy, M. L. Howse and P. S. Williams (2007). "Factors affecting survival in advanced chronic kidney disease patients who choose not to receive dialysis." *Ren Fail* **29**(6): 653-659.
- <sup>38</sup> Wu, C., I. Evans, R. Joseph, et al. (2005). "Comorbid conditions in kidney transplantation: association with graft and patient survival." *J Am Soc Nephrol* **16**(11): 3437-3444.
- <sup>39</sup> Wu, P. H., Y. T. Lin, T. C. Lee, et al. (2013). "Predicting mortality of incident dialysis patients in Taiwan--a longitudinal population-based study." *PLoS One* **8**(4): e61930.
- <sup>40</sup> AHRQ Customer Service Standards. October 2018. Agency for Healthcare Research and Quality, Rockville, MD. <https://www.ahrq.gov/contact/standards.html>
- <sup>41</sup> Whitty, C. J. M., C. MacEwen, A. Goddard, et al. (2020). "Rising to the challenge of multimorbidity." *BMJ* **368**: l6964.
- <sup>42</sup> Jani, B. D., P. Hanlon, B. I. Nicholl, et al. (2019). "Relationship between multimorbidity, demographic factors and mortality: findings from the UK Biobank cohort." *BMC Medicine* **17**(1): 74.
- <sup>43</sup> Evangelidis, N., A. Tong, B. Manns, et al. (2017). "Developing a Set of Core Outcomes for Trials in Hemodialysis: An International Delphi Survey." *Am J Kidney Dis* **70**(4): 464-475.
- <sup>44</sup> Tong, A., B. Manns, B. Hemmelgarn, et al. (2017). "Establishing Core Outcome Domains in Hemodialysis: Report of the Standardized Outcomes in Nephrology–Hemodialysis (SONG-HD) Consensus Workshop." *Am J Kidney Dis*. **69**(1): 97–107.
- <sup>45</sup> Coresh, J., E. Selvin, L. A. Stevens, et al. (2007). "Prevalence of chronic kidney disease in the United States." *Jama* **298**(17): 2038-2047.
- <sup>46</sup> Stirland, L. E., L. González-Saavedra, D. S. Mullin, et al. (2020). "Measuring multimorbidity beyond counting diseases: systematic review of community and population studies and guide to index choice." *368*: m160.
- <sup>47</sup> Konstantinidis, I., G. N. Nadkarni, R. Yacoub, et al. (2016). "Representation of Patients With Kidney Disease in Trials of Cardiovascular Interventions: An Updated Systematic Review." *JAMA Intern Med* **176**(1): 121-124.
- <sup>48</sup> Smyth, B., A. Haber, K. Trongtrakul, et al. (2019). "Representativeness of Randomized Clinical Trial Cohorts in End-stage Kidney Disease: A Meta-analysis." *Ibid*.
- <sup>49</sup> Strippoli, G. F., J. C. Craig and F. P. Schena (2004). "The number, quality, and coverage of randomized controlled trials in nephrology." *J Am Soc Nephrol* **15**(2): 411-419.
- <sup>50</sup> Hanlon, P., L. Hannigan, J. Rodriguez-Perez, et al. (2019). "Representation of people with comorbidity and multimorbidity in clinical trials of novel drug therapies: an individual-level participant data analysis." *BMC Medicine* **17**(1): 201.



PRISMA flow diagram

1  
2  
3  
4  
5  
6  
7  
8  
9  
10  
11  
12  
13  
14  
15  
16  
17  
18  
19  
20  
21  
22  
23  
24  
25  
26  
27  
28  
29  
30  
31  
32  
33  
34  
35  
36  
37  
38  
39  
40  
41  
42  
43  
44  
45  
46  
47  
48  
49  
50  
51  
52  
53  
54  
55  
56  
57  
58  
59  
60



Mortality risk for Charlson Comorbidity Index as a continuous variable (Generic Inverse Variance Method, Fixed Effects Model)



Mortality risk for patients with multimorbidity (Mantel-Haenszel Method, Fixed Effects Model)

## Supplementary File 1. Database Search Terms

|                  |                                                                                                                                                                                                                                                                                                                                                                                                                       |                                                                                                                                                                                                                                                                                                                                                     |                               |
|------------------|-----------------------------------------------------------------------------------------------------------------------------------------------------------------------------------------------------------------------------------------------------------------------------------------------------------------------------------------------------------------------------------------------------------------------|-----------------------------------------------------------------------------------------------------------------------------------------------------------------------------------------------------------------------------------------------------------------------------------------------------------------------------------------------------|-------------------------------|
| Subject headings | Chronic Kidney Failure<br>Kidney Failure<br>Chronic Renal Insufficiency<br>Renal Insufficiency<br>Kidney Disease<br>Kidney Dysfunction<br>Mild renal impairment<br>Moderate renal impairment<br>Severe renal impairment<br>Subclinical renal impairment<br>Renal replacement therapy<br>Hemodialysis<br>Peritoneal Dialysis<br>Continuous Ambulatory<br>Peritoneal Dialysis<br>Kidney transplantation<br>Kidney graft | Multimorbidity<br>Multiple Chronic Conditions                                                                                                                                                                                                                                                                                                       | Humans<br>Adult               |
| Textwords        | Chronic kidney or chronic renal<br>CKF, CKD, CRF or CRD<br>Predialysis or pre-dialysis<br>Renal failure or kidney failure<br>Kidney disease<br>Renal insufficiency*<br>Hemodialysis or Haemodialysis<br>Hemodiafiltration or<br>haemodiafiltration<br>Dialysis<br>Endstage renal or endstage<br>kidney<br>Peritoneal dialysis<br>CAPD or APD or CCPD or PD<br>Kidney Transplant                                       | Multimorbid* or multi morbid<br>Condition count<br>Multiple condition or multicondition<br>or multi condition<br>Multiple disease or multidisease or<br>multi disease<br>Multiple disorder or multidisorder or<br>multi disorder<br>Multiple comorbidities or multiple co<br>morbidities<br>Discordant comorbidities or<br>concordant comorbidities | Adult* or aged* or<br>elderly |

## Supplementary File 2. NEWCASTLE - OTTAWA QUALITY ASSESSMENT SCALE

Note: A study can be awarded a maximum of one star for each numbered item within the Selection and Outcome categories. A maximum of two stars can be given for Comparability

### Selection

- 1) Representativeness of the exposed cohort ie chronic kidney disease (CKD) with multimorbidity (MM)
  - a) truly representative of the average CKD/MM population in the community \*
  - b) somewhat representative of the average CKD/MM population in the community \*
  - c) selected group of users eg only one disease group
  - d) no description of the derivation of the cohort
- 2) Selection of the unexposed cohort ie CKD without MM
  - a) drawn from the same community as the exposed cohort \*
  - b) drawn from a different source
  - c) no description of the derivation of the non exposed cohort
  - d) no control group
- 3) Ascertainment of CKD/MM status
  - a) secure record (eg medical records) \*
  - b) structured interview \*
  - c) written self report
  - d) no description
- 4) Demonstration that outcomes were not present at start of study
  - a) yes \*
  - b) no

### Comparability

- 1) Comparability of cohorts on the basis of the design ie are exposed/non-exposed individuals matched or do the authors actively control for confounding factors?
  - a) study controls for ischaemic heart disease \*
  - b) study controls for additional factor(s) \*

Statements of no differences between groups or that differences were not statistically significant are not sufficient for establishing comparability.

### Outcomes

- 1) Assessment of outcome(s)
  - a) independent blind assessment \*
  - b) record linkage \*
  - c) self report
  - d) no description
- 2) Was follow-up long enough ie > 1 year
  - a) yes \*
  - b) no
- 3) Adequacy of follow up of cohorts
  - a) complete follow up - all subjects accounted for \*
  - b) subjects lost to follow up unlikely to introduce bias - small number lost to follow up, or description provided of those lost) \*
  - c) high lost to follow up rate and no description of those lost
  - d) no statement

Total stars /8



## Supplementary File 3. Results from included studies

| Reference                               | Effect size      | CCI groups                                                                                                                        | Effect size (95% Confidence Interval) |
|-----------------------------------------|------------------|-----------------------------------------------------------------------------------------------------------------------------------|---------------------------------------|
| CATEGORICAL PRESENTATION OF EFFECT SIZE |                  |                                                                                                                                   |                                       |
| Chae 2010                               | HRs              | <b>A. Standard CCI variables</b>                                                                                                  |                                       |
|                                         |                  | Quartile 1 (CCI 2)                                                                                                                | Ref                                   |
|                                         |                  | Quartile 2 (CCI 4-5)                                                                                                              | 9.22 (3.29-25.84)                     |
|                                         |                  | Quartile 3 (CCI 6)                                                                                                                | 16.77 (5.97-47.11)                    |
|                                         |                  | Quartile 4 (CCI 7-11)                                                                                                             | 22.37 (8.08-61.93)                    |
|                                         |                  | <b>B. CCI excluding age and diabetes</b>                                                                                          |                                       |
|                                         |                  | Tertile 1 (CCI 2)                                                                                                                 | Ref                                   |
|                                         |                  | Tertile 2 (CCI 3)                                                                                                                 | 1.39 (1.01-2.05)                      |
| Tertile 3 (CCI 4-8)                     | 1.98 (1.25-3.14) |                                                                                                                                   |                                       |
| Wu 2005                                 | HRs              | <b>CCI excluding age</b>                                                                                                          |                                       |
|                                         |                  | CCI < 5                                                                                                                           | Ref                                   |
|                                         |                  | CCI ≥ 5                                                                                                                           | 2.88 (1.90-4.37)                      |
| Grosso 2012                             | HRs              | <b>Modified CCI</b>                                                                                                               |                                       |
|                                         |                  | 1 point: myocardial infarction, heart failure, peripheral vascular disease, COPD, connective tissue disease or mild liver disease |                                       |
|                                         |                  | 2 points: diabetes mellitus, cerebrovascular accident, solid tumour or leukaemia                                                  |                                       |
|                                         |                  | CCI ≤ 1                                                                                                                           | Ref                                   |
|                                         |                  | CCI > 1                                                                                                                           | 3.87 (1.06-14.06)                     |
| Rattanasompattikul 2012                 | HRs              | <b>CCI excluding age and renal disease</b>                                                                                        |                                       |
|                                         |                  | Quartile 1 (CCI 0)                                                                                                                | Ref                                   |
|                                         |                  | Quartile 2 (CCI 1-2)                                                                                                              | 1.72 (1.26-2.36)                      |
|                                         |                  | Quartile 3 (CCI 3)                                                                                                                | 2.60 (1.13-3.26)                      |
|                                         |                  | Quartile 4 (CCI 4-9)                                                                                                              | 3.40 (2.41-4.79)                      |
| Wu 2013                                 | HRs              | <b>CCI excluding age</b>                                                                                                          |                                       |
|                                         |                  | CCI ≤ 3                                                                                                                           | Ref                                   |
|                                         |                  | CCI 4-6                                                                                                                           | 2.49 (2.35-2.63)                      |
|                                         |                  | CCI 7-9                                                                                                                           | 3.53 (3.34-3.73)                      |
|                                         |                  | CCI 10-12                                                                                                                         | 3.66 (3.45-3.88)                      |
|                                         |                  | CCI 13-15                                                                                                                         | 4.12 (3.84-4.42)                      |
|                                         |                  | CCI > 15                                                                                                                          | 4.42 (4.02-4.86)                      |

CONTINUOUS PRESENTATION OF EFFECT SIZES

|    |                                                         |               |                                                                                                                                                                                                                                                                                                                                                                                                                                                                       |                  |
|----|---------------------------------------------------------|---------------|-----------------------------------------------------------------------------------------------------------------------------------------------------------------------------------------------------------------------------------------------------------------------------------------------------------------------------------------------------------------------------------------------------------------------------------------------------------------------|------------------|
| 1  | Beddhu 2000                                             | HRs           | <b>Modified CCI</b><br>1 point: coronary artery disease, heart failure, peripheral vascular disease, cerebrovascular disease, dementia, chronic pulmonary disease, connective tissue disorder, peptic ulcer disease, mild liver disease, diabetes<br>2 points: hemiplegia, moderate or severe renal disease, diabetes with end-organ damage, any tumour, leukaemia, lymphoma<br>3 points: moderate or severe liver disease<br>6 points: metastatic solid tumour, AIDS |                  |
| 2  |                                                         |               | Each increase in CCI                                                                                                                                                                                                                                                                                                                                                                                                                                                  | 1.24 (1.11-1.39) |
| 3  | Fried 2001                                              | Relative risk | <b>Standard CCI variables</b>                                                                                                                                                                                                                                                                                                                                                                                                                                         |                  |
| 4  |                                                         |               | Each increase in CCI                                                                                                                                                                                                                                                                                                                                                                                                                                                  | 1.54 (1.36-1.74) |
| 5  | Park 2015                                               | HRs           | <b>A. Standard CCI variables</b>                                                                                                                                                                                                                                                                                                                                                                                                                                      |                  |
| 6  |                                                         |               | Each increase in CCI                                                                                                                                                                                                                                                                                                                                                                                                                                                  | 1.42 (1.39-1.45) |
| 7  |                                                         |               | <b>B. Modified CCI in incident haemodialysis patients</b><br>Details not provided                                                                                                                                                                                                                                                                                                                                                                                     |                  |
| 8  |                                                         |               | Each increase in CCI                                                                                                                                                                                                                                                                                                                                                                                                                                                  | 1.72 (1.66-1.78) |
| 9  | Shum 2013                                               | HRs           | <b>ESRD Modified CCI</b>                                                                                                                                                                                                                                                                                                                                                                                                                                              |                  |
| 10 |                                                         |               | Each increase in CCI (PD group only)                                                                                                                                                                                                                                                                                                                                                                                                                                  | 1.36 (1.18-1.56) |
| 11 | CONTINUOUS AND CATEGORICAL PRESENTATION OF EFFECT SIZES |               |                                                                                                                                                                                                                                                                                                                                                                                                                                                                       |                  |
| 12 | Fernandez 2019                                          | HRs           | <b>ESRD Modified CCI</b>                                                                                                                                                                                                                                                                                                                                                                                                                                              |                  |
| 13 |                                                         |               | Each increase in CCI                                                                                                                                                                                                                                                                                                                                                                                                                                                  | 1.08 (1.03-1.13) |
| 14 |                                                         |               | Low comorbidity burden CCI 0-1                                                                                                                                                                                                                                                                                                                                                                                                                                        | Ref              |
| 15 |                                                         |               | High comorbidity burden CCI ≥ 2                                                                                                                                                                                                                                                                                                                                                                                                                                       | 1.38 (1.01-1.89) |

Results from studies using Charlson Comorbidity Index (CCI) as Multimorbidity Measure. HR; hazard ratio. COPD; Chronic Obstructive Pulmonary Disease. AIDS; Acquired Immune Deficiency Syndrome. PD; peritoneal dialysis.

| Reference                               | Effect size | Conditions and groups                                                                                                                                                                                                                                                                                                                                                                                             | Effect size (95% Confidence Interval) |
|-----------------------------------------|-------------|-------------------------------------------------------------------------------------------------------------------------------------------------------------------------------------------------------------------------------------------------------------------------------------------------------------------------------------------------------------------------------------------------------------------|---------------------------------------|
| CATEGORICAL PRESENTATION OF EFFECT SIZE |             |                                                                                                                                                                                                                                                                                                                                                                                                                   |                                       |
| Bowling 2016                            | HRs         | 22 conditions: hypertension, hyperlipidemia, coronary heart disease, atrial fibrillation, heart failure, peripheral arterial disease, arthritis, osteoporosis, gout, diabetes, hypothyroidism, cancer, prostate cancer, anaemia, cerebrovascular disease, depression, dementia, epilepsy, Parkinson's disease, gastroesophageal reflux disease/peptic ulcer disease, benign prostatic hypertrophy and COPD/asthma |                                       |
|                                         |             | 1                                                                                                                                                                                                                                                                                                                                                                                                                 | Ref                                   |
|                                         |             | 2                                                                                                                                                                                                                                                                                                                                                                                                                 | 0.95 (0.93-0.97)                      |
|                                         |             | 3                                                                                                                                                                                                                                                                                                                                                                                                                 | 1.03 (1.01-1.05)                      |
|                                         |             | 4                                                                                                                                                                                                                                                                                                                                                                                                                 | 1.24 (1.21-1.26)                      |
|                                         |             | 5                                                                                                                                                                                                                                                                                                                                                                                                                 | 1.43 (1.39-1.47)                      |
|                                         |             | ≥ 6                                                                                                                                                                                                                                                                                                                                                                                                               | 1.72 (1.64-1.80)                      |

|                                                |                        |                                                                                                                                                                                                                                                                                                                                                                                                                                                                                                                                                  |                                                   |
|------------------------------------------------|------------------------|--------------------------------------------------------------------------------------------------------------------------------------------------------------------------------------------------------------------------------------------------------------------------------------------------------------------------------------------------------------------------------------------------------------------------------------------------------------------------------------------------------------------------------------------------|---------------------------------------------------|
| Fraser<br>2015                                 | HRs                    | 11 conditions: hypertension, diabetes, ischaemic heart disease, heart failure, peripheral vascular disease, cerebrovascular disease, chronic respiratory disorder, depression, chronic painful condition, thyroid disorder and anaemia                                                                                                                                                                                                                                                                                                           |                                                   |
|                                                |                        | 0-1                                                                                                                                                                                                                                                                                                                                                                                                                                                                                                                                              | Ref                                               |
|                                                |                        | 2                                                                                                                                                                                                                                                                                                                                                                                                                                                                                                                                                | 2.31 (1.36-3.94)                                  |
|                                                |                        | ≥ 3                                                                                                                                                                                                                                                                                                                                                                                                                                                                                                                                              | 4.58 (2.85-7.38)                                  |
| Lee 2018                                       | 10-year survival rates | 12 conditions: diabetes, hypertension, gout, heart failure, ischemic heart disease, cerebrovascular disease, liver disease, malignancy, tuberculosis, hyperlipidaemia, anaemia and connective tissue disease                                                                                                                                                                                                                                                                                                                                     |                                                   |
|                                                |                        | 0                                                                                                                                                                                                                                                                                                                                                                                                                                                                                                                                                | 93.7%                                             |
|                                                |                        | 1                                                                                                                                                                                                                                                                                                                                                                                                                                                                                                                                                | 94.3%                                             |
|                                                |                        | 2                                                                                                                                                                                                                                                                                                                                                                                                                                                                                                                                                | 92.9%                                             |
| Tonelli<br>2015                                | HRs                    | 29 conditions: alcohol misuse, asthma, atrial fibrillation, lymphoma, non-metastatic cancer, metastatic cancer, heart failure, chronic pain, COPD, chronic hepatitis B, cirrhosis, severe constipation, dementia, depression, diabetes, epilepsy, hypertension, hypothyroidism, inflammatory bowel disease, irritable bowel syndrome, multiple sclerosis, myocardial infarction, Parkinson's disease, peptic ulcer disease, peripheral vascular disease, psoriasis, rheumatoid arthritis, schizophrenia, and stroke or transient ischemic attack |                                                   |
|                                                |                        | 0                                                                                                                                                                                                                                                                                                                                                                                                                                                                                                                                                | Ref                                               |
|                                                |                        | 1                                                                                                                                                                                                                                                                                                                                                                                                                                                                                                                                                | 1.57 (1.50-1.63)                                  |
|                                                |                        | 2                                                                                                                                                                                                                                                                                                                                                                                                                                                                                                                                                | 2.34 (2.24-2.44)                                  |
|                                                |                        | 3                                                                                                                                                                                                                                                                                                                                                                                                                                                                                                                                                | 3.43 (3.29-3.58)                                  |
|                                                |                        | 4                                                                                                                                                                                                                                                                                                                                                                                                                                                                                                                                                | 4.81 (4.60-5.02)                                  |
| ≥ 5                                            | 7.74 (7.43-8.07)       |                                                                                                                                                                                                                                                                                                                                                                                                                                                                                                                                                  |                                                   |
| <b>CONTINUOUS PRESENTATION OF EFFECT SIZES</b> |                        |                                                                                                                                                                                                                                                                                                                                                                                                                                                                                                                                                  |                                                   |
| Davies<br>1995                                 | HRs                    | <b>Development of the Stoke Comorbidity Grade</b>                                                                                                                                                                                                                                                                                                                                                                                                                                                                                                |                                                   |
|                                                |                        | 11 conditions: ischaemic heart disease, peripheral vascular disease, cerebrovascular disease, left ventricular dysfunction, diabetes mellitus, systemic collagen vascular disease, COPD, pulmonary fibrosis, pulmonary tuberculosis, asthma and cirrhosis                                                                                                                                                                                                                                                                                        |                                                   |
|                                                |                        | Low grade: 0 conditions<br>Intermediate grade: 1-2 conditions<br>High grade: ≥ 3 conditions                                                                                                                                                                                                                                                                                                                                                                                                                                                      |                                                   |
|                                                |                        | Each increase in grade                                                                                                                                                                                                                                                                                                                                                                                                                                                                                                                           | 2.66 (1.55-4.55)                                  |
| Davies<br>2002                                 | Relative risk          | <b>Stoke Comorbidity Grade</b>                                                                                                                                                                                                                                                                                                                                                                                                                                                                                                                   |                                                   |
|                                                |                        | Each increase in grade                                                                                                                                                                                                                                                                                                                                                                                                                                                                                                                           | 2.4 (1.4-4.1)                                     |
| Ellam 2008                                     | Narrative              | <b>Stoke Comorbidity Grade</b>                                                                                                                                                                                                                                                                                                                                                                                                                                                                                                                   | "No statistically significant effect on survival" |
| Wong<br>2007                                   | HRs                    | <b>Stoke Comorbidity Grade</b>                                                                                                                                                                                                                                                                                                                                                                                                                                                                                                                   |                                                   |
|                                                |                        | Each increase in grade                                                                                                                                                                                                                                                                                                                                                                                                                                                                                                                           | 2.53 (1.32-4.83)                                  |
| Lhotta<br>2003                                 | HRs                    | Five conditions: diabetes, heart failure, coronary artery disease, cerebrovascular disease and peripheral vascular disease                                                                                                                                                                                                                                                                                                                                                                                                                       |                                                   |
|                                                |                        | Each increase in comorbidity score                                                                                                                                                                                                                                                                                                                                                                                                                                                                                                               | 1.78 (1.32-2.40)                                  |

Results from studies using Condition Count as Multimorbidity Measure. COPD; chronic obstructive pulmonary disease. HR; hazard ratio.

| Reference    | Effect size measure | Multimorbidity measure and groups                                                                                                                                                                                                                                                   | Effect size (95% Confidence Interval)                                                                                                                |
|--------------|---------------------|-------------------------------------------------------------------------------------------------------------------------------------------------------------------------------------------------------------------------------------------------------------------------------------|------------------------------------------------------------------------------------------------------------------------------------------------------|
| Chandna 1999 | HRs                 | <b>Comorbidity severity score (CSS)</b><br>Cardiac score, according to New York Heart Association, respiratory disease score (1-4), cerebrovascular disease score (1-4), peripheral vascular disease score (1-4), cirrhosis (4), and malignancy score (1-4)<br>Each increase in CSS | 1.238 (1.145-1.338)                                                                                                                                  |
| Chandna 2010 | HRs                 | <b>Comorbidity severity score</b><br>Low comorbidity (CSS ≤ 4)<br>High comorbidity (CSS > 4)                                                                                                                                                                                        | Ref<br>1.823 (1.255-2.650)                                                                                                                           |
| Pieloch 2015 | HRs                 | <b>Kidney Transplant Morbidity Index</b><br>0<br>1<br>2<br>3<br>4<br>5<br>6<br>≥ 7                                                                                                                                                                                                  | Ref<br>1.85 (1.45-2.36)<br>3.11 (2.46-3.94)<br>5.00 (3.96-6.31)<br>7.37 (5.83-9.32)<br>9.41 (7.41-11.94)<br>12.15 (9.45-15.63)<br>13.03 (9.68-17.54) |
| Ritchie 2009 | HRs                 | <b>Heart failure, CKD and diabetes</b><br>Heart failure and CKD<br>Heart failure, CKD and diabetes                                                                                                                                                                                  | Ref<br>1.25 (1.07-1.46)                                                                                                                              |

Results from studies using other Multimorbidity Measures. HR; hazard ratio. CKD; chronic kidney disease.

| Reference       | Scores studied                                                  | Presentation of effect size |
|-----------------|-----------------------------------------------------------------|-----------------------------|
| Hemmelgarn 2003 | CCI<br>Development of ESRD modified CCI                         | Kaplan-Meier curves         |
| Di Iorio 2004   | CCI<br>Development of CCI modified for haemodialysis patients   | Relative risk, 5.5 for CCI  |
| van Manen 2002  | CCI<br>Khan index<br>Davies index<br>Development of a new index | Kaplan-Meier curves         |

Studies that analyse different Multimorbidity Measures. CCI; Charlson Comorbidity Index

## Supplementary File 4. Risk of bias: Results from Newcastle Ottawa Scale

| Reference               | Selection |   |   |   | Comparability | Outcome assessment |   |   | Quality score |
|-------------------------|-----------|---|---|---|---------------|--------------------|---|---|---------------|
|                         | 1         | 2 | 3 | 4 |               | 5                  | 6 | 7 |               |
| Beddhu 2000             |           | * | * | * | *             | *                  | * |   | 6             |
| Bowling 2016            | *         | * | * | * | *             | *                  | * |   | 7             |
| Chae 2010               |           | * | * | * | *             | *                  | * |   | 6             |
| Chandna 1999            |           | * | * | * | *             | *                  | * |   | 6             |
| Chandna 2010            |           | * | * | * |               | *                  | * |   | 5             |
| Davies 1995             |           | * | * | * | *             | *                  | * |   | 6             |
| Davies 2002             |           | * | * | * | *             | *                  | * |   | 6             |
| Di Iorio 2004           |           | * | * | * | *             | *                  | * |   | 6             |
| Ellam 2008              |           | * | * | * |               | *                  | * |   | 5             |
| Fernandez 2019          |           | * | * | * | *             | *                  | * |   | 6             |
| Fraser 2015             |           | * | * | * | *             | *                  | * |   | 6             |
| Fried 2001              |           | * | * | * | *             | *                  | * |   | 6             |
| Grosso 2012             |           | * | * | * | *             | *                  | * |   | 6             |
| Hemmelgarn 2003         |           | * | * | * | *             | *                  | * | * | 7             |
| Lee 2018                | *         | * | * | * | *             | *                  | * |   | 7             |
| Lhotta 2003             |           | * | * | * | *             | *                  | * |   | 6             |
| Park 2015               |           | * | * | * | *             | *                  | * |   | 6             |
| Pieloch 2015            |           | * | * | * | *             | *                  | * |   | 6             |
| Rattanasompattikul 2012 |           | * | * | * | *             | *                  | * |   | 6             |
| Ritchie 2009            |           | * | * | * | *             | *                  | * |   | 6             |
| Shum 2013               |           | * | * | * | *             | *                  | * |   | 6             |
| Tonelli 2015            | *         | * | * | * | *             | *                  | * |   | 7             |
| van Manen 2002          |           | * | * | * | *             | *                  | * |   | 6             |
| Wong 2007               |           | * | * | * | *             | *                  | * |   | 6             |
| Wu 2005                 |           | * | * | * | *             | *                  | * |   | 6             |
| Wu 2013                 |           | * | * | * | *             | *                  | * |   | 6             |

Table 3. Newcastle Ottawa Scale. 1. Representativeness of the exposed cohort. 2. Selection of the non-exposed cohort. 3. Ascertainment of chronic kidney disease/multimorbidity status. 4. Demonstration that outcomes were not present at start of study. 5. Comparability of cohorts on the basis of the design. 6. Assessment of outcome(s). 7. Was follow-up long enough. 8. Adequacy of follow up of cohort.

# Reporting checklist for meta-analysis of observational studies.

Based on the MOOSE guidelines.

## Instructions to authors

Complete this checklist by entering the page numbers from your manuscript where readers will find each of the items listed below.

Your article may not currently address all the items on the checklist. Please modify your text to include the missing information. If you are certain that an item does not apply, please write "n/a" and provide a short explanation.

Upload your completed checklist as an extra file when you submit to a journal.

In your methods section, say that you used the MOOSE reporting guidelines, and cite them as:

Stroup DF, Berlin JA, Morton SC, Olkin I, Williamson GD, Rennie D, Moher D, Becker BJ, Sipe TA, Thacker SB. Meta-analysis of observational studies in epidemiology: a proposal for reporting. Meta-analysis Of Observational Studies in Epidemiology (MOOSE) group. JAMA. 2000; 283(15):2008-2012.

|                   | Reporting Item                                                                                                                                                                                                                                                                                                                                        | Page Number |
|-------------------|-------------------------------------------------------------------------------------------------------------------------------------------------------------------------------------------------------------------------------------------------------------------------------------------------------------------------------------------------------|-------------|
| <b>Title</b>      |                                                                                                                                                                                                                                                                                                                                                       |             |
|                   | <a href="#">#1</a> Identify the study as a meta-analysis of observational research                                                                                                                                                                                                                                                                    | 1           |
| <b>Abstract</b>   |                                                                                                                                                                                                                                                                                                                                                       |             |
|                   | <a href="#">#2</a> Provide a structured summary including, as applicable: background; objectives; data sources; study eligibility criteria, participants, and interventions; study appraisal and synthesis methods; results; limitations; conclusions and implications of key findings; systematic review registration number (From PRISMA checklist) | 2, 3        |
| <b>Background</b> |                                                                                                                                                                                                                                                                                                                                                       |             |
|                   | <a href="#">#3a</a> Problem definition                                                                                                                                                                                                                                                                                                                | 4           |
|                   | <a href="#">#3b</a> Hypothesis statement                                                                                                                                                                                                                                                                                                              | 4           |
|                   | <a href="#">#3c</a> Description of study outcomes                                                                                                                                                                                                                                                                                                     | 5           |

|    |                     |                                                                                             |      |
|----|---------------------|---------------------------------------------------------------------------------------------|------|
| 1  | <a href="#">#3d</a> | Type of exposure or intervention used                                                       | 5    |
| 2  |                     |                                                                                             |      |
| 3  | <a href="#">#3e</a> | Type of study designs used                                                                  | 5    |
| 4  |                     |                                                                                             |      |
| 5  | <a href="#">#3f</a> | Study population                                                                            | 5    |
| 6  |                     |                                                                                             |      |
| 7  |                     |                                                                                             |      |
| 8  | <b>Methods</b>      |                                                                                             |      |
| 9  |                     |                                                                                             |      |
| 10 | Search              | <a href="#">#4a</a> Qualifications of searchers (eg, librarians and investigators)          | N/A  |
| 11 | strategy            |                                                                                             |      |
| 12 |                     |                                                                                             |      |
| 13 |                     |                                                                                             |      |
| 14 | Search              | <a href="#">#4b</a> Search strategy, including time period included in the synthesis and    | 5    |
| 15 | strategy            | keywords                                                                                    |      |
| 16 |                     |                                                                                             |      |
| 17 |                     |                                                                                             |      |
| 18 | Search              | <a href="#">#4c</a> Effort to include all available studies, including contact with authors | 5, 7 |
| 19 | strategy            |                                                                                             |      |
| 20 |                     |                                                                                             |      |
| 21 |                     |                                                                                             |      |
| 22 | Search              | <a href="#">#4d</a> Databases and registries searched                                       | 5    |
| 23 | strategy            |                                                                                             |      |
| 24 |                     |                                                                                             |      |
| 25 |                     |                                                                                             |      |
| 26 | Search              | <a href="#">#4e</a> Search software used, name and version, including special features used | 5    |
| 27 | strategy            | (eg, explosion)                                                                             |      |
| 28 |                     |                                                                                             |      |
| 29 |                     |                                                                                             |      |
| 30 | Search              | <a href="#">#4f</a> Use of hand searching (eg, reference lists of obtained articles)        | 5    |
| 31 | strategy            |                                                                                             |      |
| 32 |                     |                                                                                             |      |
| 33 |                     |                                                                                             |      |
| 34 | Search              | <a href="#">#4g</a> List of citations located and those excluded, including justification   | 7    |
| 35 | strategy            |                                                                                             |      |
| 36 |                     |                                                                                             |      |
| 37 |                     |                                                                                             |      |
| 38 | Search              | <a href="#">#4h</a> Method of addressing articles published in languages other than English | 5    |
| 39 | strategy            |                                                                                             |      |
| 40 |                     |                                                                                             |      |
| 41 |                     |                                                                                             |      |
| 42 | Search              | <a href="#">#4i</a> Method of handling abstracts and unpublished studies                    | 6    |
| 43 | strategy            |                                                                                             |      |
| 44 |                     |                                                                                             |      |
| 45 |                     |                                                                                             |      |
| 46 | Search              | <a href="#">#4j</a> Description of any contact with authors                                 | 7    |
| 47 | strategy            |                                                                                             |      |
| 48 |                     |                                                                                             |      |
| 49 |                     |                                                                                             |      |
| 50 |                     | <a href="#">#5a</a> Description of relevance or appropriateness of studies gathered for     | 8    |
| 51 |                     | assessing the hypothesis to be tested                                                       |      |
| 52 |                     |                                                                                             |      |
| 53 |                     | <a href="#">#5b</a> Rationale for the selection and coding of data (eg, sound clinical      | 7    |
| 54 |                     | principles or convenience)                                                                  |      |
| 55 |                     |                                                                                             |      |
| 56 |                     | <a href="#">#5c</a> Documentation of how data were classified and coded (eg, multiple       | 7    |
| 57 |                     | raters, blinding, and interrater reliability)                                               |      |
| 58 |                     |                                                                                             |      |
| 59 |                     |                                                                                             |      |
| 60 |                     |                                                                                             |      |

|    |                     |                                                                                                                                                                                                                                                                              |                                     |
|----|---------------------|------------------------------------------------------------------------------------------------------------------------------------------------------------------------------------------------------------------------------------------------------------------------------|-------------------------------------|
| 1  | <a href="#">#5d</a> | Assessment of confounding (eg, comparability of cases and controls in studies where appropriate)                                                                                                                                                                             | 7                                   |
| 2  |                     |                                                                                                                                                                                                                                                                              |                                     |
| 3  |                     |                                                                                                                                                                                                                                                                              |                                     |
| 4  |                     |                                                                                                                                                                                                                                                                              |                                     |
| 5  | <a href="#">#5e</a> | Assessment of study quality, including blinding of quality assessors; stratification or regression on possible predictors of study results                                                                                                                                   | 7                                   |
| 6  |                     |                                                                                                                                                                                                                                                                              |                                     |
| 7  |                     |                                                                                                                                                                                                                                                                              |                                     |
| 8  |                     |                                                                                                                                                                                                                                                                              |                                     |
| 9  | <a href="#">#5f</a> | Assessment of heterogeneity                                                                                                                                                                                                                                                  | 7                                   |
| 10 |                     |                                                                                                                                                                                                                                                                              |                                     |
| 11 | <a href="#">#5g</a> | Description of statistical methods (eg, complete description of fixed or random effects models, justification of whether the chosen models account for predictors of study results, dose-response models, or cumulative meta-analysis) in sufficient detail to be replicated | 7                                   |
| 12 |                     |                                                                                                                                                                                                                                                                              |                                     |
| 13 |                     |                                                                                                                                                                                                                                                                              |                                     |
| 14 |                     |                                                                                                                                                                                                                                                                              |                                     |
| 15 |                     |                                                                                                                                                                                                                                                                              |                                     |
| 16 |                     |                                                                                                                                                                                                                                                                              |                                     |
| 17 |                     |                                                                                                                                                                                                                                                                              |                                     |
| 18 | <a href="#">#5h</a> | Provision of appropriate tables and graphics                                                                                                                                                                                                                                 | 16, 17, 18,<br>supplemental<br>file |
| 19 |                     |                                                                                                                                                                                                                                                                              |                                     |
| 20 |                     |                                                                                                                                                                                                                                                                              |                                     |
| 21 |                     |                                                                                                                                                                                                                                                                              |                                     |
| 22 |                     |                                                                                                                                                                                                                                                                              |                                     |
| 23 | <b>Results</b>      |                                                                                                                                                                                                                                                                              |                                     |
| 24 |                     |                                                                                                                                                                                                                                                                              |                                     |
| 25 | <a href="#">#6a</a> | Graphic summarizing individual study estimates and overall estimate                                                                                                                                                                                                          | N/A                                 |
| 26 |                     |                                                                                                                                                                                                                                                                              |                                     |
| 27 |                     |                                                                                                                                                                                                                                                                              |                                     |
| 28 | <a href="#">#6b</a> | Table giving descriptive information for each study included                                                                                                                                                                                                                 | 16, 17, 18                          |
| 29 |                     |                                                                                                                                                                                                                                                                              |                                     |
| 30 | <a href="#">#6c</a> | Results of sensitivity testing (eg, subgroup analysis)                                                                                                                                                                                                                       | N/A                                 |
| 31 |                     |                                                                                                                                                                                                                                                                              |                                     |
| 32 | <a href="#">#6d</a> | Indication of statistical uncertainty of findings                                                                                                                                                                                                                            | 10                                  |
| 33 |                     |                                                                                                                                                                                                                                                                              |                                     |
| 34 |                     |                                                                                                                                                                                                                                                                              |                                     |
| 35 | <b>Discussion</b>   |                                                                                                                                                                                                                                                                              |                                     |
| 36 |                     |                                                                                                                                                                                                                                                                              |                                     |
| 37 | <a href="#">#7a</a> | Quantitative assessment of bias (eg, publication bias)                                                                                                                                                                                                                       | N/A                                 |
| 38 |                     |                                                                                                                                                                                                                                                                              |                                     |
| 39 | <a href="#">#7b</a> | Justification for exclusion (eg, exclusion of non-English-language citations)                                                                                                                                                                                                | N/A                                 |
| 40 |                     |                                                                                                                                                                                                                                                                              |                                     |
| 41 |                     |                                                                                                                                                                                                                                                                              |                                     |
| 42 |                     |                                                                                                                                                                                                                                                                              |                                     |
| 43 | <a href="#">#7c</a> | Assessment of quality of included studies                                                                                                                                                                                                                                    | 11                                  |
| 44 |                     |                                                                                                                                                                                                                                                                              |                                     |
| 45 |                     |                                                                                                                                                                                                                                                                              |                                     |
| 46 | <b>Conclusion</b>   |                                                                                                                                                                                                                                                                              |                                     |
| 47 |                     |                                                                                                                                                                                                                                                                              |                                     |
| 48 | <a href="#">#8a</a> | Consideration of alternative explanations for observed results                                                                                                                                                                                                               | N/A                                 |
| 49 |                     |                                                                                                                                                                                                                                                                              |                                     |
| 50 | <a href="#">#8b</a> | Generalization of the conclusions (ie, appropriate for the data presented and within the domain of the literature review)                                                                                                                                                    | 12                                  |
| 51 |                     |                                                                                                                                                                                                                                                                              |                                     |
| 52 |                     |                                                                                                                                                                                                                                                                              |                                     |
| 53 |                     |                                                                                                                                                                                                                                                                              |                                     |
| 54 | <a href="#">#8c</a> | Guidelines for future research                                                                                                                                                                                                                                               | 12                                  |
| 55 |                     |                                                                                                                                                                                                                                                                              |                                     |
| 56 | <a href="#">#8d</a> | Disclosure of funding source                                                                                                                                                                                                                                                 | 15                                  |
| 57 |                     |                                                                                                                                                                                                                                                                              |                                     |
| 58 |                     |                                                                                                                                                                                                                                                                              |                                     |

Notes:

For peer review only - <http://bmjopen.bmj.com/site/about/guidelines.xhtml>



- 1 • 5h: 16, 17, 18, supplemental file Reproduced with permission from JAMA. 2000. 283(15):2008-2012.  
2 Copyright © 2000 American Medical Association. All rights reserved. This checklist was completed on 09.  
3 March 2020 using <https://www.goodreports.org/>, a tool made by the [EQUATOR Network](#) in collaboration  
4 with [Penelope.ai](#)  
5  
6  
7  
8  
9  
10  
11  
12  
13  
14  
15  
16  
17  
18  
19  
20  
21  
22  
23  
24  
25  
26  
27  
28  
29  
30  
31  
32  
33  
34  
35  
36  
37  
38  
39  
40  
41  
42  
43  
44  
45  
46  
47  
48  
49  
50  
51  
52  
53  
54  
55  
56  
57  
58  
59  
60

For peer review only

# BMJ Open

## Associations between multimorbidity and adverse clinical outcomes in patients with chronic kidney disease: a systematic review and meta-analysis

|                                 |                                                                                                                                                                                                                                                                                                                                                                                                                                                                                                              |
|---------------------------------|--------------------------------------------------------------------------------------------------------------------------------------------------------------------------------------------------------------------------------------------------------------------------------------------------------------------------------------------------------------------------------------------------------------------------------------------------------------------------------------------------------------|
| Journal:                        | <i>BMJ Open</i>                                                                                                                                                                                                                                                                                                                                                                                                                                                                                              |
| Manuscript ID                   | bmjopen-2020-038401.R2                                                                                                                                                                                                                                                                                                                                                                                                                                                                                       |
| Article Type:                   | Original research                                                                                                                                                                                                                                                                                                                                                                                                                                                                                            |
| Date Submitted by the Author:   | 01-Jun-2020                                                                                                                                                                                                                                                                                                                                                                                                                                                                                                  |
| Complete List of Authors:       | Sullivan, Michael; University of Glasgow, Institute of Cardiovascular and Medical Sciences<br>Rankin, Alastair; University of Glasgow, Institute of Cardiovascular and Medical Sciences<br>Jani, Bhautesh; University of Glasgow, General Practice and Primary Care, Institute of Health and Wellbeing<br>Mair, Frances; University of Glasgow, General Practice and Primary Care, Institute of Health and Wellbeing<br>Mark, Patrick; University of Glasgow, Institute of Cardiovascular & Medical Sciences |
| <b>Primary Subject Heading</b>: | Renal medicine                                                                                                                                                                                                                                                                                                                                                                                                                                                                                               |
| Secondary Subject Heading:      | Epidemiology, General practice / Family practice                                                                                                                                                                                                                                                                                                                                                                                                                                                             |
| Keywords:                       | Chronic renal failure < NEPHROLOGY, Dialysis < NEPHROLOGY, Diabetic nephropathy & vascular disease < DIABETES & ENDOCRINOLOGY, Ischaemic heart disease < CARDIOLOGY, End stage renal failure < NEPHROLOGY                                                                                                                                                                                                                                                                                                    |
|                                 |                                                                                                                                                                                                                                                                                                                                                                                                                                                                                                              |

SCHOLARONE™  
Manuscripts



I, the Submitting Author has the right to grant and does grant on behalf of all authors of the Work (as defined in the below author licence), an exclusive licence and/or a non-exclusive licence for contributions from authors who are: i) UK Crown employees; ii) where BMJ has agreed a CC-BY licence shall apply, and/or iii) in accordance with the terms applicable for US Federal Government officers or employees acting as part of their official duties; on a worldwide, perpetual, irrevocable, royalty-free basis to BMJ Publishing Group Ltd ("BMJ") its licensees and where the relevant Journal is co-owned by BMJ to the co-owners of the Journal, to publish the Work in this journal and any other BMJ products and to exploit all rights, as set out in our [licence](#).

The Submitting Author accepts and understands that any supply made under these terms is made by BMJ to the Submitting Author unless you are acting as an employee on behalf of your employer or a postgraduate student of an affiliated institution which is paying any applicable article publishing charge ("APC") for Open Access articles. Where the Submitting Author wishes to make the Work available on an Open Access basis (and intends to pay the relevant APC), the terms of reuse of such Open Access shall be governed by a Creative Commons licence – details of these licences and which [Creative Commons](#) licence will apply to this Work are set out in our licence referred to above.

Other than as permitted in any relevant BMJ Author's Self Archiving Policies, I confirm this Work has not been accepted for publication elsewhere, is not being considered for publication elsewhere and does not duplicate material already published. I confirm all authors consent to publication of this Work and authorise the granting of this licence.

1  
2 **Associations between multimorbidity and adverse clinical outcomes in patients**  
3  
4 **with chronic kidney disease: a systematic review and meta-analysis**  
5  
6

7 Michael Sullivan<sup>1</sup>, Alastair Rankin<sup>1</sup>, Bhautesh Dinesh Jani<sup>2</sup>, Frances S Mair<sup>2</sup>, Patrick B  
8  
9 Mark<sup>1</sup>  
10  
11  
12

13  
14 1 – Institute of Cardiovascular and Medical Sciences, University of Glasgow, Glasgow, UK  
15

16 2 – General Practice and Primary Care, Institute of Health and Wellbeing, University of  
17  
18 Glasgow, Glasgow, UK  
19  
20  
21  
22

23 **Corresponding author:**  
24

25 Michael Sullivan  
26

27 Address: Institute of Cardiovascular and Medical Sciences, University of Glasgow, 126  
28

29 University Place, Glasgow, G12 8TA, UK  
30  
31

32 Telephone: +44(0) 141 330 2677  
33

34 Email: [Michael.sullivan@glasgow.ac.uk](mailto:Michael.sullivan@glasgow.ac.uk)  
35

36  
37 Twitter Handle: @sullivanmk8  
38  
39  
40

41 **Keywords:** chronic kidney disease, dialysis, comorbid, multimorbidity, diabetes,  
42  
43 cardiovascular  
44  
45  
46  
47  
48  
49  
50  
51  
52  
53  
54  
55  
56  
57  
58  
59  
60

## Abstract

*Objective:* To systematically review the literature exploring the associations between multimorbidity (the presence of two or more long term conditions (LTCs)) and adverse clinical outcomes in patients with chronic kidney disease (CKD).

*Design:* Systematic Review and Meta-analysis.

*Data sources:* MEDLINE, EMBASE, CINAHL, Cochrane Library and SCOPUS (1946-2019).

The main search terms were “Chronic Kidney Failure” and “Multimorbid\*”.

*Eligibility Criteria:* Observational studies of adults over the age of 18 with CKD stages three to five i.e. eGFR less than 60ml/minute/1.73m<sup>2</sup>. The exposure was Multimorbidity quantified by Measures and the outcomes were all-cause mortality, renal progression, hospitalisation and cardiovascular events. We did not consider CKD as a co-morbid LTC.

*Data Extraction and Synthesis:* Newcastle Ottawa Scale for quality appraisal and risk of bias assessment and fixed-effects meta-analysis for data synthesis.

*Results:* Of 1852 papers identified, 26 met the inclusion criteria. 21 papers involved patients with advanced CKD and no studies were from low or middle income countries. All-cause mortality was an outcome in all studies. Patients with multimorbidity were at higher risk of mortality compared to patients without multimorbidity (Total risk ratio 2.28 (95% confidence interval 1.81-2.88)). The risk of mortality was higher with increasing multimorbidity (Total hazard ratio 1.31 (1.27-1.36)) and both concordant and discordant LTCs were associated with heightened risk. Multimorbidity was associated with renal progression in four studies, hospitalisation in five studies and cardiovascular events in two studies.

*Limitations:* Meta-analysis could only include 10 of 26 papers as the methodologies of studies were heterogeneous.

*Conclusions:* There are associations between multimorbidity and adverse clinical outcomes in patients with CKD. However, most data relate to mortality risk in patients with advanced CKD. There is limited evidence regarding patients with mild to moderate CKD, outcomes

1  
2 such as cardiovascular events, types of LTCs and regarding patients from low or middle  
3  
4 income countries.  
5

6 *Prospero Registration:* CRD42019147424.  
7  
8  
9

## 10 **Article Summary**

### 11 **Strengths and limitations of this study**

- 12  
13  
14  
15  
16 • This review is the first to synthesise the existing evidence on multimorbidity in patients  
17 with CKD and it included a range of settings.
- 18  
19  
20 • The outcomes of interest were chosen by researchers and these do not include all  
21 outcomes that are important to patients e.g. quality of life.
- 22  
23  
24  
25 • Two authors independently performed paper selection, data extraction and quality  
26 appraisal.
- 27  
28  
29  
30 • Meta-analysis was performed, but only included selected papers because of  
31 methodological heterogeneity of papers.  
32  
33  
34  
35  
36  
37  
38  
39  
40  
41  
42  
43  
44  
45  
46  
47  
48  
49  
50  
51  
52  
53  
54  
55  
56  
57  
58  
59  
60

## Introduction

Multimorbidity is the presence of two or more long-term conditions (LTCs)<sup>1</sup>. In a Scottish study of 1.8 million patients, it was found to affect 23% of the whole population and in particular those from areas of lower socioeconomic status<sup>2</sup>. It is a problem for individual patients because it is associated with complex treatment regimens that result in a high burden of treatment and reduced quality of life<sup>3</sup>. For clinicians and health services, caring for these individuals represents a huge workload and equates to approximately two thirds of health care spending<sup>4</sup>. The current disease-orientated approaches of guidelines and healthcare are inadequate for patients with multiple LTCs and complex needs<sup>5</sup>.

Multimorbidity is more common in patients with chronic kidney disease (CKD) than any other LTC: e.g. among 2.5 million Canadians, patients with CKD had more co-morbid LTCs than patients with lung disease (mean 4.2 LTCs versus 2.8)<sup>6</sup>. The prevalence of CKD is around 12%<sup>7</sup> and as this rises globally, the adverse effects of CKD and multimorbidity on quality of life are increasing<sup>8</sup>. The leading cause of death in patients with CKD is cardiovascular disease and although this is partly related to risk factors common to both conditions, low estimated glomerular filtration rate (eGFR) and proteinuria are predictors of cardiovascular mortality<sup>9, 10</sup>. The higher cardiovascular risk observed among CKD patients is independent of traditional atherosclerotic risk factors such as hypertension and dyslipidaemia, but the reasons for this and the influence of multimorbidity on CKD are incompletely understood. CKD and multimorbidity therefore occur together frequently and there are a number of issues common to both problems such as polypharmacy and significant treatment burden<sup>11</sup>. We undertook this systematic review to establish the current evidence concerning associations between multimorbidity and adverse clinical outcomes in patients with CKD.

## Materials and Methods

The Preferred Reporting Items for Systematic Reviews and Meta-Analyses Protocols (PRISMA-P) guidelines were followed<sup>12</sup> and this review was registered with the International Prospective Register of Systematic Reviews (CRD42019147424).

### *Literature Search*

A comprehensive search strategy identified studies of patients with CKD that investigated the associations between multimorbidity and adverse clinical outcomes (see Supplementary File 1 for search terms). We included observational studies; in particular those using electronic health care records. There was no restriction on sample size. The databases searched included studies from 1946 to 2019. The search was limited to papers published in English. Databases searched were MEDLINE (OVID interface), EMBASE (OVID interface), CINAHL Complete (EBSCO interface), The Cochrane Library (OVID interface), and SCOPUS. Selected medical subject headings were combined with keywords relating to multimorbidity and CKD to create a search strategy which was produced for use in MEDLINE and amended for use in the other databases, using controlled vocabulary, Boolean operators and search symbols. The search was carried out to include literature published up to 29<sup>th</sup> August 2019. The results were supplemented with searches of reference lists of included studies. Search data were stored and merged using Endnote X9 (Clarivate Analytics, Philadelphia, USA) and papers were shared and assessed using DistillerSR (Evidence Partners, Ottawa, Canada).

### *Inclusion Criteria*

We included empirical quantitative studies that contained data on associations between Multimorbidity Measures and all-cause mortality or additional outcomes in adults with CKD. We accepted any Multimorbidity Measure, which included simple counts of LTCs and co-morbidity scoring systems. We did not consider CKD as a co-morbid LTC because all of the patients in our papers had CKD. Additional outcomes were hospitalisation, cardiovascular



1  
2 events, cardiovascular deaths, heart failure hospitalisations and renal progression (40%  
3  
4 reduction in eGFR, doubling of serum creatinine or initiation of renal replacement therapy  
5  
6 (RRT)). Studies that analysed the relationship between a Multimorbidity Measure and any  
7  
8 of our outcomes of interest were included in adults over the age of 18 with CKD stages three  
9  
10 to five i.e. eGFR less than 60ml/minute/1.73m<sup>2</sup> including those requiring RRT i.e.  
11  
12 haemodialysis (HD), peritoneal dialysis (PD) or renal transplantation.  
13  
14

### 15 16 *Exclusion Criteria*

17  
18 Review articles, drug intervention studies, qualitative studies, case reports and conference  
19  
20 abstracts were excluded. Studies with children or adolescents aged 18 or under, animals  
21  
22 and individuals without CKD were excluded.  
23  
24

25  
26 The study selection process was conducted by two reviewers (MS, AR). Title screening was  
27  
28 followed by abstract and full paper review, where necessary. Any inter-reviewer  
29  
30 disagreements were resolved by a third reviewer (PM).  
31  
32

### 33 34 *Data extraction*

35  
36 As recommended by the Cochrane Handbook<sup>13</sup>, data were extracted in a Population,  
37  
38 Exposure, Comparator, Outcomes (PECO) approach:  
39  
40

41 Population: We extracted data on the characteristics of study populations: country, sample  
42  
43 size, follow-up time and setting i.e. CKD, HD, PD, renal transplant and conservative care.  
44  
45

46 Exposure: We extracted the Multimorbidity Measure used in each study and whether LTCs  
47  
48 were categorised into different types for analysis.  
49  
50

51 Comparator: We extracted the details provided of comparator groups i.e. patients with CKD  
52  
53 with less than two LTCs. We did not count CKD as an LTC.  
54  
55  
56  
57  
58  
59  
60

1  
2 Outcomes: We extracted details of the statistical analyses employed to evaluate the  
3  
4 relationship between Multimorbidity Measure and outcomes. Risks were expressed as effect  
5  
6 sizes with 95% confidence intervals, where available.  
7

### 8 9 *Data synthesis and analysis*

10  
11 Results were presented in a narrative format. Where possible, fixed effects meta-analysis  
12  
13 was performed for the primary outcome, all-cause mortality. Previous systematic reviews  
14  
15 including patients from the general population have demonstrated consistent associations  
16  
17 between multimorbidity and mortality<sup>14</sup>. We assumed the direction of effect of multimorbidity  
18  
19 on mortality would be consistent across our studies, barring sampling errors and differences  
20  
21 in sample size, and so we applied fixed effects models. However, random effects models  
22  
23 were also performed as sensitivity analysis, as this approach would be more helpful if the  
24  
25 participants in the included studies were inherently different. The Generic Inverse Variance  
26  
27 method was used where multimorbidity was expressed as a continuous variable and the  
28  
29 Mantel-Haenszel method was used where multimorbidity was expressed as a categorical  
30  
31 variable. Quantification of statistical heterogeneity was assessed by means of  $I^2$ , which  
32  
33 shows the percentage of total variation across studies due to heterogeneity<sup>13</sup>. These  
34  
35 analyses were carried out using RevMan Version 5.3 (The Cochrane Collaboration,  
36  
37 Copenhagen, Denmark). Meta-analysis was limited by heterogeneous methodologies:  
38  
39 variable Multimorbidity Measures, use of effect sizes (Hazard ratios (HRs), Risk ratios  
40  
41 (RRs), Kaplan Meier curves) and the use of multimorbidity as a continuous and categorical  
42  
43 variable. We therefore performed meta-analysis where several studies used similar  
44  
45 methodologies. Data on numbers of deceased patients were not available for all studies and  
46  
47 so we contacted study authors for their primary data. For meta-analysis and where  
48  
49 necessary and possible, we calculated RRs for studies, comparing patients with  
50  
51 multimorbidity to those without multimorbidity. HRs could not be calculated as there were  
52  
53 no individual time-to-event data.  
54  
55  
56  
57  
58  
59  
60

## Quality appraisal

Two researchers conducted quality appraisal independently (MS, AR). Studies were assessed using an adapted Newcastle-Ottawa quality assessment scale (NOS), as informed by the Cochrane Handbook<sup>13</sup> (see Supplementary File 2). Studies were not excluded based on quality appraisal.

## Patient and public involvement

No patients involved.

## Results

### Search results

Figure 1 demonstrates the literature search flow. After the removal of duplicate papers, 1852 papers were identified. 1756 papers were excluded as they were not relevant and so 96 full papers were screened and 26 papers met our eligibility criteria and were included in the review<sup>15-40</sup>.

### Study characteristics

Table 1 lists the characteristics of the 26 included studies. The studies were published between 1995 and 2019 and all used a cohort design. The size of populations was between 69 and 821,334. Fourteen studies examined subjects predominantly on dialysis<sup>15, 17-22, 25, 27, 30, 33, 35, 33, 40</sup>; five included patients with CKD stages 3 to 5<sup>16, 24, 24, 34, 36</sup> including two with mild CKD<sup>24, 34</sup>; two involved patients with CKD stage 5 including those not on RRT or conservative care<sup>29, 31</sup>; two included those receiving conservative care<sup>23, 38</sup>; three included renal transplant recipients<sup>26, 32, 39</sup>.

Table 2 shows the number of studies using each Multimorbidity Measure and how the corresponding effect sizes were presented: as a categorical or a continuous variable. In addition to these, three studies examined more than one Multimorbidity Measure: comparing how effectively each measure predicted outcomes<sup>22, 27, 37</sup>. Ten studies used the Charlson Comorbidity Index (CCI) or a modification of this scale (mCCI)<sup>15, 17, 25, 26, 30, 31, 33, 35, 39, 40</sup>.

1  
2 Seven studies used the number of LTCs i.e. condition count<sup>16, 23, 24, 28, 29, 36, 38</sup>. Two studies  
3  
4 used the Stoke comorbidity grade, which uses condition count to divide patients into low,  
5  
6 intermediate and high grades<sup>20, 21</sup>. Two studies used the Comorbidity severity score<sup>18, 19</sup>.  
7  
8 One study compared those with CKD, diabetes and heart failure to those with just CKD and  
9  
10 heart failure<sup>34</sup>. One study used the Kidney Transplant Morbidity Index<sup>32</sup>.

11  
12 All studies reported the effect of multimorbidity on all-cause mortality. Five studies reported  
13  
14 the effect of multimorbidity on hospitalisation<sup>15, 19, 34-36</sup> and four on renal progression<sup>26, 28, 32,</sup>  
15  
16  
17  
18  
19  
20  
21  
22  
23  
24  
25  
26  
27  
28  
29  
30  
31  
32  
33  
34  
35  
36  
37  
38  
39  
40  
41  
42  
43  
44  
45  
46  
47  
48  
49  
50  
51  
52  
53  
54  
55  
56  
57  
58  
59  
60  
39. One study reported the effect of multimorbidity on heart failure hospitalisation and  
cardiovascular death<sup>34</sup> and one study reported the effect of multimorbidity on myocardial  
infarction<sup>36</sup>. Twelve studies expressed effect sizes using multimorbidity as a categorical  
variable<sup>16-18, 24, 26, 28, 32-34, 36, 39, 40</sup>, nine as a continuous variable<sup>15, 19-21, 25, 29, 30, 35, 38</sup> and one  
as both<sup>31</sup>. One study gave a narrative comparison of groups<sup>23</sup> and two used Kaplan-Meier  
curves<sup>27, 37</sup>. Two studies categorised LTCs into types: both used concordant and discordant  
as types and one also specified mental health and chronic pain LTCs<sup>16, 36</sup>.

### *Main findings*

37  
38  
39  
40  
41  
42  
43  
44  
45  
46  
47  
48  
49  
50  
51  
52  
53  
54  
55  
56  
57  
58  
59  
60  
The results of the included studies were summarised in Supplementary File 3. Some papers  
did not provide adjusted HRs. To make it easier to compare the studies, we therefore quoted  
unadjusted HRs. Where multimorbidity was used as a categorical variable, 12 of 13 studies  
found that patients with multimorbidity had higher rates of mortality than patients without  
multimorbidity. In the one study that did not detect a difference, Lee *et al*'s primary outcome  
was renal progression<sup>28</sup>. For all-cause mortality, the authors provided event rates and  
Kaplan Meier Curves but there were no HRs with adjustments for confounding variables.

Where multimorbidity was used as a continuous variable, 10 of 11 studies found that with  
each increase in Multimorbidity Measure, all-cause mortality was higher. In the one study to  
not detect a difference, Ellam *et al* was a study of just 69 conservatively-managed patients<sup>23</sup>.

1  
2 Of the four studies that reported renal progression, three were in renal transplant  
3 recipients<sup>26, 31, 32</sup>. All four studies demonstrated higher rates of renal progression in patients  
4 with multimorbidity (HRs from each study 2.97 (1.53-5.76), 2.44 (1.19-5.02), 3.11 (2.55-  
5 3.80), 1.42 (1.02-1.97)). Renal progression was defined by graft loss or RRT initiation and  
6 one paper reported significant annual reductions in eGFR by increasing number of LTCs<sup>28</sup>.  
7 Five studies reported rates of hospitalisation and all of these identified an association  
8 between multimorbidity and hospitalisation<sup>15, 19, 34-36</sup>.

9  
10  
11 One paper reported rates of Heart Failure Hospitalisation and Cardiovascular Death<sup>34</sup>:  
12 patients with multimorbidity had higher rates of both outcomes than patients without  
13 multimorbidity. One paper reported higher rates of Myocardial Infarction in patients with  
14 multimorbidity<sup>36</sup>.

15  
16  
17 Two papers described the influence of concordant and discordant LTCs on adverse  
18 outcomes<sup>16, 36</sup>. These papers found that both types of LTC were associated with higher rates  
19 of mortality. One paper found that the rates of outcomes were higher in patients with at least  
20 one discordant LTC compared to patients with only concordant LTCs<sup>16</sup>. No association was  
21 identified between mental health and chronic pain LTCs and Myocardial Infarction<sup>36</sup>.

### 41 *Meta-analysis*

42  
43 Data synthesis was problematic because each study reported different effect sizes for  
44 different categorical groups. We therefore performed meta-analysis for all-cause mortality  
45 where several studies used comparable methodologies. Figure 2 included studies that used  
46 CCI as a continuous variable, demonstrating that with each increase in CCI, the risk of  
47 mortality was higher (Total HR 1.31 (95% confidence interval 1.27-1.36)). All studies  
48 included in this meta-analysis had HRs available. Figure 3 included studies that used  
49 condition count as a categorical variable: demonstrating that patients with multimorbidity  
50 were at higher risk of mortality compared to patients without multimorbidity (Total RR 2.28  
51  
52  
53  
54  
55  
56  
57  
58  
59  
60

1 (95% confidence interval 1.81-2.88)). Risk ratio were used here because time to event data  
2 were not available for all these studies and so hazard ratios could not be calculated. There  
3  
4 were considerable statistical heterogeneity in the studies included in each meta-analysis ( $I^2$   
5  
6 97% in figure 2 and 78% in figure 3). Sub-group analyses were not possible such as for  
7  
8 patients with mild-moderate CKD because there were inadequate studies. Where random  
9  
10 effects models were fitted, there remained significant associations between multimorbidity  
11  
12 and all-cause mortality (Supplemental File 4). For studies that used CCI as a continuous  
13  
14 variable, the risk of mortality was higher for each increase in CCI (Total HR 1.37 (95%  
15  
16 confidence interval 1.07-1.75)). For studies that used condition count as a categorical  
17  
18 variable, patients with multimorbidity were at higher risk of mortality compared to patients  
19  
20 without multimorbidity (Total RR 2.53 (95% confidence interval 1.57-4.07)).  
21  
22  
23  
24  
25

### 26 *Risk of bias*

27  
28 All studies selected patients with and without multimorbidity from the same cohort and used  
29  
30 either secure medical records or structured interviews to collect data. Most studies included  
31  
32 just one group of patients with CKD such as patients receiving HD and only three studies  
33  
34 included patients with a true range of mild to severe CKD<sup>16, 28, 36</sup>. All but two studies  
35  
36 controlled for factors such as ischaemic heart disease, age or diabetes<sup>18, 23</sup>. Only one study  
37  
38 made a statement about subjects who were lost to follow-up<sup>27</sup>. However, as all the studies  
39  
40 were based on health care databases, it is reasonable to assume complete or near-complete  
41  
42 follow-up. All studies followed up patients for more than one year, but there was variation in  
43  
44 the average length of follow-up (from 13.1 to 81.6 months). Four studies did not specify the  
45  
46 average follow-up time but from their survival analyses, it was clear that patients were  
47  
48 followed up for at least one year<sup>26, 31, 37, 40</sup>.  
49  
50  
51  
52  
53

54  
55 The NOS score evaluation of each study was between five and seven stars (See  
56  
57 Supplementary File 5). The two studies that did not control for confounding factors were  
58  
59  
60

1  
2 “poor” quality as per Agency for Healthcare Research and Quality standards<sup>18, 23, 41</sup>. The  
3  
4 remainder were “good” quality<sup>15-17, 19-22, 24-40</sup>.  
5

## 6 7 **Discussion**

8  
9 To the best of our knowledge, this is the first systematic review and meta-analysis to  
10  
11 synthesise the existing evidence on the associations between multimorbidity and outcomes  
12  
13 specific to patients with CKD. It is increasingly recognised that multimorbidity and the  
14  
15 management of patients with disease clusters are challenging problems<sup>42</sup>. The medical  
16  
17 profession has been given a mandate to improve the care of patients affected by  
18  
19 multimorbidity and to do so, improving our understanding of the issues will be fundamental.  
20  
21 Multimorbidity has been studied in the general population, with clear associations reported  
22  
23 between it and high rates of mortality<sup>43</sup>. It is time for researchers to build a body of evidence  
24  
25 about patients with kidney disease. Our review demonstrates that for patients with CKD,  
26  
27 multimorbidity is associated with high rates of mortality, and the risk is higher with increasing  
28  
29 numbers of LTCs. Unfortunately, the literature provides little detail beyond this association.  
30  
31 Of the papers in the review, only two categorised LTCs and studied whether the type of  
32  
33 LTCs influenced outcomes. Tonelli *et al* and Bowling *et al* found that concordant LTCs such  
34  
35 as diabetes were associated with high rates of mortality, but so were discordant or unrelated  
36  
37 LTCs like cancer and depression<sup>16, 36</sup>. Bowling *et al* found that the presence of one or more  
38  
39 discordant LTC conferred higher risk compared to patients with only concordant LTCs. This  
40  
41 suggests that there are groups of patients in whom it is not just the number but also the type  
42  
43 of LTCs that puts them at elevated risk. Further research is needed into what patterns or  
44  
45 clusters of disease exist to help clinicians understand the risks faced by patients with CKD  
46  
47 and multimorbidity.  
48  
49  
50  
51  
52  
53

54  
55 Patients require clinicians to help with their overall health and quality of life, not just the  
56  
57 status of individual LTCs. As seen in the Standardized Outcomes in  
58  
59 Nephrology–Hemodialysis (SONG-HD) initiative, patients usually wish to understand the  
60

1 risks they face. However, there is often a mismatch between the outcomes regarded as  
2 important by patients to those emphasised in clinical guidelines<sup>44, 45</sup>. It is therefore  
3  
4  
5  
6 imperative that we consider patient-oriented outcomes when studying multimorbidity and  
7  
8 ensure that research leads to improvements in care for patients. A limitation of our review is  
9  
10 that we did not summarise outcomes prioritised by patients. The merit in investigating  
11  
12 multimorbidity in patients with CKD will be that patients and clinicians will have an improved  
13  
14 understanding of the risks they face. They will therefore be able to prioritise particular  
15  
16 interventions such as cardiovascular risk factor modification and vascular access creation.  
17  
18

19  
20 Despite the methodological and clinical heterogeneity of the studies in our review, the  
21  
22 findings are consistent with existing literature<sup>11</sup>. We have confirmed associations between  
23  
24 multimorbidity and adverse clinical outcomes in RRT and non-RRT settings, and in a range  
25  
26 of countries. 21 of 26 studies included patients with advanced CKD including those on RRT.  
27  
28 However, it should be noted that there was no information available from low or middle  
29  
30 income countries. Mild to moderate CKD was also under-represented, despite this  
31  
32 constituting 99% of the patients with CKD<sup>46</sup>. Multimorbidity in patients with CKD from low  
33  
34 and middle income countries and in those with mild to moderate CKD should therefore be  
35  
36 targets for future research. Only two studies assessed the influence of multimorbidity on  
37  
38 cardiovascular outcomes<sup>34, 36</sup>. Cardiovascular morbidity and mortality is the most significant  
39  
40 risk for patients with CKD and many of the LTCs that occur in patients with CKD are risk  
41  
42 factors for cardiovascular events<sup>10</sup>. Further research is therefore needed to explore how  
43  
44 multimorbidity influences cardiovascular events in patients with CKD. Of the four studies  
45  
46 that examined the influence of multimorbidity on renal progression, all but one were in  
47  
48 patients with renal transplants. The study in non-transplant patients identified an association  
49  
50 between multimorbidity and renal progression<sup>28</sup>. This risk is a significant one, particularly for  
51  
52 the patients who develop the need for RRT. Many patient cohorts around the world have  
53  
54  
55  
56  
57  
58  
59  
60



1  
2 ample follow-up data and so the influence of multimorbidity on renal progression in non-  
3  
4 transplant cohorts should be studied in greater detail.  
5

6  
7 The studies included in our review are heterogenous. Clinical heterogeneity is evident in the  
8  
9 range of populations studied: stage 3 CKD, HD, PD, transplant and conservative care. There  
10  
11 are high levels of methodological and statistical heterogeneity. There is no consensus as to  
12  
13 which Multimorbidity Measure should be used, and which measure is the most effective at  
14  
15 predicting adverse outcomes<sup>47</sup>. CCI was the most commonly used measure, although a  
16  
17 number of modifications have been made for use in populations with CKD. Three studies  
18  
19 included in this review compared different Multimorbidity Measures. CCI was found to  
20  
21 effectively predict mortality risk, with other scoring systems performing comparably and  
22  
23 none superior to the rest. Although our work demonstrates that various Multimorbidity  
24  
25 Measures are associated with adverse clinical outcomes, we have not identified the best  
26  
27 Multimorbidity Measure for risk prediction.  
28  
29  
30  
31

32  
33 It has been recognised that there are fewer randomised controlled trials (RCTs) to assess  
34  
35 the efficacy of interventions in patients with CKD than in other medical specialties and that  
36  
37 patients with CKD are often excluded from RCTs<sup>48, 49</sup>. Furthermore, patients with advanced  
38  
39 CKD that are included in RCTs are not representative of the wider population of those with  
40  
41 CKD<sup>50</sup>. Similar observations have been made in other fields, whereby subjects with  
42  
43 multimorbidity are underrepresented in trials of novel interventions<sup>51</sup>. Therefore, to improve  
44  
45 outcomes for patients with CKD, both epidemiological studies and RCTs need to account  
46  
47 for the range of multimorbidity in patients with CKD. A strength of our review is that it brings  
48  
49 together information about the effects of multimorbidity in patients with CKD from various  
50  
51 settings to create a comprehensive picture of the effects on different outcomes. Although  
52  
53 the studies are challenging to summarise given the heterogeneity, the data are ample and  
54  
55 clinically acceptable and therefore likely to be correct. Meta-analysis was performed with  
56  
57 data from only 10 studies. The data from 16 studies, including those with large sample sizes,  
58  
59  
60

1  
2 therefore did not contribute to full data analysis. If a uniform Multimorbidity Measure were  
3  
4 agreed and established in guidelines, the comparability and synthesis of data in future would  
5  
6 be improved. The evaluation of the effects of types of LTCs on outcomes was limited  
7  
8 because only two studies examined this issue. A key focus of research should therefore be  
9  
10 what patterns of multimorbidity or disease clusters exist in groups of patients with CKD.  
11  
12

13  
14 In conclusion, this review provides evidence of associations between multimorbidity and  
15  
16 heightened risk of adverse clinical outcomes in patients with CKD. Our findings emphasise  
17  
18 the need for further research into the details of how multimorbidity influences different  
19  
20 outcomes. In particular, evidence gaps exist for patients with mild to moderate CKD, for  
21  
22 outcomes other than mortality such as renal progression and cardiovascular events, for  
23  
24 patients with CKD from low and middle income countries and for the patterns of  
25  
26 multimorbidity that contribute to heightened risk.  
27  
28  
29  
30  
31  
32  
33  
34  
35  
36  
37  
38  
39  
40  
41  
42  
43  
44  
45  
46  
47  
48  
49  
50  
51  
52  
53  
54  
55  
56  
57  
58  
59  
60

## Acknowledgements

We thank Paul Cannon of the University of Glasgow Library for assistance with the literature search.

## Funding

This research received no specific grant from any funding agency in the public, commercial or not-for-profit sectors

## Conflicts of Interest

The results presented in this paper have not been published previously in whole or part.

Michael Sullivan, Alastair Rankin, Bhautesh Dinesh Jani and Frances S. Mair have no conflicts of interest. Patrick B. Mark reports personal fees and non-financial support from Vifor, personal fees from Astrazeneca, grants from Boehringer Ingelheim, personal fees and non-financial support from Pharmacosmos, personal fees from Janssen, personal fees from Novartis, personal fees from Pfizer, personal fees from Bristol Myers Squibb, personal fees and non-financial support from Napp, outside the submitted work.

## Author Contributions

Michael Sullivan, Alastair Rankin, Bhautesh Dinesh Jani, Frances S. Mair and Patrick B. Mark contributed to conceptualisation, appraisal of results, writing (review and editing) and manuscript approval. Michael Sullivan, Alastair Rankin and Patrick B. Mark performed data analysis. Michael Sullivan and Alastair Rankin performed data extraction. Michael Sullivan prepared the original manuscript draft.

## Word Count

3739 words.

## Figure Legends

Figure 1. PRISMA flow diagram

Figure 2. Mortality risk for each increase in Charlson Comorbidity Index (Generic Inverse Variance Method, Fixed Effects Model)

Figure 3. Mortality risk for patients with multimorbidity (Mantel-Haenszel Method, Fixed Effects Model)

## Data availability statement

All relevant data are included in the article or uploaded as supplementary information.

## Tables

| Reference                      | Country     | Setting | Sample size | Average follow-up (months) | Outcome(s) |                   |
|--------------------------------|-------------|---------|-------------|----------------------------|------------|-------------------|
|                                |             |         |             |                            | Mortality  | Others            |
| <b>DIALYSIS</b>                |             |         |             |                            |            |                   |
| <b>Beddhu 2000</b>             | USA         | HD/PD   | 268         | 13.1                       | ✓          | Hospitalisation   |
| <b>Chae 2010</b>               | South Korea | HD      | 456         | 40.6                       | ✓          |                   |
| <b>Chandna 1999</b>            | UK          | HD/PD   | 292         | 63                         | ✓          | Hospitalisation   |
| <b>Chandna 2010</b>            | UK          | CC/RRT  | 844         | 58.7*                      | ✓          |                   |
| <b>Davies 1995</b>             | UK          | PD      | 97          | 30                         | ✓          |                   |
| <b>Davies 2002</b>             | UK          | PD      | 303         | 72.0*                      | ✓          |                   |
| <b>Di Iorio 2004</b>           | Italy       | HD      | 515         | 15                         | ✓          |                   |
| <b>Fried 2001</b>              | USA         | PD      | 268         | 16.9                       | ✓          |                   |
| <b>Hemmelgarn 2003</b>         | Canada      | HD/PD   | 237         | 26.3                       | ✓          |                   |
| <b>Park 2015</b>               | South Korea | HD      | 24738       | 47.7                       | ✓          |                   |
| <b>Rattanasompattikul 2012</b> | USA         | HD      | 893         | 72                         | ✓          |                   |
| <b>Shum 2013</b>               | China       | PD/CC   | 157         | 23.5                       | ✓          | Hospitalisation   |
| <b>van Manen 2002</b>          | Netherlands | HD/PD   | 589         | NK                         | ✓          |                   |
| <b>Wu 2013</b>                 | Taiwan      | HD/PD   | 79645       | NK                         | ✓          |                   |
| <b>NON-RRT CKD</b>             |             |         |             |                            |            |                   |
| <b>Bowling 2016</b>            | USA         | CKD 3-5 | 821334      | 81.6                       | ✓          |                   |
| <b>Fraser 2015</b>             | UK          | CKD 3   | 1741        | 43.2                       | ✓          |                   |
| <b>Lee 2018</b>                | Taiwan      | CKD 3-5 | 1463        | 76.7                       | ✓          | Renal progression |

|                          |         |                   |        |       |   |                                               |
|--------------------------|---------|-------------------|--------|-------|---|-----------------------------------------------|
| <b>Lhotta 2003</b>       | Austria | CKD 5             | 75     | 48    | ✓ |                                               |
| <b>Ritchie 2009</b>      | USA     | CKD/Heart failure | 1974   | 32.6  | ✓ | Hospitalisation, HF hospitalisation, CV death |
| <b>Tonelli 2015</b>      | Canada  | CKD 3-5           | 530771 | 48    | ✓ | Hospitalisation, Myocardial Infarction        |
| <b>TRANSPLANT</b>        |         |                   |        |       |   |                                               |
| <b>Fernandez 2019</b>    | USA     | Tx assessment     | 2086   | NK    | ✓ |                                               |
| <b>Grosso 2012</b>       | Italy   | Tx recipients     | 223    | NK    | ✓ | Renal Progression                             |
| <b>Pieloch 2015</b>      | USA     | Tx recipients     | 100261 | 36    | ✓ | Renal Progression                             |
| <b>Wu 2005</b>           | USA     | Tx recipients     | 715    | 40.2  | ✓ | Renal Progression                             |
| <b>CONSERVATIVE CARE</b> |         |                   |        |       |   |                                               |
| <b>Ellam 2008</b>        | UK      | CC                | 69     | 21*   | ✓ |                                               |
| <b>Wong 2007</b>         | UK      | CC                | 73     | 23.4* | ✓ |                                               |

Table 1. Study characteristics. HD, haemodialysis; PD, peritoneal dialysis; CKD, chronic kidney disease; RRT, renal replacement therapy; CC, conservative care; Tx, transplant; NK, Not Known. \*Median survival

| Variable Type | Multimorbidity Measure: number of studies |                 |     |      |                                                              |
|---------------|-------------------------------------------|-----------------|-----|------|--------------------------------------------------------------|
|               | CCI                                       | Condition Count | CSS | KTMI | Heart failure and CKD versus Heart failure, CKD and diabetes |
| Categorical   | 6                                         | 4               | 1   | 1    | 1                                                            |
| Continuous    | 6                                         | 4               | 1   | 0    | 0                                                            |

Table 2. Studies using each Multimorbidity measure. CCI, Charlson Comorbidity Index; CSS, Comorbidity Severity Score; KTMI, Kidney Transplant Morbidity Index.

## References

- 1 Multimorbidity: clinical assessment and management: National Institute for Health and Care Excellence (NICE); 2017. 23 p.
- 2 Barnett, K., S. W. Mercer, M. Norbury, et al. (2012). "Epidemiology of multimorbidity and implications for health care, research, and medical education: a cross-sectional study." *The Lancet* **380**(9836): 37-43.
- 3 Harris, M. F., S. Dennis and M. Pillay (2013). "Multimorbidity: negotiating priorities and making progress." *Aust Fam Physician* **42**(12): 850-854.
- 4 Tinetti, M. E., T. R. Fried and C. M. Boyd (2012). "Designing health care for the most common chronic condition--multimorbidity." *Jama* **307**(23): 2493-2494.
- 5 Mair, F. S. and C. R. May (2014). "Thinking about the burden of treatment." *Bmj* **349**: g6680.
- 6 Tonelli, M., N. Wiebe, B. J. Manns, et al. (2018). "Comparison of the Complexity of Patients Seen by Different Medical Subspecialists in a Universal Health Care System." *JAMA Netw Open* **1**(7): e184852.
- 7 Coresh, J. (2017). "Update on the Burden of CKD." **28**(4): 1020-1022, *ibid*.
- 8 Kassebaum, N. J., M. Arora, R. M. Barber, et al. (2016). "Global, regional, and national disability-adjusted life-years (DALYs) for 315 diseases and injuries and healthy life expectancy (HALE), 1990-2015: a systematic analysis for the Global Burden of Disease Study 2015." *The Lancet* **388**(10053): 1603-1658.
- 9 van der Velde, M., K. Matsushita, J. Coresh, et al. (2011). "Lower estimated glomerular filtration rate and higher albuminuria are associated with all-cause and cardiovascular mortality. A collaborative meta-analysis of high-risk population cohorts." *Kidney Int* **79**(12): 1341-1352.
- 10 Matsushita, K., J. Coresh, Y. Sang, et al. (2015). "Estimated glomerular filtration rate and albuminuria for prediction of cardiovascular outcomes: a collaborative meta-analysis of individual participant data." *Lancet Diabetes Endocrinol* **3**(7): 514-525.
- 11 Fraser, S. D. and M. W. Taal (2016). "Multimorbidity in people with chronic kidney disease: implications for outcomes and treatment." *Curr Opin Nephrol Hypertens* **25**(6): 465-472.
- 12 Shamseer, L., D. Moher, M. Clarke, et al. (2015). "Preferred reporting items for systematic review and meta-analysis protocols (PRISMA-P) 2015: elaboration and explanation." **349**: g7647.
- 13 Cumpston, M., T. Li, M. J. Page, et al. (2019). "Updated guidance for trusted systematic reviews: a new edition of the Cochrane Handbook for Systematic Reviews of Interventions." *Cochrane Database Syst Rev* **10**: Ed000142.
- 14 Nunes BP, Flores TR, Mielke GI, Thumé E, Facchini LA. Multimorbidity and mortality in older adults: A systematic review and meta-analysis. *Arch Gerontol Geriatr*. 2016;67:130-138
- 15 Beddhu, S., F. J. Bruns, M. Saul, P. Seddon and M. L. Zeidel (2000). "A simple comorbidity scale predicts clinical outcomes and costs in dialysis patients." *Am J Med* **108**(8): 609-613.
- 16 Bowling, C. B., L. Plantinga, L. S. Phillips, et al. (2017). "Association of Multimorbidity with Mortality and Healthcare Utilization in Chronic Kidney Disease." *J Am Geriatr Soc* **65**(4): 704-711.
- 17 Chae, J. W., C. S. Song, H. Kim, et al. (2011). "Prediction of mortality in patients undergoing maintenance hemodialysis by Charlson Comorbidity Index using ICD-10 database." *Nephron Clin Pract* **117**(4): c379-384.

1  
2  
3  
4  
5  
6  
7  
8  
9  
10  
11  
12  
13  
14  
15  
16  
17  
18  
19  
20  
21  
22  
23  
24  
25  
26  
27  
28  
29  
30  
31  
32  
33  
34  
35  
36  
37  
38  
39  
40  
41  
42  
43  
44  
45  
46  
47  
48  
49  
50  
51  
52  
53  
54  
55  
56  
57  
58  
59  
60

- <sup>18</sup> Chandna, S. M., M. Da Silva-Gane, C. Marshall, et al. (2011). "Survival of elderly patients with stage 5 CKD: comparison of conservative management and renal replacement therapy." *Nephrol Dial Transplant* **26**(5): 1608-1614.
- <sup>19</sup> Chandna, S. M., J. Schulz, C. Lawrence, R. N. Greenwood and K. Farrington (1999). "Is there a rationale for rationing chronic dialysis? A hospital based cohort study of factors affecting survival and morbidity." *Bmj* **318**(7178): 217-223.
- <sup>20</sup> Davies, S. J., L. Phillips, P. F. Naish and G. I. Russell (2002). "Quantifying comorbidity in peritoneal dialysis patients and its relationship to other predictors of survival." *Nephrol Dial Transplant* **17**(6): 1085-1092.
- <sup>21</sup> Davies, S. J., L. Russell, J. Bryan, L. Phillips and G. I. Russell (1995). "Comorbidity, urea kinetics, and appetite in continuous ambulatory peritoneal dialysis patients: their interrelationship and prediction of survival." *Am J Kidney Dis* **26**(2): 353-361.
- <sup>22</sup> Di Iorio, B., N. Cillo, M. Cirillo and N. G. De Santo (2004). "Charlson Comorbidity Index is a predictor of outcomes in incident hemodialysis patients and correlates with phase angle and hospitalization." *Int J Artif Organs* **27**(4): 330-336.
- <sup>23</sup> Ellam, T., M. El-Kossi, K. C. Prasanth, M. El-Nahas and A. Khwaja (2009). "Conservatively managed patients with stage 5 chronic kidney disease--outcomes from a single center experience." *Qjm* **102**(8): 547-554.
- <sup>24</sup> Fraser, S. D., P. J. Roderick, C. R. May, et al. (2015). "The burden of comorbidity in people with chronic kidney disease stage 3: a cohort study." *BMC Nephrol* **16**: 193.
- <sup>25</sup> Fried, L., J. Bernardini and B. Piraino (2001). "Charlson comorbidity index as a predictor of outcomes in incident peritoneal dialysis patients." *Am J Kidney Dis* **37**(2): 337-342.
- <sup>26</sup> Grosso, G., D. Corona, A. Mistretta, et al. (2012). "Predictive value of the Charlson comorbidity index in kidney transplantation." *Transplant Proc* **44**(7): 1859-1863.
- <sup>27</sup> Hemmelgarn, B. R., B. J. Manns, H. Quan and W. A. Ghali (2003). "Adapting the Charlson Comorbidity Index for use in patients with ESRD." *Am J Kidney Dis* **42**(1): 125-132.
- <sup>28</sup> Lee, W. C., Y. T. Lee, L. C. Li, et al. (2018). "The Number of Comorbidities Predicts Renal Outcomes in Patients with Stage 3(-)5 Chronic Kidney Disease." *J Clin Med* **7**(12).
- <sup>29</sup> Lhotta, K., M. Zobl, G. Mayer and F. Kronenberg (2003). "Late referral defined by renal function: association with morbidity and mortality." *J Nephrol* **16**(6): 855-861.
- <sup>30</sup> Park, J. Y., M. H. Kim, S. S. Han, et al. (2015). "Recalibration and validation of the Charlson comorbidity index in Korean incident hemodialysis patients." *PLoS One* **10**(5): e0127240.
- <sup>31</sup> Perez Fernandez, M., P. Martinez Miguel, H. Ying, et al. (2019). "Comorbidity, Frailty, and Waitlist Mortality among Kidney Transplant Candidates of All Ages." *Am J Nephrol* **49**(2): 103-110.
- <sup>32</sup> Pieloch, D., V. Dombrovskiy, A. J. Osband, et al. (2015). "The Kidney Transplant Morbidity Index (KTMI): a simple prognostic tool to help determine outcome risk in kidney transplant candidates." *Prog Transplant* **25**(1): 70-76.
- <sup>33</sup> Rattanasompattikul, M., U. Feroze, M. Z. Molnar, et al. (2012). "Charlson comorbidity score is a strong predictor of mortality in hemodialysis patients." *Int Urol Nephrol* **44**(6): 1813-1823.
- <sup>34</sup> Ritchie, C., O. J. Ekundayo, M. Muchimba, et al. (2009). "Effects of diabetes mellitus in patients with heart failure and chronic kidney disease: a propensity-matched study of multimorbidity in chronic heart failure." *Int J Cardiol* **134**(3): 330-335.
- <sup>35</sup> Shum, C. K., K. F. Tam, W. L. Chak, et al. (2014). "Outcomes in older adults with stage 5 chronic kidney disease: comparison of peritoneal dialysis and conservative management." *J Gerontol A Biol Sci Med Sci* **69**(3): 308-314.
- <sup>36</sup> Tonelli, M., N. Wiebe, B. Guthrie, et al. (2015). "Comorbidity as a driver of adverse outcomes in people with chronic kidney disease." *Kidney Int* **88**(4): 859-866.

- 1  
2  
3  
4  
5  
6  
7  
8  
9  
10  
11  
12  
13  
14  
15  
16  
17  
18  
19  
20  
21  
22  
23  
24  
25  
26  
27  
28  
29  
30  
31  
32  
33  
34  
35  
36  
37  
38  
39  
40  
41  
42  
43  
44  
45  
46  
47  
48  
49  
50  
51  
52  
53  
54  
55  
56  
57  
58  
59  
60
- <sup>37</sup> van Manen, J. G., J. C. Korevaar, F. W. Dekker, et al. (2002). "How to adjust for comorbidity in survival studies in ESRD patients: a comparison of different indices." *Am J Kidney Dis* **40**(1): 82-89.
- <sup>38</sup> Wong, C. F., M. McCarthy, M. L. Howse and P. S. Williams (2007). "Factors affecting survival in advanced chronic kidney disease patients who choose not to receive dialysis." *Ren Fail* **29**(6): 653-659.
- <sup>39</sup> Wu, C., I. Evans, R. Joseph, et al. (2005). "Comorbid conditions in kidney transplantation: association with graft and patient survival." *J Am Soc Nephrol* **16**(11): 3437-3444.
- <sup>40</sup> Wu, P. H., Y. T. Lin, T. C. Lee, et al. (2013). "Predicting mortality of incident dialysis patients in Taiwan--a longitudinal population-based study." *PLoS One* **8**(4): e61930.
- <sup>41</sup> AHRQ Customer Service Standards. October 2018. Agency for Healthcare Research and Quality, Rockville, MD. <https://www.ahrq.gov/contact/standards.html>
- <sup>42</sup> Whitty, C. J. M., C. MacEwen, A. Goddard, et al. (2020). "Rising to the challenge of multimorbidity." *BMJ* **368**: l6964.
- <sup>43</sup> Jani, B. D., P. Hanlon, B. I. Nicholl, et al. (2019). "Relationship between multimorbidity, demographic factors and mortality: findings from the UK Biobank cohort." *BMC Medicine* **17**(1): 74.
- <sup>44</sup> Evangelidis, N., A. Tong, B. Manns, et al. (2017). "Developing a Set of Core Outcomes for Trials in Hemodialysis: An International Delphi Survey." *Am J Kidney Dis* **70**(4): 464-475.
- <sup>45</sup> Tong, A., B. Manns, B. Hemmelgarn, et al. (2017). "Establishing Core Outcome Domains in Hemodialysis: Report of the Standardized Outcomes in Nephrology–Hemodialysis (SONG-HD) Consensus Workshop." *Am J Kidney Dis*. **69**(1): 97–107.
- <sup>46</sup> Coresh, J., E. Selvin, L. A. Stevens, et al. (2007). "Prevalence of chronic kidney disease in the United States." *Jama* **298**(17): 2038-2047.
- <sup>47</sup> Stirland, L. E., L. González-Saavedra, D. S. Mullin, et al. (2020). "Measuring multimorbidity beyond counting diseases: systematic review of community and population studies and guide to index choice." *368*: m160.
- <sup>48</sup> Konstantinidis, I., G. N. Nadkarni, R. Yacoub, et al. (2016). "Representation of Patients With Kidney Disease in Trials of Cardiovascular Interventions: An Updated Systematic Review." *JAMA Intern Med* **176**(1): 121-124.
- <sup>49</sup> Smyth, B., A. Haber, K. Trongtrakul, et al. (2019). "Representativeness of Randomized Clinical Trial Cohorts in End-stage Kidney Disease: A Meta-analysis." *Ibid*.
- <sup>50</sup> Strippoli, G. F., J. C. Craig and F. P. Schena (2004). "The number, quality, and coverage of randomized controlled trials in nephrology." *J Am Soc Nephrol* **15**(2): 411-419.
- <sup>51</sup> Hanlon, P., L. Hannigan, J. Rodriguez-Perez, et al. (2019). "Representation of people with comorbidity and multimorbidity in clinical trials of novel drug therapies: an individual-level participant data analysis." *BMC Medicine* **17**(1): 201.



1  
2  
3  
4  
5  
6  
7  
8  
9  
10  
11  
12  
13  
14  
15  
16  
17  
18  
19  
20  
21  
22  
23  
24  
25  
26  
27  
28  
29  
30  
31  
32  
33  
34  
35  
36  
37  
38  
39  
40  
41  
42  
43  
44  
45  
46  
47  
48  
49  
50  
51  
52  
53  
54  
55  
56  
57  
58  
59  
60

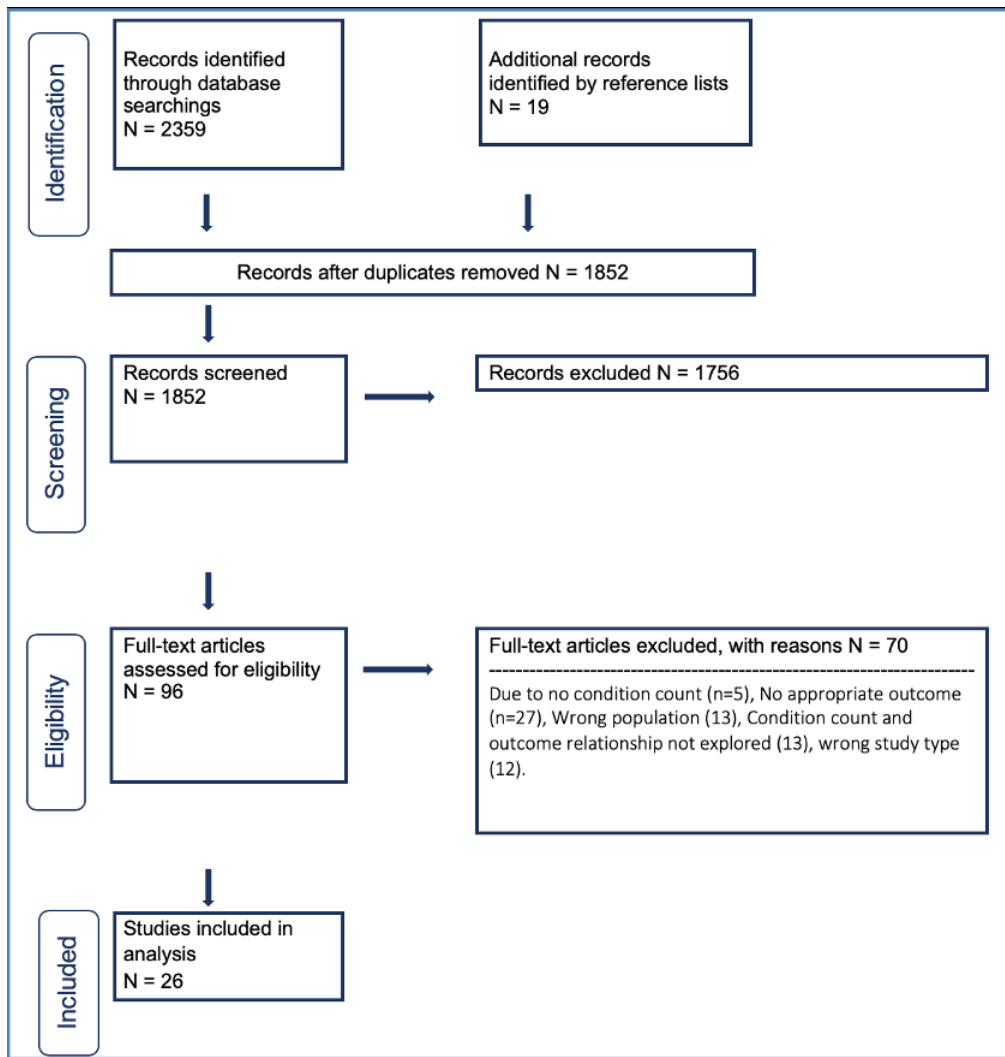

PRISMA flow diagram

1  
2  
3  
4  
5  
6  
7  
8  
9  
10  
11  
12  
13  
14  
15  
16  
17  
18  
19  
20  
21  
22  
23  
24  
25  
26  
27  
28  
29  
30  
31  
32  
33  
34  
35  
36  
37  
38  
39  
40  
41  
42  
43  
44  
45  
46  
47  
48  
49  
50  
51  
52  
53  
54  
55  
56  
57  
58  
59  
60

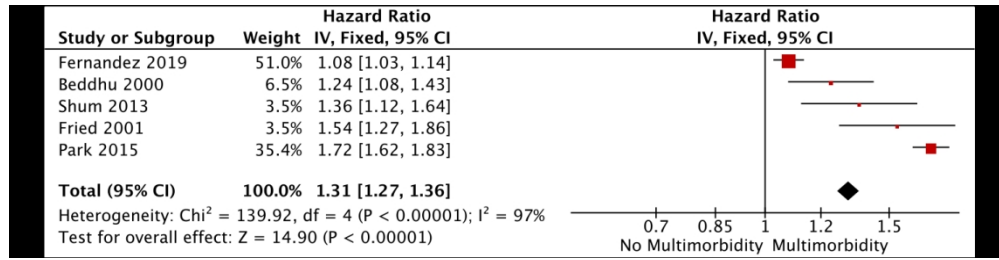

Mortality risk for Charlson Comorbidity Index as a continuous variable (Generic Inverse Variance Method, Fixed Effects Model)

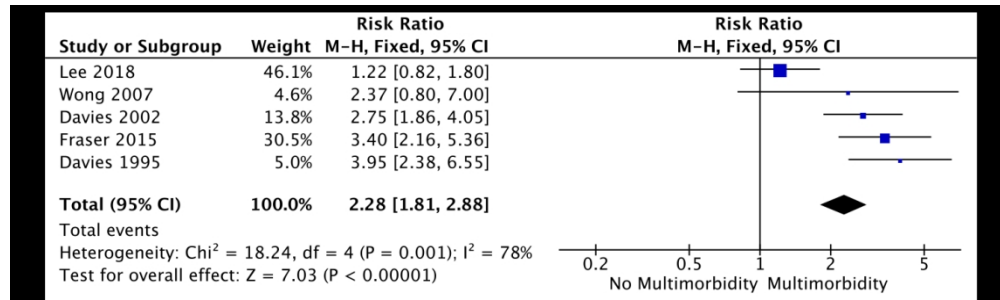

Mortality risk for patients with multimorbidity (Mantel-Haenszel Method, Fixed Effects Model)

1  
2  
3  
4  
5  
6  
7  
8  
9  
10  
11  
12  
13  
14  
15  
16  
17  
18  
19  
20  
21  
22  
23  
24  
25  
26  
27  
28  
29  
30

## Supplementary File 1. Database Search Terms

|                  |                                                                                                                                                                                                                                                                                                                                                                                                                       |                                                                                                                                                                                                                                                                                                                                                     |                               |
|------------------|-----------------------------------------------------------------------------------------------------------------------------------------------------------------------------------------------------------------------------------------------------------------------------------------------------------------------------------------------------------------------------------------------------------------------|-----------------------------------------------------------------------------------------------------------------------------------------------------------------------------------------------------------------------------------------------------------------------------------------------------------------------------------------------------|-------------------------------|
| Subject headings | Chronic Kidney Failure<br>Kidney Failure<br>Chronic Renal Insufficiency<br>Renal Insufficiency<br>Kidney Disease<br>Kidney Dysfunction<br>Mild renal impairment<br>Moderate renal impairment<br>Severe renal impairment<br>Subclinical renal impairment<br>Renal replacement therapy<br>Hemodialysis<br>Peritoneal Dialysis<br>Continuous Ambulatory<br>Peritoneal Dialysis<br>Kidney transplantation<br>Kidney graft | Multimorbidity<br>Multiple Chronic Conditions                                                                                                                                                                                                                                                                                                       | Humans<br>Adult               |
| Textwords        | Chronic kidney or chronic renal<br>CKF, CKD, CRF or CRD<br>Predialysis or pre-dialysis<br>Renal failure or kidney failure<br>Kidney disease<br>Renal insufficiency*<br>Hemodialysis or Haemodialysis<br>Hemodiafiltration or<br>haemodiafiltration<br>Dialysis<br>Endstage renal or endstage<br>kidney<br>Peritoneal dialysis<br>CAPD or APD or CCPD or PD<br>Kidney Transplant                                       | Multimorbid* or multi morbid<br>Condition count<br>Multiple condition or multicondition<br>or multi condition<br>Multiple disease or multidisease or<br>multi disease<br>Multiple disorder or multidisorder or<br>multi disorder<br>Multiple comorbidities or multiple co<br>morbidities<br>Discordant comorbidities or<br>concordant comorbidities | Adult* or aged* or<br>elderly |

## Supplementary File 2. NEWCASTLE - OTTAWA QUALITY ASSESSMENT SCALE

Note: A study can be awarded a maximum of one star for each numbered item within the Selection and Outcome categories. A maximum of two stars can be given for Comparability

### Selection

- 1) Representativeness of the exposed cohort ie chronic kidney disease (CKD) with multimorbidity (MM)
  - a) truly representative of the average CKD/MM population in the community \*
  - b) somewhat representative of the average CKD/MM population in the community \*
  - c) selected group of users eg only one disease group
  - d) no description of the derivation of the cohort
- 2) Selection of the unexposed cohort ie CKD without MM
  - a) drawn from the same community as the exposed cohort \*
  - b) drawn from a different source
  - c) no description of the derivation of the non exposed cohort
  - d) no control group
- 3) Ascertainment of CKD/MM status
  - a) secure record (eg medical records) \*
  - b) structured interview \*
  - c) written self report
  - d) no description
- 4) Demonstration that outcomes were not present at start of study
  - a) yes \*
  - b) no

### Comparability

- 1) Comparability of cohorts on the basis of the design ie are exposed/non-exposed individuals matched or do the authors actively control for confounding factors?
  - a) study controls for ischaemic heart disease \*
  - b) study controls for additional factor(s) \*

Statements of no differences between groups or that differences were not statistically significant are not sufficient for establishing comparability.

### Outcomes

- 1) Assessment of outcome(s)
  - a) independent blind assessment \*
  - b) record linkage \*
  - c) self report
  - d) no description
- 2) Was follow-up long enough ie > 1 year
  - a) yes \*
  - b) no
- 3) Adequacy of follow up of cohorts
  - a) complete follow up - all subjects accounted for \*
  - b) subjects lost to follow up unlikely to introduce bias - small number lost to follow up, or description provided of those lost) \*
  - c) high lost to follow up rate and no description of those lost
  - d) no statement

Total stars /8

## Supplementary File 3. Results from included studies

| Reference                               | Effect size      | CCI groups                                                                                                                        | Effect size (95% Confidence Interval) |
|-----------------------------------------|------------------|-----------------------------------------------------------------------------------------------------------------------------------|---------------------------------------|
| CATEGORICAL PRESENTATION OF EFFECT SIZE |                  |                                                                                                                                   |                                       |
| Chae 2010                               | HRs              | <b>A. Standard CCI variables</b>                                                                                                  |                                       |
|                                         |                  | Quartile 1 (CCI 2)                                                                                                                | Ref                                   |
|                                         |                  | Quartile 2 (CCI 4-5)                                                                                                              | 9.22 (3.29-25.84)                     |
|                                         |                  | Quartile 3 (CCI 6)                                                                                                                | 16.77 (5.97-47.11)                    |
|                                         |                  | Quartile 4 (CCI 7-11)                                                                                                             | 22.37 (8.08-61.93)                    |
|                                         |                  | <b>B. CCI excluding age and diabetes</b>                                                                                          |                                       |
|                                         |                  | Tertile 1 (CCI 2)                                                                                                                 | Ref                                   |
|                                         |                  | Tertile 2 (CCI 3)                                                                                                                 | 1.39 (1.01-2.05)                      |
| Tertile 3 (CCI 4-8)                     | 1.98 (1.25-3.14) |                                                                                                                                   |                                       |
| Wu 2005                                 | HRs              | <b>CCI excluding age</b>                                                                                                          |                                       |
|                                         |                  | CCI < 5                                                                                                                           | Ref                                   |
|                                         |                  | CCI ≥ 5                                                                                                                           | 2.88 (1.90-4.37)                      |
| Grosso 2012                             | HRs              | <b>Modified CCI</b>                                                                                                               |                                       |
|                                         |                  | 1 point: myocardial infarction, heart failure, peripheral vascular disease, COPD, connective tissue disease or mild liver disease |                                       |
|                                         |                  | 2 points: diabetes mellitus, cerebrovascular accident, solid tumour or leukaemia                                                  |                                       |
|                                         |                  | CCI ≤ 1                                                                                                                           | Ref                                   |
|                                         |                  | CCI > 1                                                                                                                           | 3.87 (1.06-14.06)                     |
| Rattanasompattikul 2012                 | HRs              | <b>CCI excluding age and renal disease</b>                                                                                        |                                       |
|                                         |                  | Quartile 1 (CCI 0)                                                                                                                | Ref                                   |
|                                         |                  | Quartile 2 (CCI 1-2)                                                                                                              | 1.72 (1.26-2.36)                      |
|                                         |                  | Quartile 3 (CCI 3)                                                                                                                | 2.60 (1.13-3.26)                      |
|                                         |                  | Quartile 4 (CCI 4-9)                                                                                                              | 3.40 (2.41-4.79)                      |
| Wu 2013                                 | HRs              | <b>CCI excluding age</b>                                                                                                          |                                       |
|                                         |                  | CCI ≤ 3                                                                                                                           | Ref                                   |
|                                         |                  | CCI 4-6                                                                                                                           | 2.49 (2.35-2.63)                      |
|                                         |                  | CCI 7-9                                                                                                                           | 3.53 (3.34-3.73)                      |
|                                         |                  | CCI 10-12                                                                                                                         | 3.66 (3.45-3.88)                      |
|                                         |                  | CCI 13-15                                                                                                                         | 4.12 (3.84-4.42)                      |
|                                         |                  | CCI > 15                                                                                                                          | 4.42 (4.02-4.86)                      |

## CONTINUOUS PRESENTATION OF EFFECT SIZES

|    |                                                         |               |                                                                                                                                                                                                                                                                                                                                                                                                                                                                       |                  |
|----|---------------------------------------------------------|---------------|-----------------------------------------------------------------------------------------------------------------------------------------------------------------------------------------------------------------------------------------------------------------------------------------------------------------------------------------------------------------------------------------------------------------------------------------------------------------------|------------------|
| 1  | Beddhu 2000                                             | HRs           | <b>Modified CCI</b><br>1 point: coronary artery disease, heart failure, peripheral vascular disease, cerebrovascular disease, dementia, chronic pulmonary disease, connective tissue disorder, peptic ulcer disease, mild liver disease, diabetes<br>2 points: hemiplegia, moderate or severe renal disease, diabetes with end-organ damage, any tumour, leukaemia, lymphoma<br>3 points: moderate or severe liver disease<br>6 points: metastatic solid tumour, AIDS |                  |
| 2  |                                                         |               | Each increase in CCI                                                                                                                                                                                                                                                                                                                                                                                                                                                  | 1.24 (1.11-1.39) |
| 3  | Fried 2001                                              | Relative risk | <b>Standard CCI variables</b>                                                                                                                                                                                                                                                                                                                                                                                                                                         |                  |
| 4  |                                                         |               | Each increase in CCI                                                                                                                                                                                                                                                                                                                                                                                                                                                  | 1.54 (1.36-1.74) |
| 5  | Park 2015                                               | HRs           | <b>A. Standard CCI variables</b>                                                                                                                                                                                                                                                                                                                                                                                                                                      |                  |
| 6  |                                                         |               | Each increase in CCI                                                                                                                                                                                                                                                                                                                                                                                                                                                  | 1.42 (1.39-1.45) |
| 7  |                                                         |               | <b>B. Modified CCI in incident haemodialysis patients</b><br>Details not provided                                                                                                                                                                                                                                                                                                                                                                                     |                  |
| 8  |                                                         |               | Each increase in CCI                                                                                                                                                                                                                                                                                                                                                                                                                                                  | 1.72 (1.66-1.78) |
| 9  | Shum 2013                                               | HRs           | <b>ESRD Modified CCI</b>                                                                                                                                                                                                                                                                                                                                                                                                                                              |                  |
| 10 |                                                         |               | Each increase in CCI (PD group only)                                                                                                                                                                                                                                                                                                                                                                                                                                  | 1.36 (1.18-1.56) |
| 11 | CONTINUOUS AND CATEGORICAL PRESENTATION OF EFFECT SIZES |               |                                                                                                                                                                                                                                                                                                                                                                                                                                                                       |                  |
| 12 | Fernandez 2019                                          | HRs           | <b>ESRD Modified CCI</b>                                                                                                                                                                                                                                                                                                                                                                                                                                              |                  |
| 13 |                                                         |               | Each increase in CCI                                                                                                                                                                                                                                                                                                                                                                                                                                                  | 1.08 (1.03-1.13) |
| 14 |                                                         |               | Low comorbidity burden CCI 0-1                                                                                                                                                                                                                                                                                                                                                                                                                                        | Ref              |
| 15 |                                                         |               | High comorbidity burden CCI ≥ 2                                                                                                                                                                                                                                                                                                                                                                                                                                       | 1.38 (1.01-1.89) |

Results from studies using Charlson Comorbidity Index (CCI) as Multimorbidity Measure. HR; hazard ratio. COPD; Chronic Obstructive Pulmonary Disease. AIDS; Acquired Immune Deficiency Syndrome. PD; peritoneal dialysis.

| Reference                               | Effect size | Conditions and groups                                                                                                                                                                                                                                                                                                                                                                                             | Effect size (95% Confidence Interval) |
|-----------------------------------------|-------------|-------------------------------------------------------------------------------------------------------------------------------------------------------------------------------------------------------------------------------------------------------------------------------------------------------------------------------------------------------------------------------------------------------------------|---------------------------------------|
| CATEGORICAL PRESENTATION OF EFFECT SIZE |             |                                                                                                                                                                                                                                                                                                                                                                                                                   |                                       |
| Bowling 2016                            | HRs         | 22 conditions: hypertension, hyperlipidemia, coronary heart disease, atrial fibrillation, heart failure, peripheral arterial disease, arthritis, osteoporosis, gout, diabetes, hypothyroidism, cancer, prostate cancer, anaemia, cerebrovascular disease, depression, dementia, epilepsy, Parkinson's disease, gastroesophageal reflux disease/peptic ulcer disease, benign prostatic hypertrophy and COPD/asthma |                                       |
|                                         |             | 1                                                                                                                                                                                                                                                                                                                                                                                                                 | Ref                                   |
|                                         |             | 2                                                                                                                                                                                                                                                                                                                                                                                                                 | 0.95 (0.93-0.97)                      |
|                                         |             | 3                                                                                                                                                                                                                                                                                                                                                                                                                 | 1.03 (1.01-1.05)                      |
|                                         |             | 4                                                                                                                                                                                                                                                                                                                                                                                                                 | 1.24 (1.21-1.26)                      |
|                                         |             | 5                                                                                                                                                                                                                                                                                                                                                                                                                 | 1.43 (1.39-1.47)                      |
|                                         |             | ≥ 6                                                                                                                                                                                                                                                                                                                                                                                                               | 1.72 (1.64-1.80)                      |

|                                         |                        |                                                                                                                                                                                                                                                                                                                                                                                                                                                                                                                                                  |                                                   |
|-----------------------------------------|------------------------|--------------------------------------------------------------------------------------------------------------------------------------------------------------------------------------------------------------------------------------------------------------------------------------------------------------------------------------------------------------------------------------------------------------------------------------------------------------------------------------------------------------------------------------------------|---------------------------------------------------|
| Fraser<br>2015                          | HRs                    | 11 conditions: hypertension, diabetes, ischaemic heart disease, heart failure, peripheral vascular disease, cerebrovascular disease, chronic respiratory disorder, depression, chronic painful condition, thyroid disorder and anaemia                                                                                                                                                                                                                                                                                                           |                                                   |
|                                         |                        | 0-1                                                                                                                                                                                                                                                                                                                                                                                                                                                                                                                                              | Ref                                               |
|                                         |                        | 2                                                                                                                                                                                                                                                                                                                                                                                                                                                                                                                                                | 2.31 (1.36-3.94)                                  |
|                                         |                        | ≥ 3                                                                                                                                                                                                                                                                                                                                                                                                                                                                                                                                              | 4.58 (2.85-7.38)                                  |
| Lee 2018                                | 10-year survival rates | 12 conditions: diabetes, hypertension, gout, heart failure, ischemic heart disease, cerebrovascular disease, liver disease, malignancy, tuberculosis, hyperlipidaemia, anaemia and connective tissue disease                                                                                                                                                                                                                                                                                                                                     |                                                   |
|                                         |                        | 0                                                                                                                                                                                                                                                                                                                                                                                                                                                                                                                                                | 93.7%                                             |
|                                         |                        | 1                                                                                                                                                                                                                                                                                                                                                                                                                                                                                                                                                | 94.3%                                             |
|                                         |                        | 2                                                                                                                                                                                                                                                                                                                                                                                                                                                                                                                                                | 92.9%                                             |
| Tonelli<br>2015                         | HRs                    | 29 conditions: alcohol misuse, asthma, atrial fibrillation, lymphoma, non-metastatic cancer, metastatic cancer, heart failure, chronic pain, COPD, chronic hepatitis B, cirrhosis, severe constipation, dementia, depression, diabetes, epilepsy, hypertension, hypothyroidism, inflammatory bowel disease, irritable bowel syndrome, multiple sclerosis, myocardial infarction, Parkinson's disease, peptic ulcer disease, peripheral vascular disease, psoriasis, rheumatoid arthritis, schizophrenia, and stroke or transient ischemic attack |                                                   |
|                                         |                        | 0                                                                                                                                                                                                                                                                                                                                                                                                                                                                                                                                                | Ref                                               |
|                                         |                        | 1                                                                                                                                                                                                                                                                                                                                                                                                                                                                                                                                                | 1.57 (1.50-1.63)                                  |
|                                         |                        | 2                                                                                                                                                                                                                                                                                                                                                                                                                                                                                                                                                | 2.34 (2.24-2.44)                                  |
|                                         |                        | 3                                                                                                                                                                                                                                                                                                                                                                                                                                                                                                                                                | 3.43 (3.29-3.58)                                  |
|                                         |                        | 4                                                                                                                                                                                                                                                                                                                                                                                                                                                                                                                                                | 4.81 (4.60-5.02)                                  |
| ≥ 5                                     | 7.74 (7.43-8.07)       |                                                                                                                                                                                                                                                                                                                                                                                                                                                                                                                                                  |                                                   |
| CONTINUOUS PRESENTATION OF EFFECT SIZES |                        |                                                                                                                                                                                                                                                                                                                                                                                                                                                                                                                                                  |                                                   |
| Davies<br>1995                          | HRs                    | <b>Development of the Stoke Comorbidity Grade</b>                                                                                                                                                                                                                                                                                                                                                                                                                                                                                                |                                                   |
|                                         |                        | 11 conditions: ischaemic heart disease, peripheral vascular disease, cerebrovascular disease, left ventricular dysfunction, diabetes mellitus, systemic collagen vascular disease, COPD, pulmonary fibrosis, pulmonary tuberculosis, asthma and cirrhosis                                                                                                                                                                                                                                                                                        |                                                   |
|                                         |                        | Low grade: 0 conditions<br>Intermediate grade: 1-2 conditions<br>High grade: ≥ 3 conditions                                                                                                                                                                                                                                                                                                                                                                                                                                                      |                                                   |
|                                         |                        | Each increase in grade                                                                                                                                                                                                                                                                                                                                                                                                                                                                                                                           | 2.66 (1.55-4.55)                                  |
| Davies<br>2002                          | Relative risk          | <b>Stoke Comorbidity Grade</b>                                                                                                                                                                                                                                                                                                                                                                                                                                                                                                                   |                                                   |
|                                         |                        | Each increase in grade                                                                                                                                                                                                                                                                                                                                                                                                                                                                                                                           | 2.4 (1.4-4.1)                                     |
| Ellam 2008                              | Narrative              | <b>Stoke Comorbidity Grade</b>                                                                                                                                                                                                                                                                                                                                                                                                                                                                                                                   | "No statistically significant effect on survival" |
| Wong<br>2007                            | HRs                    | <b>Stoke Comorbidity Grade</b>                                                                                                                                                                                                                                                                                                                                                                                                                                                                                                                   |                                                   |
|                                         |                        | Each increase in grade                                                                                                                                                                                                                                                                                                                                                                                                                                                                                                                           | 2.53 (1.32-4.83)                                  |
| Lhotta<br>2003                          | HRs                    | Five conditions: diabetes, heart failure, coronary artery disease, cerebrovascular disease and peripheral vascular disease                                                                                                                                                                                                                                                                                                                                                                                                                       |                                                   |
|                                         |                        | Each increase in comorbidity score                                                                                                                                                                                                                                                                                                                                                                                                                                                                                                               | 1.78 (1.32-2.40)                                  |

Results from studies using Condition Count as Multimorbidity Measure. COPD; chronic obstructive pulmonary disease. HR; hazard ratio.



| Reference    | Effect size measure | Multimorbidity measure and groups                                                                                                                                                                                                                                                   | Effect size (95% Confidence Interval)                                                                                                                |
|--------------|---------------------|-------------------------------------------------------------------------------------------------------------------------------------------------------------------------------------------------------------------------------------------------------------------------------------|------------------------------------------------------------------------------------------------------------------------------------------------------|
| Chandna 1999 | HRs                 | <b>Comorbidity severity score (CSS)</b><br>Cardiac score, according to New York Heart Association, respiratory disease score (1-4), cerebrovascular disease score (1-4), peripheral vascular disease score (1-4), cirrhosis (4), and malignancy score (1-4)<br>Each increase in CSS | 1.238 (1.145-1.338)                                                                                                                                  |
| Chandna 2010 | HRs                 | <b>Comorbidity severity score</b><br>Low comorbidity (CSS ≤ 4)<br>High comorbidity (CSS > 4)                                                                                                                                                                                        | Ref<br>1.823 (1.255-2.650)                                                                                                                           |
| Pieloch 2015 | HRs                 | <b>Kidney Transplant Morbidity Index</b><br>0<br>1<br>2<br>3<br>4<br>5<br>6<br>≥ 7                                                                                                                                                                                                  | Ref<br>1.85 (1.45-2.36)<br>3.11 (2.46-3.94)<br>5.00 (3.96-6.31)<br>7.37 (5.83-9.32)<br>9.41 (7.41-11.94)<br>12.15 (9.45-15.63)<br>13.03 (9.68-17.54) |
| Ritchie 2009 | HRs                 | <b>Heart failure, CKD and diabetes</b><br>Heart failure and CKD<br>Heart failure, CKD and diabetes                                                                                                                                                                                  | Ref<br>1.25 (1.07-1.46)                                                                                                                              |

Results from studies using other Multimorbidity Measures. HR; hazard ratio. CKD; chronic kidney disease.

| Reference       | Scores studied                                                  | Presentation of effect size |
|-----------------|-----------------------------------------------------------------|-----------------------------|
| Hemmelgarn 2003 | CCI<br>Development of ESRD modified CCI                         | Kaplan-Meier curves         |
| Di Iorio 2004   | CCI<br>Development of CCI modified for haemodialysis patients   | Relative risk, 5.5 for CCI  |
| van Manen 2002  | CCI<br>Khan index<br>Davies index<br>Development of a new index | Kaplan-Meier curves         |

Studies that analyse different Multimorbidity Measures. CCI; Charlson Comorbidity Index

Supplementary File 4. Meta-analysis with random effects models

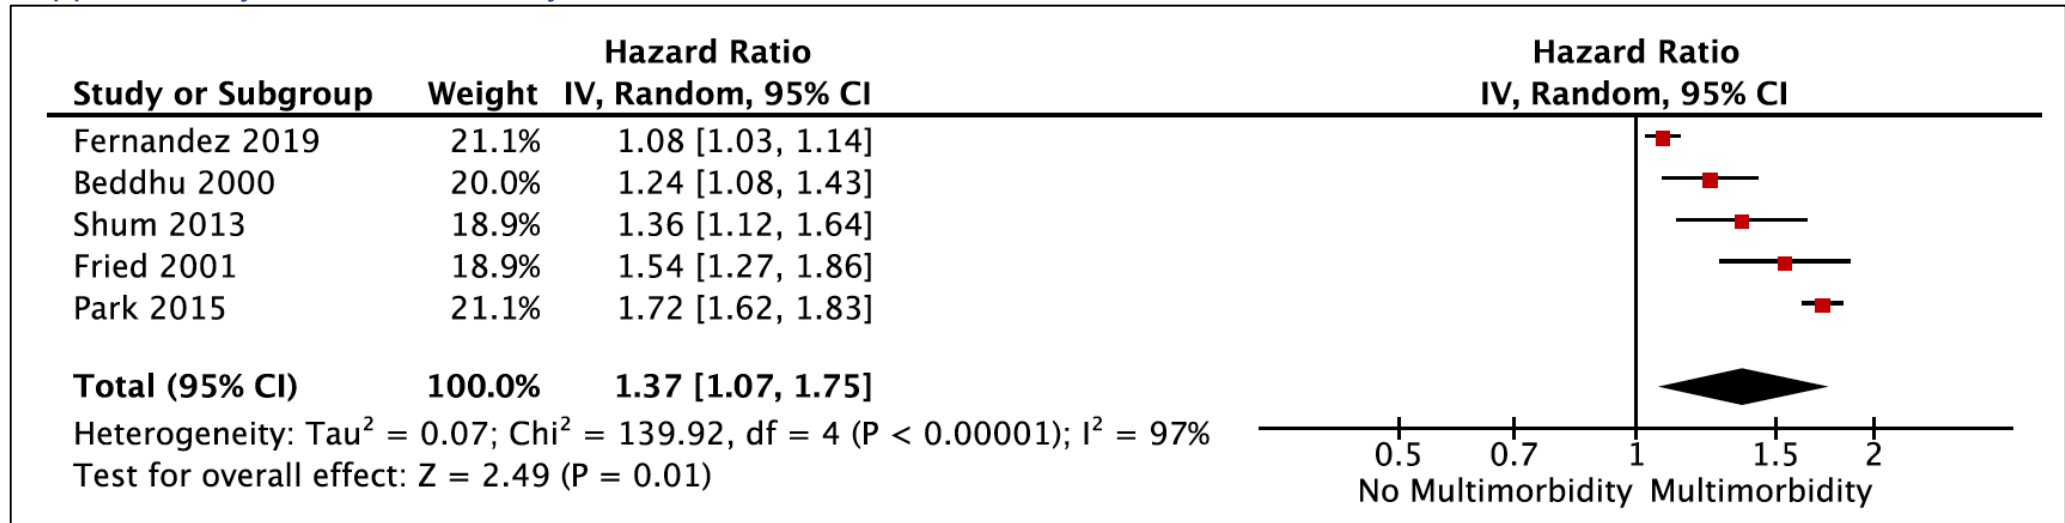

Mortality risk for Charlson Comorbidity Index as a continuous variable (Random Effects Model)

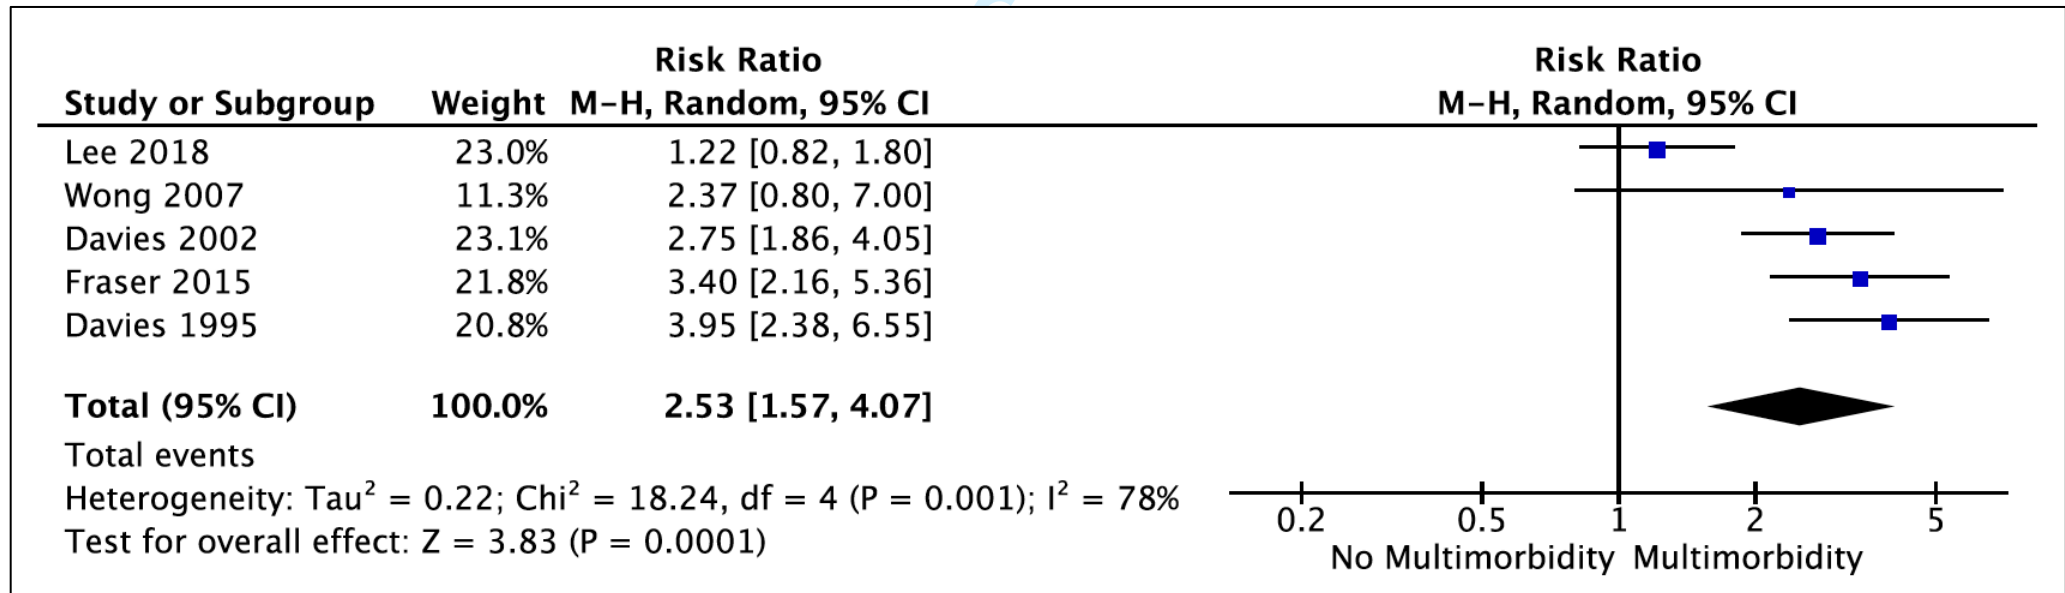

Mortality risk for patients with multimorbidity (Random Effects Model)

Supplementary File 5. Risk of bias: Results from Newcastle Ottawa Scale

| Reference               | Selection |   |   |   | Comparability | Outcome assessment |   |   | Quality score |
|-------------------------|-----------|---|---|---|---------------|--------------------|---|---|---------------|
|                         | 1         | 2 | 3 | 4 |               | 5                  | 6 | 7 |               |
| Beddhu 2000             |           | * | * | * | *             | *                  | * | * | 6             |
| Bowling 2016            | *         | * | * | * | *             | *                  | * | * | 7             |
| Chae 2010               |           | * | * | * | *             | *                  | * | * | 6             |
| Chandna 1999            |           | * | * | * | *             | *                  | * | * | 6             |
| Chandna 2010            |           | * | * | * |               | *                  | * |   | 5             |
| Davies 1995             |           | * | * | * | *             | *                  | * | * | 6             |
| Davies 2002             |           | * | * | * | *             | *                  | * | * | 6             |
| Di Iorio 2004           |           | * | * | * | *             | *                  | * | * | 6             |
| Ellam 2008              |           | * | * | * |               | *                  | * |   | 5             |
| Fernandez 2019          |           | * | * | * | *             | *                  | * | * | 6             |
| Fraser 2015             |           | * | * | * | *             | *                  | * | * | 6             |
| Fried 2001              |           | * | * | * | *             | *                  | * | * | 6             |
| Grosso 2012             |           | * | * | * | *             | *                  | * | * | 6             |
| Hemmelgarn 2003         |           | * | * | * | *             | *                  | * | * | 7             |
| Lee 2018                | *         | * | * | * | *             | *                  | * | * | 7             |
| Lhotta 2003             |           | * | * | * | *             | *                  | * | * | 6             |
| Park 2015               |           | * | * | * | *             | *                  | * | * | 6             |
| Pieloch 2015            |           | * | * | * | *             | *                  | * | * | 6             |
| Rattanasompattikul 2012 |           | * | * | * | *             | *                  | * | * | 6             |
| Ritchie 2009            |           | * | * | * | *             | *                  | * | * | 6             |
| Shum 2013               |           | * | * | * | *             | *                  | * | * | 6             |
| Tonelli 2015            | *         | * | * | * | *             | *                  | * | * | 7             |
| van Manen 2002          |           | * | * | * | *             | *                  | * | * | 6             |
| Wong 2007               |           | * | * | * | *             | *                  | * | * | 6             |
| Wu 2005                 |           | * | * | * | *             | *                  | * | * | 6             |
| Wu 2013                 |           | * | * | * | *             | *                  | * | * | 6             |

Table 3. Newcastle Ottawa Scale. 1. Representativeness of the exposed cohort. 2. Selection of the non-exposed cohort. 3. Ascertainment of chronic kidney disease/multimorbidity status. 4. Demonstration that outcomes were not present at start of study. 5. Comparability of cohorts on the basis of the design. 6. Assessment of outcome(s). 7. Was follow-up long enough. 8. Adequacy of follow up of cohort.

# Reporting checklist for meta-analysis of observational studies.

Based on the MOOSE guidelines.

## Instructions to authors

Complete this checklist by entering the page numbers from your manuscript where readers will find each of the items listed below.

Your article may not currently address all the items on the checklist. Please modify your text to include the missing information. If you are certain that an item does not apply, please write "n/a" and provide a short explanation.

Upload your completed checklist as an extra file when you submit to a journal.

In your methods section, say that you used the MOOSE reporting guidelines, and cite them as:

Stroup DF, Berlin JA, Morton SC, Olkin I, Williamson GD, Rennie D, Moher D, Becker BJ, Sipe TA, Thacker SB. Meta-analysis of observational studies in epidemiology: a proposal for reporting. Meta-analysis Of Observational Studies in Epidemiology (MOOSE) group. JAMA. 2000; 283(15):2008-2012.

|                   | Reporting Item                                                                                                                                                                                                                                                                                                                                        | Page Number |
|-------------------|-------------------------------------------------------------------------------------------------------------------------------------------------------------------------------------------------------------------------------------------------------------------------------------------------------------------------------------------------------|-------------|
| <b>Title</b>      |                                                                                                                                                                                                                                                                                                                                                       |             |
|                   | <a href="#">#1</a> Identify the study as a meta-analysis of observational research                                                                                                                                                                                                                                                                    | 1           |
| <b>Abstract</b>   |                                                                                                                                                                                                                                                                                                                                                       |             |
|                   | <a href="#">#2</a> Provide a structured summary including, as applicable: background; objectives; data sources; study eligibility criteria, participants, and interventions; study appraisal and synthesis methods; results; limitations; conclusions and implications of key findings; systematic review registration number (From PRISMA checklist) | 2, 3        |
| <b>Background</b> |                                                                                                                                                                                                                                                                                                                                                       |             |
|                   | <a href="#">#3a</a> Problem definition                                                                                                                                                                                                                                                                                                                | 4           |
|                   | <a href="#">#3b</a> Hypothesis statement                                                                                                                                                                                                                                                                                                              | 4           |
|                   | <a href="#">#3c</a> Description of study outcomes                                                                                                                                                                                                                                                                                                     | 5           |

|    |                     |                                                                                             |      |
|----|---------------------|---------------------------------------------------------------------------------------------|------|
| 1  | <a href="#">#3d</a> | Type of exposure or intervention used                                                       | 5    |
| 2  |                     |                                                                                             |      |
| 3  | <a href="#">#3e</a> | Type of study designs used                                                                  | 5    |
| 4  |                     |                                                                                             |      |
| 5  | <a href="#">#3f</a> | Study population                                                                            | 5    |
| 6  |                     |                                                                                             |      |
| 7  |                     |                                                                                             |      |
| 8  | <b>Methods</b>      |                                                                                             |      |
| 9  |                     |                                                                                             |      |
| 10 | Search              | <a href="#">#4a</a> Qualifications of searchers (eg, librarians and investigators)          | N/A  |
| 11 | strategy            |                                                                                             |      |
| 12 |                     |                                                                                             |      |
| 13 |                     |                                                                                             |      |
| 14 | Search              | <a href="#">#4b</a> Search strategy, including time period included in the synthesis and    | 5    |
| 15 | strategy            | keywords                                                                                    |      |
| 16 |                     |                                                                                             |      |
| 17 |                     |                                                                                             |      |
| 18 | Search              | <a href="#">#4c</a> Effort to include all available studies, including contact with authors | 5, 7 |
| 19 | strategy            |                                                                                             |      |
| 20 |                     |                                                                                             |      |
| 21 |                     |                                                                                             |      |
| 22 | Search              | <a href="#">#4d</a> Databases and registries searched                                       | 5    |
| 23 | strategy            |                                                                                             |      |
| 24 |                     |                                                                                             |      |
| 25 |                     |                                                                                             |      |
| 26 | Search              | <a href="#">#4e</a> Search software used, name and version, including special features used | 5    |
| 27 | strategy            | (eg, explosion)                                                                             |      |
| 28 |                     |                                                                                             |      |
| 29 |                     |                                                                                             |      |
| 30 | Search              | <a href="#">#4f</a> Use of hand searching (eg, reference lists of obtained articles)        | 5    |
| 31 | strategy            |                                                                                             |      |
| 32 |                     |                                                                                             |      |
| 33 |                     |                                                                                             |      |
| 34 | Search              | <a href="#">#4g</a> List of citations located and those excluded, including justification   | 7    |
| 35 | strategy            |                                                                                             |      |
| 36 |                     |                                                                                             |      |
| 37 |                     |                                                                                             |      |
| 38 | Search              | <a href="#">#4h</a> Method of addressing articles published in languages other than English | 5    |
| 39 | strategy            |                                                                                             |      |
| 40 |                     |                                                                                             |      |
| 41 | Search              | <a href="#">#4i</a> Method of handling abstracts and unpublished studies                    | 6    |
| 42 | strategy            |                                                                                             |      |
| 43 |                     |                                                                                             |      |
| 44 |                     |                                                                                             |      |
| 45 | Search              | <a href="#">#4j</a> Description of any contact with authors                                 | 7    |
| 46 | strategy            |                                                                                             |      |
| 47 |                     |                                                                                             |      |
| 48 |                     |                                                                                             |      |
| 49 |                     | <a href="#">#5a</a> Description of relevance or appropriateness of studies gathered for     | 8    |
| 50 |                     | assessing the hypothesis to be tested                                                       |      |
| 51 |                     |                                                                                             |      |
| 52 |                     | <a href="#">#5b</a> Rationale for the selection and coding of data (eg, sound clinical      | 7    |
| 53 |                     | principles or convenience)                                                                  |      |
| 54 |                     |                                                                                             |      |
| 55 |                     |                                                                                             |      |
| 56 |                     | <a href="#">#5c</a> Documentation of how data were classified and coded (eg, multiple       | 7    |
| 57 |                     | raters, blinding, and interrater reliability)                                               |      |
| 58 |                     |                                                                                             |      |
| 59 |                     |                                                                                             |      |
| 60 |                     |                                                                                             |      |

|    |                     |                                                                                                                                                                                                                                                                              |                                     |
|----|---------------------|------------------------------------------------------------------------------------------------------------------------------------------------------------------------------------------------------------------------------------------------------------------------------|-------------------------------------|
| 1  | <a href="#">#5d</a> | Assessment of confounding (eg, comparability of cases and controls in studies where appropriate)                                                                                                                                                                             | 7                                   |
| 2  |                     |                                                                                                                                                                                                                                                                              |                                     |
| 3  |                     |                                                                                                                                                                                                                                                                              |                                     |
| 4  |                     |                                                                                                                                                                                                                                                                              |                                     |
| 5  | <a href="#">#5e</a> | Assessment of study quality, including blinding of quality assessors; stratification or regression on possible predictors of study results                                                                                                                                   | 7                                   |
| 6  |                     |                                                                                                                                                                                                                                                                              |                                     |
| 7  |                     |                                                                                                                                                                                                                                                                              |                                     |
| 8  |                     |                                                                                                                                                                                                                                                                              |                                     |
| 9  | <a href="#">#5f</a> | Assessment of heterogeneity                                                                                                                                                                                                                                                  | 7                                   |
| 10 |                     |                                                                                                                                                                                                                                                                              |                                     |
| 11 | <a href="#">#5g</a> | Description of statistical methods (eg, complete description of fixed or random effects models, justification of whether the chosen models account for predictors of study results, dose-response models, or cumulative meta-analysis) in sufficient detail to be replicated | 7                                   |
| 12 |                     |                                                                                                                                                                                                                                                                              |                                     |
| 13 |                     |                                                                                                                                                                                                                                                                              |                                     |
| 14 |                     |                                                                                                                                                                                                                                                                              |                                     |
| 15 |                     |                                                                                                                                                                                                                                                                              |                                     |
| 16 |                     |                                                                                                                                                                                                                                                                              |                                     |
| 17 |                     |                                                                                                                                                                                                                                                                              |                                     |
| 18 | <a href="#">#5h</a> | Provision of appropriate tables and graphics                                                                                                                                                                                                                                 | 16, 17, 18,<br>supplemental<br>file |
| 19 |                     |                                                                                                                                                                                                                                                                              |                                     |
| 20 |                     |                                                                                                                                                                                                                                                                              |                                     |
| 21 |                     |                                                                                                                                                                                                                                                                              |                                     |
| 22 |                     |                                                                                                                                                                                                                                                                              |                                     |
| 23 | <b>Results</b>      |                                                                                                                                                                                                                                                                              |                                     |
| 24 |                     |                                                                                                                                                                                                                                                                              |                                     |
| 25 | <a href="#">#6a</a> | Graphic summarizing individual study estimates and overall estimate                                                                                                                                                                                                          | N/A                                 |
| 26 |                     |                                                                                                                                                                                                                                                                              |                                     |
| 27 |                     |                                                                                                                                                                                                                                                                              |                                     |
| 28 | <a href="#">#6b</a> | Table giving descriptive information for each study included                                                                                                                                                                                                                 | 16, 17, 18                          |
| 29 |                     |                                                                                                                                                                                                                                                                              |                                     |
| 30 | <a href="#">#6c</a> | Results of sensitivity testing (eg, subgroup analysis)                                                                                                                                                                                                                       | N/A                                 |
| 31 |                     |                                                                                                                                                                                                                                                                              |                                     |
| 32 | <a href="#">#6d</a> | Indication of statistical uncertainty of findings                                                                                                                                                                                                                            | 10                                  |
| 33 |                     |                                                                                                                                                                                                                                                                              |                                     |
| 34 |                     |                                                                                                                                                                                                                                                                              |                                     |
| 35 | <b>Discussion</b>   |                                                                                                                                                                                                                                                                              |                                     |
| 36 |                     |                                                                                                                                                                                                                                                                              |                                     |
| 37 | <a href="#">#7a</a> | Quantitative assessment of bias (eg, publication bias)                                                                                                                                                                                                                       | N/A                                 |
| 38 |                     |                                                                                                                                                                                                                                                                              |                                     |
| 39 | <a href="#">#7b</a> | Justification for exclusion (eg, exclusion of non-English-language citations)                                                                                                                                                                                                | N/A                                 |
| 40 |                     |                                                                                                                                                                                                                                                                              |                                     |
| 41 |                     |                                                                                                                                                                                                                                                                              |                                     |
| 42 |                     |                                                                                                                                                                                                                                                                              |                                     |
| 43 | <a href="#">#7c</a> | Assessment of quality of included studies                                                                                                                                                                                                                                    | 11                                  |
| 44 |                     |                                                                                                                                                                                                                                                                              |                                     |
| 45 | <b>Conclusion</b>   |                                                                                                                                                                                                                                                                              |                                     |
| 46 |                     |                                                                                                                                                                                                                                                                              |                                     |
| 47 |                     |                                                                                                                                                                                                                                                                              |                                     |
| 48 | <a href="#">#8a</a> | Consideration of alternative explanations for observed results                                                                                                                                                                                                               | N/A                                 |
| 49 |                     |                                                                                                                                                                                                                                                                              |                                     |
| 50 | <a href="#">#8b</a> | Generalization of the conclusions (ie, appropriate for the data presented and within the domain of the literature review)                                                                                                                                                    | 12                                  |
| 51 |                     |                                                                                                                                                                                                                                                                              |                                     |
| 52 |                     |                                                                                                                                                                                                                                                                              |                                     |
| 53 |                     |                                                                                                                                                                                                                                                                              |                                     |
| 54 | <a href="#">#8c</a> | Guidelines for future research                                                                                                                                                                                                                                               | 12                                  |
| 55 |                     |                                                                                                                                                                                                                                                                              |                                     |
| 56 | <a href="#">#8d</a> | Disclosure of funding source                                                                                                                                                                                                                                                 | 15                                  |
| 57 |                     |                                                                                                                                                                                                                                                                              |                                     |
| 58 |                     |                                                                                                                                                                                                                                                                              |                                     |

Notes:

For peer review only - <http://bmjopen.bmj.com/site/about/guidelines.xhtml>

- 5h: 16, 17, 18, supplemental file Reproduced with permission from JAMA. 2000. 283(15):2008-2012. Copyright © 2000 American Medical Association. All rights reserved. This checklist was completed on 09. March 2020 using <https://www.goodreports.org/>, a tool made by the [EQUATOR Network](#) in collaboration with [Penelope.ai](#)

For peer review only
