# Supplementary material for: Associations between multimorbidity and adverse clinical outcomes in patients with chronic kidney disease: a systematic review and meta-analysis
Source: PubMed Central journal article supplement — BMJ Open. 2020 Jun 30;10(6):e038401. doi: 10.1136/bmjopen-2020-038401 (PMC7328898; doi:10.1136/bmjopen-2020-038401), 2020-06-30
Supplement: bmjopen-2020-038401supp001.pdf [file bmjopen-2020-038401supp001.pdf]

## Supplementary File 1. Database Search Terms

|                  |                                                                                                                                                                                                                                                                                                                                                                                                                       |                                                                                                                                                                                                                                                                                                                                                     |                               |
|------------------|-----------------------------------------------------------------------------------------------------------------------------------------------------------------------------------------------------------------------------------------------------------------------------------------------------------------------------------------------------------------------------------------------------------------------|-----------------------------------------------------------------------------------------------------------------------------------------------------------------------------------------------------------------------------------------------------------------------------------------------------------------------------------------------------|-------------------------------|
| Subject headings | Chronic Kidney Failure<br>Kidney Failure<br>Chronic Renal Insufficiency<br>Renal Insufficiency<br>Kidney Disease<br>Kidney Dysfunction<br>Mild renal impairment<br>Moderate renal impairment<br>Severe renal impairment<br>Subclinical renal impairment<br>Renal replacement therapy<br>Hemodialysis<br>Peritoneal Dialysis<br>Continuous Ambulatory<br>Peritoneal Dialysis<br>Kidney transplantation<br>Kidney graft | Multimorbidity<br>Multiple Chronic Conditions                                                                                                                                                                                                                                                                                                       | Humans<br>Adult               |
| Textwords        | Chronic kidney or chronic renal<br>CKF, CKD, CRF or CRD<br>Predialysis or pre-dialysis<br>Renal failure or kidney failure<br>Kidney disease<br>Renal insufficienc*<br>Hemodialysis or Haemodialysis<br>Hemodiafiltration or<br>haemodiafiltration<br>Dialysis<br>Endstage renal or endstage<br>kidney<br>Peritoneal dialysis<br>CAPD or APD or CCPD or PD<br>Kidney Transplant                                        | Multimorbid* or multi morbid<br>Condition count<br>Multiple condition or multicondition<br>or multi condition<br>Multiple disease or multidisease or<br>multi disease<br>Multiple disorder or multidisorder or<br>multi disorder<br>Multiple comorbidities or multiple co<br>morbidities<br>Discordant comorbidities or<br>concordant comorbidities | Adult* or aged* or<br>elderly |

## Supplementary File 2. NEWCASTLE - OTTAWA QUALITY ASSESSMENT SCALE

**Note:** A study can be awarded a maximum of one star for each numbered item within the Selection and Outcome categories. A maximum of two stars can be given for Comparability

### Selection

- 1) Representativeness of the exposed cohort ie chronic kidney disease (CKD) with multimorbidity (MM)
  - a) truly representative of the average CKD/MM population in the community \*
  - b) somewhat representative of the average CKD/MM population in the community \*
  - c) selected group of users eg only one disease group
  - d) no description of the derivation of the cohort
- 2) Selection of the unexposed cohort ie CKD without MM
  - a) drawn from the same community as the exposed cohort \*
  - b) drawn from a different source
  - c) no description of the derivation of the non exposed cohort
  - d) no control group
- 3) Ascertainment of CKD/MM status
  - a) secure record (eg medical records) \*
  - b) structured interview \*
  - c) written self report
  - d) no description
- 4) Demonstration that outcomes were not present at start of study
  - a) yes \*
  - b) no

### Comparability

- 1) Comparability of cohorts on the basis of the design ie are exposed/non-exposed individuals matched or do the authors actively control for confounding factors?
  - a) study controls for ischaemic heart disease \*
  - b) study controls for additional factor(s) \*

Statements of no differences between groups or that differences were not statistically significant are not sufficient for establishing comparability.

### Outcomes

- 1) Assessment of outcome(s)
  - a) independent blind assessment \*
  - b) record linkage \*
  - c) self report
  - d) no description
- 2) Was follow-up long enough ie > 1 year
  - a) yes \*
  - b) no
- 3) Adequacy of follow up of cohorts
  - a) complete follow up - all subjects accounted for \*
  - b) subjects lost to follow up unlikely to introduce bias - small number lost to follow up, or description provided of those lost) \*
  - c) high lost to follow up rate and no description of those lost
  - d) no statement

Total stars /8

## Supplementary File 3. Results from included studies

| Reference                               | Effect size | CCI groups                                                                                                                        | Effect size (95% Confidence Interval) |
|-----------------------------------------|-------------|-----------------------------------------------------------------------------------------------------------------------------------|---------------------------------------|
| CATEGORICAL PRESENTATION OF EFFECT SIZE |             |                                                                                                                                   |                                       |
| Chae 2010                               | HRs         | <b>A. Standard CCI variables</b>                                                                                                  |                                       |
|                                         |             | Quartile 1 (CCI 2)                                                                                                                | Ref                                   |
|                                         |             | Quartile 2 (CCI 4-5)                                                                                                              | 9.22 (3.29-25.84)                     |
|                                         |             | Quartile 3 (CCI 6)                                                                                                                | 16.77 (5.97-47.11)                    |
|                                         |             | Quartile 4 (CCI 7-11)                                                                                                             | 22.37 (8.08-61.93)                    |
|                                         |             | <b>B. CCI excluding age and diabetes</b>                                                                                          |                                       |
|                                         |             | Tertile 1 (CCI 2)                                                                                                                 | Ref                                   |
|                                         |             | Tertile 2 (CCI 3)                                                                                                                 | 1.39 (1.01-2.05)                      |
| Wu 2005                                 | HRs         | <b>CCI excluding age</b>                                                                                                          |                                       |
|                                         |             | CCI < 5                                                                                                                           | Ref                                   |
|                                         |             | CCI ≥ 5                                                                                                                           | 2.88 (1.90-4.37)                      |
| Grosso 2012                             | HRs         | <b>Modified CCI</b>                                                                                                               |                                       |
|                                         |             | 1 point: myocardial infarction, heart failure, peripheral vascular disease, COPD, connective tissue disease or mild liver disease |                                       |
|                                         |             | 2 points: diabetes mellitus, cerebrovascular accident, solid tumour or leukaemia                                                  |                                       |
|                                         |             | CCI ≤ 1                                                                                                                           | Ref                                   |
| Rattanasompattikul 2012                 | HRs         | <b>CCI excluding age and renal disease</b>                                                                                        |                                       |
|                                         |             | Quartile 1 (CCI 0)                                                                                                                | Ref                                   |
|                                         |             | Quartile 2 (CCI 1-2)                                                                                                              | 1.72 (1.26-2.36)                      |
|                                         |             | Quartile 3 (CCI 3)                                                                                                                | 2.60 (1.13-3.26)                      |
|                                         |             | Quartile 4 (CCI 4-9)                                                                                                              | 3.40 (2.41-4.79)                      |
| Wu 2013                                 | HRs         | <b>CCI excluding age</b>                                                                                                          |                                       |
|                                         |             | CCI ≤ 3                                                                                                                           | Ref                                   |
|                                         |             | CCI 4-6                                                                                                                           | 2.49 (2.35-2.63)                      |
|                                         |             | CCI 7-9                                                                                                                           | 3.53 (3.34-3.73)                      |
|                                         |             | CCI 10-12                                                                                                                         | 3.66 (3.45-3.88)                      |
|                                         |             | CCI 13-15                                                                                                                         | 4.12 (3.84-4.42)                      |
|                                         |             | CCI > 15                                                                                                                          | 4.42 (4.02-4.86)                      |

| CONTINUOUS PRESENTATION OF EFFECT SIZES                 |               |                                                                                                                                                                                                                                                                                                                                                                                                                                                                       |                  |
|---------------------------------------------------------|---------------|-----------------------------------------------------------------------------------------------------------------------------------------------------------------------------------------------------------------------------------------------------------------------------------------------------------------------------------------------------------------------------------------------------------------------------------------------------------------------|------------------|
| Beddhu 2000                                             | HRs           | <b>Modified CCI</b><br>1 point: coronary artery disease, heart failure, peripheral vascular disease, cerebrovascular disease, dementia, chronic pulmonary disease, connective tissue disorder, peptic ulcer disease, mild liver disease, diabetes<br>2 points: hemiplegia, moderate or severe renal disease, diabetes with end-organ damage, any tumour, leukaemia, lymphoma<br>3 points: moderate or severe liver disease<br>6 points: metastatic solid tumour, AIDS |                  |
|                                                         |               | Each increase in CCI                                                                                                                                                                                                                                                                                                                                                                                                                                                  | 1.24 (1.11-1.39) |
| Fried 2001                                              | Relative risk | <b>Standard CCI variables</b>                                                                                                                                                                                                                                                                                                                                                                                                                                         |                  |
|                                                         |               | Each increase in CCI                                                                                                                                                                                                                                                                                                                                                                                                                                                  | 1.54 (1.36-1.74) |
| Park 2015                                               | HRs           | <b>A. Standard CCI variables</b>                                                                                                                                                                                                                                                                                                                                                                                                                                      |                  |
|                                                         |               | Each increase in CCI                                                                                                                                                                                                                                                                                                                                                                                                                                                  | 1.42 (1.39-1.45) |
|                                                         |               | <b>B. Modified CCI in incident haemodialysis patients</b><br>Details not provided                                                                                                                                                                                                                                                                                                                                                                                     |                  |
|                                                         |               | Each increase in CCI                                                                                                                                                                                                                                                                                                                                                                                                                                                  | 1.72 (1.66-1.78) |
| Shum 2013                                               | HRs           | <b>ESRD Modified CCI</b>                                                                                                                                                                                                                                                                                                                                                                                                                                              |                  |
|                                                         |               | Each increase in CCI (PD group only)                                                                                                                                                                                                                                                                                                                                                                                                                                  | 1.36 (1.18-1.56) |
| CONTINUOUS AND CATEGORICAL PRESENTATION OF EFFECT SIZES |               |                                                                                                                                                                                                                                                                                                                                                                                                                                                                       |                  |
| Fernandez 2019                                          | HRs           | <b>ESRD Modified CCI</b>                                                                                                                                                                                                                                                                                                                                                                                                                                              |                  |
|                                                         |               | Each increase in CCI                                                                                                                                                                                                                                                                                                                                                                                                                                                  | 1.08 (1.03-1.13) |
|                                                         |               | Low comorbidity burden CCI 0-1                                                                                                                                                                                                                                                                                                                                                                                                                                        | Ref              |
|                                                         |               | High comorbidity burden CCI ≥ 2                                                                                                                                                                                                                                                                                                                                                                                                                                       | 1.38 (1.01-1.89) |

Results from studies using Charlson Comorbidity Index (CCI) as Multimorbidity Measure. HR; hazard ratio. COPD; Chronic Obstructive Pulmonary Disease. AIDS; Acquired Immune Deficiency Syndrome. PD; peritoneal dialysis.

| Reference                               | Effect size | Conditions and groups                                                                                                                                                                                                                                                                                                                                                                                             | Effect size (95% Confidence Interval) |
|-----------------------------------------|-------------|-------------------------------------------------------------------------------------------------------------------------------------------------------------------------------------------------------------------------------------------------------------------------------------------------------------------------------------------------------------------------------------------------------------------|---------------------------------------|
| CATEGORICAL PRESENTATION OF EFFECT SIZE |             |                                                                                                                                                                                                                                                                                                                                                                                                                   |                                       |
| Bowling 2016                            | HRs         | 22 conditions: hypertension, hyperlipidemia, coronary heart disease, atrial fibrillation, heart failure, peripheral arterial disease, arthritis, osteoporosis, gout, diabetes, hypothyroidism, cancer, prostate cancer, anaemia, cerebrovascular disease, depression, dementia, epilepsy, Parkinson's disease, gastroesophageal reflux disease/peptic ulcer disease, benign prostatic hypertrophy and COPD/asthma |                                       |
|                                         |             | 1                                                                                                                                                                                                                                                                                                                                                                                                                 | Ref                                   |
|                                         |             | 2                                                                                                                                                                                                                                                                                                                                                                                                                 | 0.95 (0.93-0.97)                      |
|                                         |             | 3                                                                                                                                                                                                                                                                                                                                                                                                                 | 1.03 (1.01-1.05)                      |
|                                         |             | 4                                                                                                                                                                                                                                                                                                                                                                                                                 | 1.24 (1.21-1.26)                      |
|                                         |             | 5                                                                                                                                                                                                                                                                                                                                                                                                                 | 1.43 (1.39-1.47)                      |
|                                         |             | ≥ 6                                                                                                                                                                                                                                                                                                                                                                                                               | 1.72 (1.64-1.80)                      |

|                                                |                        |                                                                                                                                                                                                                                                                                                                                                                                                                                                                                                                                                  |                                                   |
|------------------------------------------------|------------------------|--------------------------------------------------------------------------------------------------------------------------------------------------------------------------------------------------------------------------------------------------------------------------------------------------------------------------------------------------------------------------------------------------------------------------------------------------------------------------------------------------------------------------------------------------|---------------------------------------------------|
| Fraser 2015                                    | HRs                    | 11 conditions: hypertension, diabetes, ischaemic heart disease, heart failure, peripheral vascular disease, cerebrovascular disease, chronic respiratory disorder, depression, chronic painful condition, thyroid disorder and anaemia                                                                                                                                                                                                                                                                                                           |                                                   |
|                                                |                        | 0-1                                                                                                                                                                                                                                                                                                                                                                                                                                                                                                                                              | Ref                                               |
|                                                |                        | 2                                                                                                                                                                                                                                                                                                                                                                                                                                                                                                                                                | 2.31 (1.36-3.94)                                  |
|                                                |                        | ≥ 3                                                                                                                                                                                                                                                                                                                                                                                                                                                                                                                                              | 4.58 (2.85-7.38)                                  |
| Lee 2018                                       | 10-year survival rates | 12 conditions: diabetes, hypertension, gout, heart failure, ischemic heart disease, cerebrovascular disease, liver disease, malignancy, tuberculosis, hyperlipidaemia, anaemia and connective tissue disease                                                                                                                                                                                                                                                                                                                                     |                                                   |
|                                                |                        | 0                                                                                                                                                                                                                                                                                                                                                                                                                                                                                                                                                | 93.7%                                             |
|                                                |                        | 1                                                                                                                                                                                                                                                                                                                                                                                                                                                                                                                                                | 94.3%                                             |
|                                                |                        | 2                                                                                                                                                                                                                                                                                                                                                                                                                                                                                                                                                | 92.9%                                             |
| Tonelli 2015                                   | HRs                    | 29 conditions: alcohol misuse, asthma, atrial fibrillation, lymphoma, non-metastatic cancer, metastatic cancer, heart failure, chronic pain, COPD, chronic hepatitis B, cirrhosis, severe constipation, dementia, depression, diabetes, epilepsy, hypertension, hypothyroidism, inflammatory bowel disease, irritable bowel syndrome, multiple sclerosis, myocardial infarction, Parkinson's disease, peptic ulcer disease, peripheral vascular disease, psoriasis, rheumatoid arthritis, schizophrenia, and stroke or transient ischemic attack |                                                   |
|                                                |                        | 0                                                                                                                                                                                                                                                                                                                                                                                                                                                                                                                                                | Ref                                               |
|                                                |                        | 1                                                                                                                                                                                                                                                                                                                                                                                                                                                                                                                                                | 1.57 (1.50-1.63)                                  |
|                                                |                        | 2                                                                                                                                                                                                                                                                                                                                                                                                                                                                                                                                                | 2.34 (2.24-2.44)                                  |
|                                                |                        | 3                                                                                                                                                                                                                                                                                                                                                                                                                                                                                                                                                | 3.43 (3.29-3.58)                                  |
|                                                |                        | 4                                                                                                                                                                                                                                                                                                                                                                                                                                                                                                                                                | 4.81 (4.60-5.02)                                  |
| ≥ 5                                            | 7.74 (7.43-8.07)       |                                                                                                                                                                                                                                                                                                                                                                                                                                                                                                                                                  |                                                   |
| <b>CONTINUOUS PRESENTATION OF EFFECT SIZES</b> |                        |                                                                                                                                                                                                                                                                                                                                                                                                                                                                                                                                                  |                                                   |
| Davies 1995                                    | HRs                    | <b>Development of the Stoke Comorbidity Grade</b><br>11 conditions: ischaemic heart disease, peripheral vascular disease, cerebrovascular disease, left ventricular dysfunction, diabetes mellitus, systemic collagen vascular disease, COPD, pulmonary fibrosis, pulmonary tuberculosis, asthma and cirrhosis<br>Low grade: 0 conditions<br>Intermediate grade: 1-2 conditions<br>High grade: ≥ 3 conditions                                                                                                                                    |                                                   |
|                                                |                        | Each increase in grade                                                                                                                                                                                                                                                                                                                                                                                                                                                                                                                           | 2.66 (1.55-4.55)                                  |
| Davies 2002                                    | Relative risk          | <b>Stoke Comorbidity Grade</b>                                                                                                                                                                                                                                                                                                                                                                                                                                                                                                                   |                                                   |
|                                                |                        | Each increase in grade                                                                                                                                                                                                                                                                                                                                                                                                                                                                                                                           | 2.4 (1.4-4.1)                                     |
| Ellam 2008                                     | Narrative              | <b>Stoke Comorbidity Grade</b>                                                                                                                                                                                                                                                                                                                                                                                                                                                                                                                   | "No statistically significant effect on survival" |
| Wong 2007                                      | HRs                    | <b>Stoke Comorbidity Grade</b>                                                                                                                                                                                                                                                                                                                                                                                                                                                                                                                   |                                                   |
|                                                |                        | Each increase in grade                                                                                                                                                                                                                                                                                                                                                                                                                                                                                                                           | 2.53 (1.32-4.83)                                  |
| Lhotta 2003                                    | HRs                    | Five conditions: diabetes, heart failure, coronary artery disease, cerebrovascular disease and peripheral vascular disease                                                                                                                                                                                                                                                                                                                                                                                                                       |                                                   |
|                                                |                        | Each increase in comorbidity score                                                                                                                                                                                                                                                                                                                                                                                                                                                                                                               | 1.78 (1.32-2.40)                                  |

Results from studies using Condition Count as Multimorbidity Measure. COPD; chronic obstructive pulmonary disease. HR; hazard ratio.

| Reference    | Effect size measure | Multimorbidity measure and groups                                                                                                                                                                                                                           | Effect size (95% Confidence Interval) |
|--------------|---------------------|-------------------------------------------------------------------------------------------------------------------------------------------------------------------------------------------------------------------------------------------------------------|---------------------------------------|
| Chandna 1999 | HRs                 | <b>Comorbidity severity score (CSS)</b><br>Cardiac score, according to New York Heart Association, respiratory disease score (1-4), cerebrovascular disease score (1-4), peripheral vascular disease score (1-4), cirrhosis (4), and malignancy score (1-4) |                                       |
|              |                     | Each increase in CSS                                                                                                                                                                                                                                        | 1.238 (1.145-1.338)                   |
| Chandna 2010 | HRs                 | <b>Comorbidity severity score</b>                                                                                                                                                                                                                           |                                       |
|              |                     | Low comorbidity (CSS ≤ 4)                                                                                                                                                                                                                                   | Ref                                   |
|              |                     | High comorbidity (CSS > 4)                                                                                                                                                                                                                                  | 1.823 (1.255-2.650)                   |
| Pieloch 2015 | HRs                 | <b>Kidney Transplant Morbidity Index</b>                                                                                                                                                                                                                    |                                       |
|              |                     | 0                                                                                                                                                                                                                                                           | Ref                                   |
|              |                     | 1                                                                                                                                                                                                                                                           | 1.85 (1.45-2.36)                      |
|              |                     | 2                                                                                                                                                                                                                                                           | 3.11 (2.46-3.94)                      |
|              |                     | 3                                                                                                                                                                                                                                                           | 5.00 (3.96-6.31)                      |
|              |                     | 4                                                                                                                                                                                                                                                           | 7.37 (5.83-9.32)                      |
|              |                     | 5                                                                                                                                                                                                                                                           | 9.41 (7.41-11.94)                     |
|              |                     | 6                                                                                                                                                                                                                                                           | 12.15 (9.45-15.63)                    |
| ≥ 7          | 13.03 (9.68-17.54)  |                                                                                                                                                                                                                                                             |                                       |
| Ritchie 2009 | HRs                 | <b>Heart failure, CKD and diabetes</b>                                                                                                                                                                                                                      |                                       |
|              |                     | Heart failure and CKD                                                                                                                                                                                                                                       | Ref                                   |
|              |                     | Heart failure, CKD and diabetes                                                                                                                                                                                                                             | 1.25 (1.07-1.46)                      |

Results from studies using other Multimorbidity Measures. HR; hazard ratio. CKD; chronic kidney disease.

| Reference       | Scores studied                                                  | Presentation of effect size |
|-----------------|-----------------------------------------------------------------|-----------------------------|
| Hemmelgarn 2003 | CCI<br>Development of ESRD modified CCI                         | Kaplan-Meier curves         |
| Di Iorio 2004   | CCI<br>Development of CCI modified for haemodialysis patients   | Relative risk, 5.5 for CCI  |
| van Manen 2002  | CCI<br>Khan index<br>Davies index<br>Development of a new index | Kaplan-Meier curves         |

Studies that analyse different Multimorbidity Measures. CCI; Charlson Comorbidity Index

## Supplementary File 4. Meta-analysis with random effects models

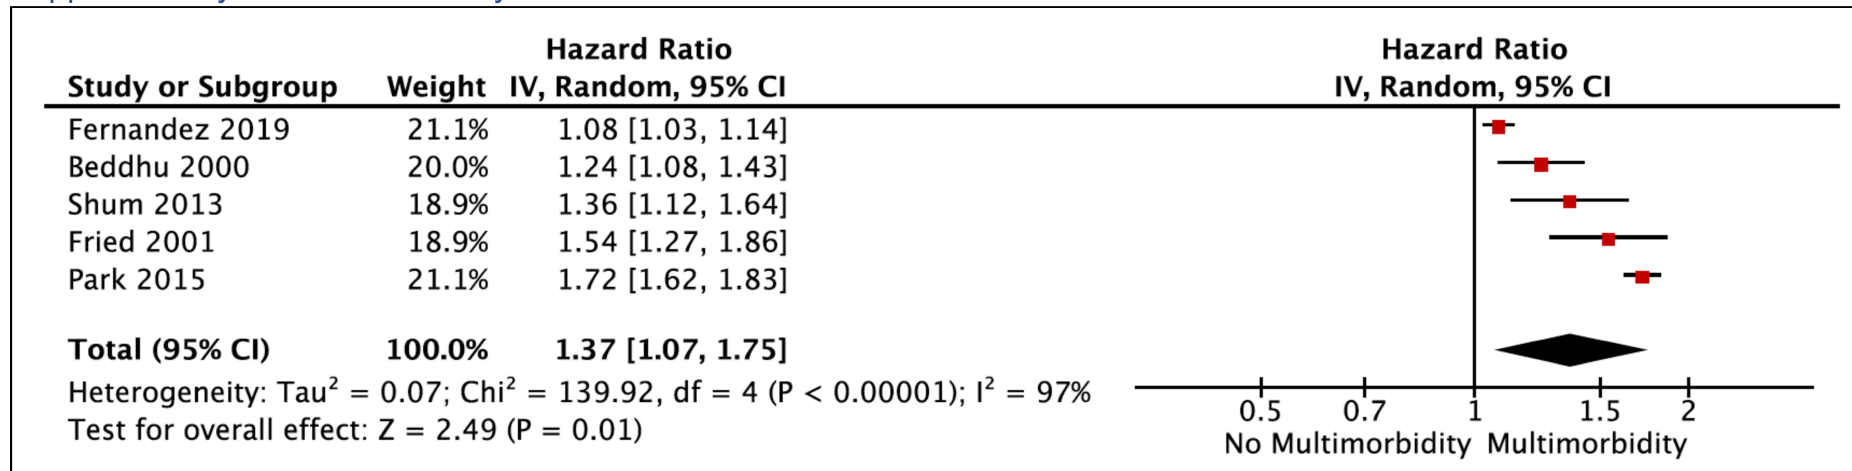

Mortality risk for Charlson Comorbidity Index as a continuous variable (Random Effects Model)

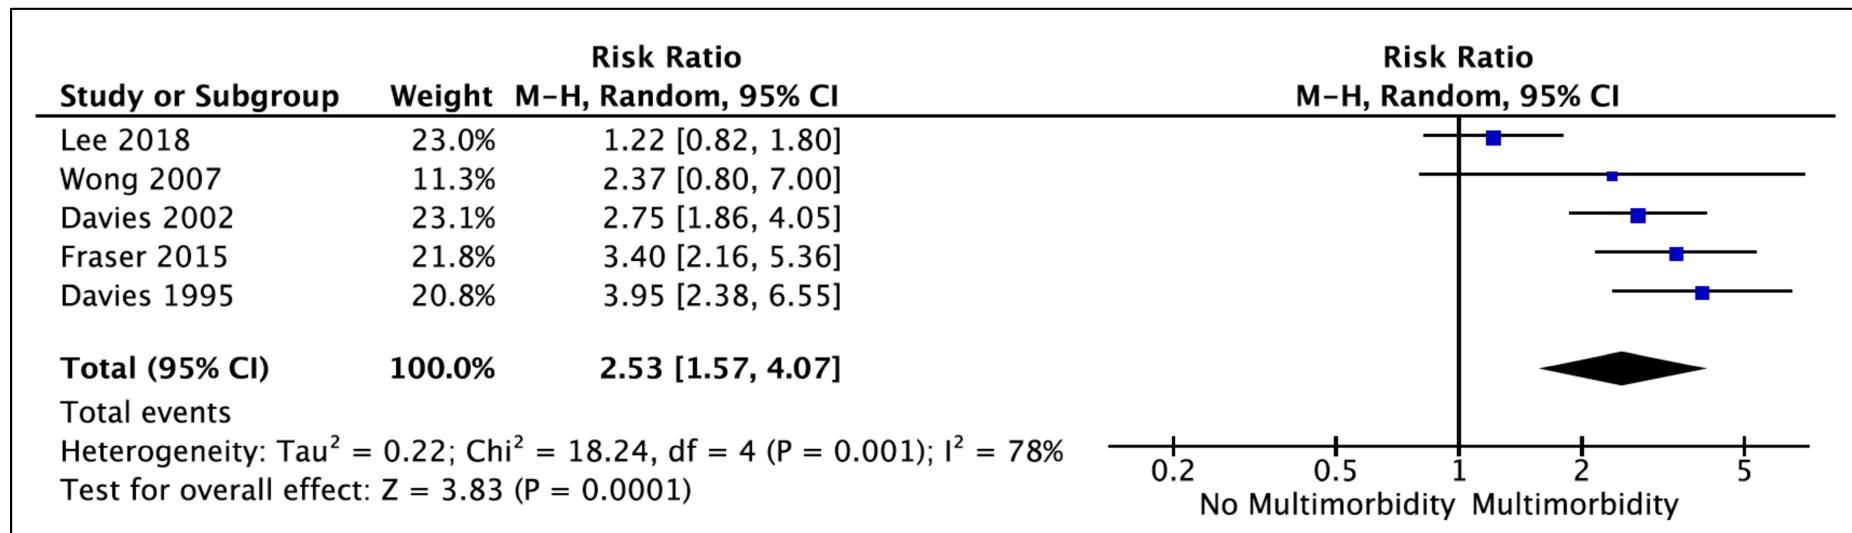

Mortality risk for patients with multimorbidity (Random Effects Model)

## Supplementary File 5. Risk of bias: Results from Newcastle Ottawa Scale

| Reference               | Selection |   |   |   | Comparability | Outcome assessment |   |   | Quality score |
|-------------------------|-----------|---|---|---|---------------|--------------------|---|---|---------------|
|                         | 1         | 2 | 3 | 4 |               | 5                  | 6 | 7 |               |
| Beddhu 2000             |           | * | * | * | *             | *                  | * |   | 6             |
| Bowling 2016            | *         | * | * | * | *             | *                  | * |   | 7             |
| Chae 2010               |           | * | * | * | *             | *                  | * |   | 6             |
| Chandna 1999            |           | * | * | * | *             | *                  | * |   | 6             |
| Chandna 2010            |           | * | * | * |               | *                  | * |   | 5             |
| Davies 1995             |           | * | * | * | *             | *                  | * |   | 6             |
| Davies 2002             |           | * | * | * | *             | *                  | * |   | 6             |
| Di Iorio 2004           |           | * | * | * | *             | *                  | * |   | 6             |
| Ellam 2008              |           | * | * | * |               | *                  | * |   | 5             |
| Fernandez 2019          |           | * | * | * | *             | *                  | * |   | 6             |
| Fraser 2015             |           | * | * | * | *             | *                  | * |   | 6             |
| Fried 2001              |           | * | * | * | *             | *                  | * |   | 6             |
| Grosso 2012             |           | * | * | * | *             | *                  | * |   | 6             |
| Hemmelgarn 2003         |           | * | * | * | *             | *                  | * | * | 7             |
| Lee 2018                | *         | * | * | * | *             | *                  | * |   | 7             |
| Lhotta 2003             |           | * | * | * | *             | *                  | * |   | 6             |
| Park 2015               |           | * | * | * | *             | *                  | * |   | 6             |
| Pieloch 2015            |           | * | * | * | *             | *                  | * |   | 6             |
| Rattanasompattikul 2012 |           | * | * | * | *             | *                  | * |   | 6             |
| Ritchie 2009            |           | * | * | * | *             | *                  | * |   | 6             |
| Shum 2013               |           | * | * | * | *             | *                  | * |   | 6             |
| Tonelli 2015            | *         | * | * | * | *             | *                  | * |   | 7             |
| van Manen 2002          |           | * | * | * | *             | *                  | * |   | 6             |
| Wong 2007               |           | * | * | * | *             | *                  | * |   | 6             |
| Wu 2005                 |           | * | * | * | *             | *                  | * |   | 6             |
| Wu 2013                 |           | * | * | * | *             | *                  | * |   | 6             |

Table 3. Newcastle Ottawa Scale. 1. Representativeness of the exposed cohort. 2. Selection of the non-exposed cohort. 3. Ascertainment of chronic kidney disease/multimorbidity status. 4. Demonstration that outcomes were not present at start of study. 5. Comparability of cohorts on the basis of the design. 6. Assessment of outcome(s). 7. Was follow-up long enough. 8. Adequacy of follow up of cohort.
